# Supplementary material
Source: publisher site journal article supplement (https://www.spandidos-publications.com/539/downloadSupplementary)
Supplement: Supplementary file 1 [file downloadSupplementary]

## Sheet: 3,4,6--1,2,5.different.gene
Supplementary Table S3. Gene expression in patients with osteonecrosis(ON) and osteoarthritis(OA).
gene	control	treat	OA1	OA2	OA3	ON1	ON2	ON3	log2(Fold_change)	p-value	q-value	Description
A2M	7.10827	2.12931	3.64634	6.26128	11.4172	1.04897	2.71081	2.62814	-1.73912	5.78778e-206	3.99901e-204	alpha-2-macroglobulin
A2M-AS1	1.28651	0.52939	1.04788	1.25603	1.55563	0.316085	0.579613	0.692472	-1.28106	1.22269e-11	1.22229e-10	A2M antisense RNA 1
ABCA13	0.182326	0.0859666	0.229744	0.185243	0.13199	0.0755798	0.0299451	0.152375	-1.08467	1.83714e-09	1.53002e-08	ATP-binding cassette, sub-family A (ABC1), member 13
ABCA9	0.244484	0.112755	0.0978035	0.325683	0.309966	0.0864375	0.103576	0.148252	-1.11655	1.58927e-06	9.65507e-06	ATP-binding cassette, sub-family A (ABC1), member 9
ABCG1	0.331483	0.109786	0.0427365	0.385473	0.566241	0.0290538	0.107925	0.192379	-1.59424	2.2959e-08	1.71958e-07	ATP-binding cassette, sub-family G (WHITE), member 1
ABI3	0.558846	0.152675	0.146102	0.628258	0.902177	0.119191	0.184481	0.154354	-1.87198	4.60157e-10	4.05218e-09	ABI family, member 3
ACER2	0.289873	0.135431	0.195822	0.351271	0.322526	0.235038	0.0968142	0.0744405	-1.09786	0.000170767	0.000777152	alkaline ceramidase 2
ACP5	9.97414	3.06224	2.86212	12.775	14.2853	4.7798	2.47546	1.93146	-1.70361	6.05971e-128	3.45788e-126	acid phosphatase 5, tartrate resistant
ACSL5	2.94522	1.23495	0.756128	2.08886	5.99068	1.33162	0.509534	1.86371	-1.25392	2.97759e-58	1.17994e-56	acyl-CoA synthetase long-chain family member 5
ACSM5	1.54648	0.661884	0.843886	1.26917	2.52637	0.372367	0.928716	0.684569	-1.22433	1.98398e-15	2.54042e-14	acyl-CoA synthetase medium-chain family member 5
ACY3	0.123193	0.00362913	0	0.0497184	0.319862	0	0	0.0108874	-5.08516	0.000207252	0.000928729	aspartoacylase (aminocyclase) 3
ADAM33	1.22542	0.428964	3.497	0.114795	0.0644533	0.0119055	0.189026	1.08596	-1.51434	1.13115e-11	1.13452e-10	ADAM metallopeptidase domain 33
ADAM8	0.720397	0.226343	0.227527	0.841944	1.09172	0.196723	0.319374	0.162932	-1.67028	3.13926e-16	5.42646e-15	ADAM metallopeptidase domain 8
ADAMTS4	4.13815	1.80718	1.40924	3.71884	7.28636	1.08801	1.7557	2.57784	-1.19524	2.57567e-72	1.17859e-70	ADAM metallopeptidase with thrombospondin type 1 motif, 4
ADAP1	0.685358	0.280522	0.422982	0.417532	1.21556	0.378901	0.243229	0.219436	-1.28874	2.21946e-09	1.83208e-08	ArfGAP with dual PH domains 1
ADAP2	0.916973	0.308019	0.245193	0.846425	1.6593	0.198124	0.483946	0.241986	-1.57386	5.80107e-16	8.11347e-15	ArfGAP with dual PH domains 2
ADH1B	0.293203	0.0571125	0.014361	0.728999	0.136248	0.0312421	0.0187183	0.121377	-2.36002	3.34231e-08	2.46301e-07	alcohol dehydrogenase 1B (class I), beta polypeptide
ADORA2A	0.476947	0.232192	0.157607	0.541555	0.73168	0.155108	0.381508	0.159959	-1.03851	7.00754e-05	0.000339622	adenosine A2a receptor
AFAP1L2	0.218342	0.078443	0.0339051	0.186944	0.434176	0.0210743	0.0505056	0.163749	-1.47687	3.79735e-06	2.19217e-05	actin filament associated protein 1-like 2
AGT	3.56659	1.69552	1.51468	7.52518	1.6599	0.819732	1.32752	2.9393	-1.07282	9.01439e-23	2.07811e-21	angiotensinogen (serpin peptidase inhibitor, clade A, member 8)
AIM2	0.22952	0.0557435	0.0129772	0.0217769	0.653805	0.0423473	0.0676584	0.0572249	-2.04174	0.000146896	0.000675742	absent in melanoma 2
ALDH1A1	1.06636	0.225693	0.260135	0.641155	2.29779	0.0884247	0.0688722	0.519782	-2.24026	3.90334e-26	9.71907e-25	aldehyde dehydrogenase 1 family, member A1
ALDH1A2	0.136404	0.0159956	0.0101385	0.140361	0.258712	0.0330842	0	0.0149025	-3.09214	3.56944e-09	2.90003e-08	aldehyde dehydrogenase 1 family, member A2
ALDH1A3	10.8088	4.99062	7.77488	8.68721	15.9644	5.664	2.45985	6.848	-1.11492	1.09863e-140	6.57879e-139	aldehyde dehydrogenase 1 family, member A3
ALOX5	0.541206	0.188145	0.0676779	0.630944	0.924996	0.204489	0.210729	0.149218	-1.52433	1.01466e-09	8.64334e-09	arachidonate 5-lipoxygenase
ALOX5AP	0.58058	0.0957734	0.0758194	0.35625	1.30967	0.0164943	0.148236	0.12259	-2.5998	1.12687e-09	9.56554e-09	arachidonate 5-lipoxygenase-activating protein
ALPK2	15.2406	31.0587	17.7913	17.8208	10.1098	49.9218	20.8237	22.4306	1.02707	6.66134e-16	8.76564e-15	alpha-kinase 2
ALX4	0.766728	0.316991	0.155023	1.03171	1.11345	0.268267	0.250278	0.432428	-1.27427	5.30375e-20	1.13029e-18	ALX homeobox 4
AMIGO2	1.97514	4.94737	4.37707	1.13694	0.411409	9.63355	4.32014	0.888407	1.32471	0	0	adhesion molecule with Ig-like domain 2
ANKRD22	0.0687409	0.00947603	0.00967016	0.0162274	0.180325	0	0	0.0284281	-2.85881	0.00012273	0.000571407	ankyrin repeat domain 22
ANKRD36BP2	1.05613	0.361853	0.333956	1.55981	1.27463	0.0968685	0.137839	0.850853	-1.54531	1.22789e-10	1.13789e-09	ankyrin repeat domain 36B pseudogene 2
ANKRD65	1.64339	0.684337	1.61656	1.23842	2.07519	1.0321	0.297734	0.723177	-1.2639	2.71706e-17	5.2297e-16	ankyrin repeat domain 65
AOAH	0.352761	0.115347	0.0753153	0.189579	0.79339	0.0819234	0.142342	0.121775	-1.61271	1.49416e-07	1.02624e-06	acyloxyacyl hydrolase (neutrophil)
AOC3	0.832878	0.287746	0.477512	0.816871	1.20425	0.0806849	0.302134	0.480419	-1.53331	1.73785e-18	3.52395e-17	amine oxidase, copper containing 3
APLNR	1.72146	0.755755	0.337862	2.72643	2.1001	0.318865	0.641131	1.30727	-1.18764	2.06804e-24	4.96574e-23	apelin receptor
APOB	0.167424	0.0721636	0.085919	0.286072	0.13028	0.0326359	0.0515499	0.132305	-1.21416	1.10275e-08	8.55261e-08	apolipoprotein B
APOC1	8.88688	2.61566	2.59003	11.2513	12.8193	2.59008	1.38846	3.86845	-1.7645	5.77134e-30	1.55518e-28	apolipoprotein C-I
APOE	180.242	53.5345	26.6186	270.093	244.014	18.1962	38.7262	103.681	-1.75139	0	0	apolipoprotein E
APOL1	34.8807	4.45234	5.72828	6.42955	92.4842	3.72207	4.01242	5.62254	-2.96979	0	0	apolipoprotein L, 1
APOL2	34.2966	9.626	9.32989	14.3371	79.2227	9.49765	9.48099	9.89935	-1.83306	0	0	apolipoprotein L, 2
APOL3	9.70143	1.72713	1.58801	2.90529	24.611	1.18052	2.03615	1.96472	-2.48982	0	0	apolipoprotein L, 3
APOL4	4.97562	0.505022	0.1579	1.26807	13.5009	0.147217	0.12863	1.23922	-3.30046	5.37993e-263	4.0901e-261	apolipoprotein L, 4
APOL6	18.8141	6.41643	4.94417	7.01385	44.4843	4.86971	4.62463	9.75495	-1.55197	0	0	apolipoprotein L, 6
AQP1	3.00294	0.977781	1.8821	3.194	3.93273	0.891537	0.747815	1.29399	-1.61879	9.39795e-56	3.64088e-54	aquaporin 1 (Colton blood group)
AQP3	0.90395	0.280913	0.360254	1.3818	0.969796	0.291097	0.241487	0.310154	-1.68612	9.67519e-12	9.74835e-11	aquaporin 3 (Gill blood group)
AQP9	0.589688	0.172667	0.050998	0.604405	1.11366	0.235758	0.174487	0.107757	-1.77196	2.36294e-15	3.01135e-14	aquaporin 9
ARAP2	0.135154	0.0367892	0.0313906	0.105353	0.268717	0.0426809	0.0119335	0.0557532	-1.87725	9.5279e-10	8.13343e-09	ArfGAP with RhoGAP domain, ankyrin repeat and PH domain 2
ARC	0.285531	0.0496127	0.111054	0.70707	0.0384686	0.113692	0.025544	0.00960218	-2.52486	1.68494e-09	1.4081e-08	activity-regulated cytoskeleton-associated protein
ARHGAP15	0.368821	0.145356	0.13138	0.459309	0.515773	0.142907	0.0356755	0.257485	-1.34333	0.000119154	0.000555502	Rho GTPase activating protein 15
ARHGAP25	0.743161	0.210816	0.338753	0.450031	1.4407	0.171955	0.228126	0.232367	-1.81769	4.03934e-20	8.64625e-19	Rho GTPase activating protein 25
ARHGAP29	1.14426	0.566163	1.147	1.05986	1.22592	0.431961	0.536881	0.729648	-1.01512	1.06835e-26	2.68214e-25	Rho GTPase activating protein 29
ARHGAP30	1.39456	0.342934	0.278536	1.14296	2.76217	0.317176	0.388573	0.323054	-2.0238	4.97828e-55	1.89534e-53	Rho GTPase activating protein 30
ARHGAP4	0.72907	0.269513	0.222736	0.622954	1.34152	0.205005	0.368479	0.235054	-1.4357	2.37027e-14	2.86132e-13	Rho GTPase activating protein 4
ARHGAP6	0.862756	0.415316	0.462889	1.18943	0.935949	0.325179	0.356136	0.564633	-1.05474	3.78224e-16	6.23989e-15	Rho GTPase activating protein 6
ARHGAP9	0.358639	0.141113	0.142413	0.277002	0.656502	0.0985779	0.139217	0.185543	-1.34569	1.85202e-06	1.11369e-05	Rho GTPase activating protein 9
ARL11	0.115107	0.0314625	0.0204874	0.0902468	0.234586	0	0.0567449	0.0376426	-1.87127	0.000198811	0.000893381	ADP-ribosylation factor-like 11
ASB2	0.512906	0.244094	0.427701	0.305517	0.805501	0.226327	0.195868	0.310088	-1.07126	5.15687e-07	3.3315e-06	ankyrin repeat and SOCS box containing 2
ASCL2	0.227455	0.011891	0	0.0349561	0.647408	0	0.0203634	0.0153095	-4.25764	1.29483e-08	9.9563e-08	achaete-scute complex homolog 2 (Drosophila)
ASPA	0.476934	0.166787	0.207775	0.653748	0.569279	0.0847517	0.033852	0.381756	-1.51579	6.68537e-05	0.000324852	aspartoacylase
ATP6V0D2	0.685417	0.259351	0.178767	0.606795	1.27069	0.362388	0.158869	0.256796	-1.40208	3.49397e-11	3.37997e-10	ATPase, H+ transporting, lysosomal 38kDa, V0 subunit d2
ATP8B4	0.801725	0.364129	0.350207	0.919968	1.135	0.227848	0.255961	0.608577	-1.13866	1.01739e-17	2.00599e-16	ATPase, class I, type 8B, member 4
B3GNT7	0.25818	0.0924083	0.063751	0.307568	0.40322	0.0809019	0.0830939	0.113229	-1.48228	1.06223e-06	6.60544e-06	UDP-GlcNAc:betaGal beta-1,3-N-acetylglucosaminyltransferase 7
BARX1	2.24042	0.792844	3.11872	1.41741	2.18513	0.706741	1.11787	0.55392	-1.49866	2.42455e-15	3.08824e-14	BARX homeobox 1
BATF	1.11961	0.409159	0.184386	0.962633	2.21181	0.891396	0.0801104	0.25597	-1.45226	3.31672e-09	2.70286e-08	basic leucine zipper transcription factor, ATF-like
BATF2	3.10734	0.116333	0	0.21897	9.10306	0.215351	0.0410535	0.0925938	-4.73935	1.5585e-138	9.26388e-137	basic leucine zipper transcription factor, ATF-like 2
BATF3	1.49286	0.67653	0.412253	0.675329	3.39099	0.42707	0.89556	0.706959	-1.14185	1.37446e-07	9.46972e-07	basic leucine zipper transcription factor, ATF-like 3
BCL2A1	2.8455	0.4674	0.592243	0.942435	7.00182	0.377638	0.439206	0.585356	-2.60595	6.04556e-34	1.74752e-32	BCL2-related protein A1
BCL6B	0.808688	0.368891	0.207605	1.1139	1.10456	0.0950822	0.284837	0.726753	-1.13239	1.14977e-10	1.07e-09	B-cell CLL/lymphoma 6, member B
BDKRB2	7.80459	2.44639	3.25787	10.7107	9.4452	2.74013	2.80498	1.79407	-1.67367	9.50886e-199	6.42365e-197	bradykinin receptor B2
BIN2	0.644243	0.151649	0.174203	0.635815	1.12271	0.123167	0.158941	0.172839	-2.08687	1.67003e-13	1.90685e-12	bridging integrator 2
BIRC3	0.750049	0.26067	0.192247	0.40443	1.65347	0.342463	0.197919	0.241627	-1.52476	4.81056e-37	1.47865e-35	baculoviral IAP repeat containing 3
BLNK	0.374578	0.108779	0.126421	0.45965	0.537663	0.126054	0.0686577	0.131626	-1.78386	4.88141e-06	2.77766e-05	B-cell linker
BMP5	1.88727	0.725374	0.248492	3.56678	1.84654	0.135147	0.821286	1.21969	-1.3795	1.62135e-17	3.16085e-16	bone morphogenetic protein 5
BNC1	0.290681	0.611033	0.496903	0.276782	0.0983569	1.3399	0.367375	0.125824	1.07182	5.73303e-07	3.68213e-06	basonuclin 1
BOC	4.13173	2.02264	1.95281	6.35013	4.09225	2.43738	1.71252	1.91801	-1.03051	4.03771e-54	1.52765e-52	BOC cell adhesion associated, oncogene regulated
BPIFB1	0.873159	0.176641	0.0669072	1.61865	0.933919	0	0.0218019	0.508121	-2.30542	3.58573e-14	4.27747e-13	BPI fold containing family B, member 1
BPIFB4	1.75286	0.347702	0.87698	1.0257	3.35591	0	0.600398	0.442707	-2.33379	3.88091e-36	1.16485e-34	BPI fold containing family B, member 4
BRD2	0.147874	0.0586115	0.231345	0.162328	0.049948	0.0583151	0.105956	0.0115634	-1.33511	4.28928e-15	5.39822e-14	bromodomain containing 2
BST2	36.7425	6.21733	2.64568	5.85078	101.731	3.85939	1.72421	13.0684	-2.56308	0	0	bone marrow stromal cell antigen 2
BTG2	5.35485	2.50841	2.84858	7.67096	5.54501	2.09401	1.74533	3.68589	-1.09407	1.52239e-45	5.21481e-44	BTG family, member 2
BTK	0.423717	0.0920368	0.095885	0.340374	0.834893	0.0481374	0.124978	0.102995	-2.20282	1.60334e-11	1.58841e-10	Bruton agammaglobulinemia tyrosine kinase
BTN3A2	9.73173	3.77337	3.65103	6.39025	19.1539	2.03411	3.99519	5.29081	-1.36684	9.32377e-197	6.28111e-195	butyrophilin, subfamily 3, member A2
BTN3A3	7.14387	3.47832	3.40642	3.0573	14.9679	2.97261	3.47839	3.98395	-1.03832	9.21523e-79	4.39936e-77	butyrophilin, subfamily 3, member A3
C10orf10	32.7491	14.812	25.9611	10.8246	61.4616	14.1957	18.0035	12.2367	-1.14469	1.18045e-255	8.80872e-254	chromosome 10 open reading frame 10
C10orf55	8.02146	3.82129	4.34515	7.69023	12.029	1.64215	6.00313	3.8186	-1.0698	2.76201e-57	1.08214e-55	chromosome 10 open reading frame 55
C11orf21	0.237634	0.0543841	0.0936514	0.257164	0.362087	0	0.094324	0.0688284	-2.12748	1.71406e-05	9.08221e-05	chromosome 11 open reading frame 21
C15orf48	1.52863	0.492269	0.181871	0.305197	4.09883	0.461599	0.539954	0.475253	-1.63472	1.30094e-12	1.39234e-11	chromosome 15 open reading frame 48
C17orf72	2.99091	1.30065	1.34503	2.2987	5.329	1.22033	1.04622	1.63539	-1.20136	2.36856e-41	7.76015e-40	chromosome 17 open reading frame 72
C19orf38	0.556513	0.123272	0.0884211	0.296758	1.28436	0.134651	0.0921993	0.142966	-2.17457	2.70189e-07	1.80364e-06	chromosome 19 open reading frame 38
C1QA	28.1539	4.10698	3.89372	14.937	65.6311	1.0493	6.61823	4.65342	-2.77719	0	0	complement component 1, q subcomponent, A chain
C1QB	24.587	1.97338	1.89999	15.6168	56.2441	0.943053	3.06553	1.91155	-3.63915	0	0	complement component 1, q subcomponent, B chain
C1QC	16.9586	2.23061	2.94289	11.5592	36.3736	0.598006	2.16027	3.93354	-2.92651	9.73951e-258	7.35834e-256	complement component 1, q subcomponent, C chain
C1QTNF2	0.383818	0.181241	0.144617	0.370762	0.636076	0.384524	0.0942476	0.0649519	-1.08251	6.31765e-06	3.55159e-05	C1q and tumor necrosis factor related protein 2
C1orf162	1.09048	0.229334	0.567033	0.986777	1.71764	0.388345	0.191613	0.108043	-2.24945	6.45402e-11	6.11656e-10	chromosome 1 open reading frame 162
C1orf204	0.871937	0.401954	0.831618	0.575012	1.20918	0.368534	0.356296	0.481031	-1.11719	1.66145e-08	1.26273e-07	chromosome 1 open reading frame 204
C1orf226	0.172216	0.0525576	0.108701	0.224212	0.183734	0.0837518	0.0206619	0.0532591	-1.71225	3.03013e-06	1.7729e-05	chromosome 1 open reading frame 226
C2CD4A	0.227904	0.0161236	0.0167705	0.520636	0.146306	0	0.00728629	0.0410845	-3.82118	5.99689e-12	6.12881e-11	C2 calcium-dependent domain containing 4A
C2CD4B	0.396816	0.0534875	0.146635	0.492136	0.551677	0	0.079636	0.0808265	-2.8912	2.00048e-08	1.50483e-07	C2 calcium-dependent domain containing 4B
C3AR1	1.64796	0.526795	0.315222	1.05795	3.57071	0.2143	0.584198	0.781888	-1.64537	1.15063e-22	2.64002e-21	complement component 3a receptor 1
C5AR1	2.08697	0.729735	0.962495	2.47796	2.82047	1.11853	0.61118	0.459494	-1.51597	3.81051e-30	1.02909e-28	complement component 5a receptor 1
C5orf56	4.26036	1.97348	1.31577	2.30835	9.15697	1.7695	1.77736	2.37359	-1.11023	8.21828e-16	1.08027e-14	chromosome 5 open reading frame 56
C7	1.70436	0.152875	0.143968	4.1433	0.825806	0.01044	0.0531674	0.395017	-3.47881	6.01458e-86	2.97685e-84	complement component 7
C8orf4	0.376691	0.108249	0.0941462	0.570506	0.465422	0.045514	0.0409038	0.238328	-1.79903	1.12287e-05	6.09757e-05	chromosome 8 open reading frame 4
C9orf47	0.643324	0.271097	0.169138	1.08911	0.671724	0.423577	0.0948475	0.294867	-1.24674	6.00137e-16	8.38878e-15	chromosome 9 open reading frame 47
C9orf66	0.147835	0.0431047	0	0.144997	0.298507	0.0526327	0.0360392	0.0406421	-1.77807	0.000218206	0.00097189	chromosome 9 open reading frame 66
CA2	1.10871	0.373615	0.23119	0.65953	2.43541	0.188606	0.549938	0.382301	-1.56926	5.13111e-13	5.66923e-12	carbonic anhydrase II
CADM3	1.07417	0.253173	0.0937388	1.00936	2.11941	0.0849695	0.142544	0.532005	-2.08503	1.66138e-36	5.0302e-35	cell adhesion molecule 3
CARD16	3.59037	1.52038	1.32114	2.45148	6.99849	1.35415	1.05968	2.14732	-1.2397	3.19904e-14	3.83316e-13	caspase recruitment domain family, member 16
CASP1	4.04017	1.31754	1.04591	2.53608	8.53853	0.761928	0.969282	2.22142	-1.61657	9.31187e-55	3.52861e-53	caspase 1, apoptosis-related cysteine peptidase
CASP10	0.750078	0.320672	0.313926	0.774999	1.16131	0.279085	0.245898	0.437032	-1.22594	2.20082e-21	4.90572e-20	caspase 10, apoptosis-related cysteine peptidase
CCDC88C	0.228863	0.0693279	0.0434029	0.349176	0.294009	0.0860907	0.0299498	0.0919432	-1.72297	2.72664e-13	3.07279e-12	coiled-coil domain containing 88C
CCKAR	0.0648698	0.272639	0.114495	0.0576402	0.0224743	0.136995	0.664094	0.0168295	2.07137	7.01773e-06	3.91972e-05	cholecystokinin A receptor
CCL13	9.36074	0.262426	0.04526	1.91775	26.1192	0.049231	0.471939	0.266108	-5.15664	2.49458e-163	1.55523e-161	chemokine (C-C motif) ligand 13
CCL18	6.36819	0.495135	0.950401	11.1011	7.05307	0.435279	0.70088	0.349245	-3.68499	5.41516e-71	2.45016e-69	chemokine (C-C motif) ligand 18 (pulmonary and activation-regulated)
CCL2	62.766	10.8813	8.81697	18.473	161.008	7.71171	15.7429	9.18943	-2.52813	0	0	chemokine (C-C motif) ligand 2
CCL3	7.78484	1.5911	0.483872	2.21266	20.658	1.73688	1.70285	1.33357	-2.29064	7.81026e-71	3.52071e-69	chemokine (C-C motif) ligand 3
CCL4	5.68593	0.503548	0.144364	0.969024	15.9444	0.439684	0.752662	0.318297	-3.4972	2.28317e-63	9.56328e-62	chemokine (C-C motif) ligand 4
CCL5	5.94665	0.521992	0.219377	0.354987	17.2656	0.886319	0.449331	0.230327	-3.50998	1.50599e-126	8.57353e-125	chemokine (C-C motif) ligand 5
CCL7	3.99295	0.147468	0.0236296	0.158611	11.7966	0.128514	0.261792	0.0520992	-4.75898	4.15937e-67	1.80776e-65	chemokine (C-C motif) ligand 7
CCL8	16.0193	0.143	0.0154065	0.452437	47.59	0.117308	0.130527	0.181166	-6.80765	0	0	chemokine (C-C motif) ligand 8
CCR1	2.97509	0.609077	0.44619	2.32474	6.15433	0.430542	0.576879	0.81981	-2.28824	1.96998e-81	9.5361e-80	chemokine (C-C motif) receptor 1
CCR2	0.248653	0.0751856	0.0215114	0.15793	0.566517	0.0350983	0.0560766	0.134382	-1.7256	6.58365e-08	4.68918e-07	chemokine (C-C motif) receptor 2
CCR5	0.242413	0.0758447	0.0631241	0.0617915	0.602324	0.0686626	0.0274256	0.131446	-1.67635	2.78841e-08	2.0712e-07	chemokine (C-C motif) receptor 5 (gene/pseudogene)
CCRL2	0.716325	0.246418	0.0928848	0.5975	1.45859	0.37046	0.141245	0.22755	-1.5395	6.92567e-11	6.54565e-10	chemokine (C-C motif) receptor-like 2
CD14	12.7111	4.12025	3.04974	17.1874	17.8962	2.89975	6.12243	3.33856	-1.62529	5.23961e-132	3.03272e-130	CD14 molecule
CD163	6.11742	1.33121	0.83651	4.81284	12.7029	0.314967	1.98294	1.69573	-2.20018	7.89023e-234	5.72916e-232	CD163 molecule
CD163L1	0.696029	0.157844	0.264789	1.03679	0.786507	0.123438	0.136956	0.213138	-2.14065	6.82792e-27	1.7267e-25	CD163 molecule-like 1
CD177	0.122905	0.0187601	0.0162928	0.341761	0.0106604	0.0443059	0	0.0119743	-2.7118	0.000178097	0.000808279	CD177 molecule
CD180	0.385555	0.0831097	0.092212	0.386851	0.677602	0.0848714	0.0184908	0.145967	-2.21385	8.07903e-12	8.17749e-11	CD180 molecule
CD19	0.159467	0.0284491	0.0295068	0.255829	0.193064	0.0427943	0.00640993	0.036143	-2.4868	0.00012273	0.000571407	CD19 molecule
CD1D	0.227879	0.0725177	0.0712698	0.375878	0.23649	0.0110747	0.0530823	0.153396	-1.65187	7.81903e-06	4.3383e-05	CD1d molecule
CD2	0.313618	0.0214479	0.0251576	0.0844336	0.831262	0.0273649	0	0.0369787	-3.8701	9.47289e-10	8.08992e-09	CD2 molecule
CD209	0.35719	0.0595103	0.0348091	0.131429	0.905331	0.0425961	0.0623845	0.0735502	-2.58548	9.56857e-21	2.09438e-19	CD209 molecule
CD24	0.277058	0.784044	0.300356	0.363195	0.167623	1.74885	0.512388	0.0908948	1.50075	6.71516e-07	4.28118e-06	CD24 molecule
CD247	0.213645	0.0510997	0.0114563	0.0672869	0.562193	0.112154	0.00746617	0.033679	-2.06383	2.83459e-05	0.000146047	CD247 molecule
CD27	1.97369	0.964816	1.09421	2.32584	2.50103	0.729999	1.10293	1.06152	-1.03257	9.94626e-09	7.73626e-08	CD27 molecule
CD274	1.85877	0.291906	0.39185	0.350699	4.83377	0.340984	0.292825	0.241909	-2.67077	2.03277e-89	1.02706e-87	CD274 molecule
CD28	0.146827	0.020767	0.0433564	0.152126	0.244998	0.00857462	0.0102748	0.0434515	-2.82175	7.67245e-10	6.62886e-09	CD28 molecule
CD300A	1.54469	0.370218	0.42728	1.84376	2.36303	0.254516	0.497252	0.358887	-2.06087	9.91365e-25	2.40426e-23	CD300a molecule
CD300C	0.473991	0.18995	0.157754	0.621088	0.643131	0.105597	0.205618	0.258636	-1.31924	0.000168443	0.000767871	CD300c molecule
CD300LF	0.673136	0.0916959	0.032845	0.303144	1.68342	0.10718	0.071351	0.0965568	-2.87597	6.09059e-18	1.21272e-16	CD300 molecule-like family member f
CD300LG	0.111162	0.0244459	0.0272933	0.174043	0.132149	0.0118752	0.0213446	0.040118	-2.18499	0.000146896	0.000675742	CD300 molecule-like family member g
CD33	0.502722	0.0766229	0.0598078	0.250908	1.19745	0.0260221	0.124727	0.0791196	-2.71391	3.74165e-11	3.60662e-10	CD33 molecule
CD34	0.408773	0.0913505	0.102765	0.603572	0.519983	0.0298083	0.0982262	0.146017	-2.16182	7.53093e-11	7.10109e-10	CD34 molecule
CD36	1.60224	0.775433	0.397441	2.48913	1.92016	0.598288	0.212762	1.51525	-1.04702	3.73378e-29	9.89636e-28	CD36 molecule (thrombospondin receptor)
CD38	1.35667	0.261393	0.20666	1.38718	2.47618	0.168594	0.159934	0.45565	-2.37578	2.31259e-22	5.29603e-21	CD38 molecule
CD3D	0.371641	0	0	0.0436126	1.07131	0	0	0	#NAME?	1.78433e-07	1.21487e-06	CD3d molecule, delta (CD3-TCR complex)
CD3E	0.115746	0.00276507	0	0.0640786	0.28316	0	0.0082952	0	-5.38751	0.000102329	0.000482065	CD3e molecule, epsilon (CD3-TCR complex)
CD4	5.38555	2.4722	3.32306	4.57059	8.26299	1.80731	2.47452	3.13478	-1.1233	3.59198e-64	1.515e-62	CD4 molecule
CD40	7.00259	3.0355	1.85908	5.3395	13.8092	2.087	2.36878	4.65072	-1.20596	5.5096e-51	2.01841e-49	CD40 molecule, TNF receptor superfamily member 5
CD40LG	0.125328	0.0038094	0	0.0528919	0.323093	0.0114282	0	0	-5.04	3.00251e-06	1.75844e-05	CD40 ligand
CD48	0.828039	0.244666	0.212183	0.500184	1.77175	0.120895	0.316071	0.297033	-1.75888	1.09672e-12	1.18003e-11	CD48 molecule
CD52	10.2073	0.93843	2.28809	3.00772	25.326	2.23996	0.323086	0.252243	-3.4432	1.15593e-87	5.78011e-86	CD52 molecule
CD53	4.28873	1.01677	0.733418	3.00738	9.12538	0.836368	0.840307	1.37363	-2.07656	1.52032e-65	6.52579e-64	CD53 molecule
CD6	0.0931362	0.00822193	0	0.0687595	0.210649	0.0127342	0.00762957	0.00430201	-3.50179	7.9325e-06	4.39221e-05	CD6 molecule
CD74	176.036	17.3388	16.1764	40.5452	471.387	14.5052	18.8446	18.6666	-3.3438	0	0	CD74 molecule, major histocompatibility complex, class II invariant chain
CD79A	1.35006	0.244502	0.321479	2.28633	1.44236	0.166517	0.229463	0.337527	-2.4651	2.0763e-17	4.01551e-16	CD79a molecule, immunoglobulin-associated alpha
CD79B	0.707461	0.220447	0.228538	1.17609	0.717756	0.198872	0.148939	0.313529	-1.68222	7.29614e-07	4.62604e-06	CD79b molecule, immunoglobulin-associated beta
CD80	0.383124	0.112626	0.0838221	0.252018	0.813532	0.159559	0.0910456	0.0872729	-1.76627	3.31221e-10	2.94457e-09	CD80 molecule
CD82	7.36183	2.88771	4.47572	6.26846	11.3413	2.76248	3.14694	2.75372	-1.35014	8.02314e-59	3.21085e-57	CD82 molecule
CD83	2.04367	0.815966	0.718074	1.42933	3.98361	0.938954	0.537671	0.971272	-1.32458	4.24403e-29	1.1212e-27	CD83 molecule
CD84	1.20822	0.386476	0.323334	1.19642	2.10492	0.531349	0.275905	0.352174	-1.64444	2.33421e-71	1.0601e-69	CD84 molecule
CD86	0.89363	0.178225	0.0922703	0.945619	1.643	0.136211	0.141742	0.256722	-2.32598	8.00823e-28	2.07274e-26	CD86 molecule
CDH5	1.69343	0.683247	0.363889	2.03938	2.67702	0.218206	0.532064	1.29947	-1.30947	2.59623e-31	7.14685e-30	cadherin 5, type 2 (vascular endothelium)
CDO1	4.39962	1.40209	1.43183	5.71654	6.05048	0.804686	1.17419	2.2274	-1.6498	6.43281e-43	2.14592e-41	cysteine dioxygenase, type I
CECR1	1.13898	0.442491	0.396042	1.15704	1.86387	0.373697	0.357612	0.596163	-1.36403	3.85542e-24	9.212e-23	cat eye syndrome chromosome region, candidate 1
CH25H	6.65705	2.9689	1.42549	3.95167	14.594	2.69068	2.47734	3.73869	-1.16495	2.53841e-43	8.49125e-42	cholesterol 25-hydroxylase
CHI3L1	23.9907	6.45067	10.4206	6.14849	55.4029	9.55594	5.34273	4.45334	-1.89495	0	0	chitinase 3-like 1 (cartilage glycoprotein-39)
CHI3L2	2.11246	0.393863	0.20322	2.63791	3.49626	0.299069	0.381739	0.50078	-2.42316	3.87578e-36	1.16475e-34	chitinase 3-like 2
CHIT1	0.432377	0.0663426	0.554573	0.0764898	0.666068	0.0991612	0.00495094	0.0949158	-2.70428	1.45924e-13	1.67484e-12	chitinase 1 (chitotriosidase)
CHL1	4.49276	1.7775	0.669322	6.11751	6.69145	0.688154	0.737359	3.907	-1.33775	7.25863e-213	5.1025e-211	cell adhesion molecule with homology to L1CAM (close homolog of L1)
CHRD	1.12575	0.539316	0.55242	0.509398	2.31542	0.160634	0.769934	0.687381	-1.06168	5.94852e-14	6.9929e-13	chordin
CHRDL1	14.0771	6.7945	4.81569	9.43323	27.9825	2.45793	3.08108	14.8445	-1.05091	3.38501e-201	2.29311e-199	chordin-like 1
CHST8	0.236224	0.0326035	0.0132906	0.591028	0.104353	0.00722837	0.0173232	0.0732589	-2.85706	4.2977e-08	3.12808e-07	carbohydrate (N-acetylgalactosamine 4-0) sulfotransferase 8
CIITA	2.14058	0.324446	0.198623	0.670087	5.55304	0.621143	0.0997794	0.252417	-2.72195	1.29345e-140	7.72631e-139	class II, major histocompatibility complex, transactivator
CISH	0.978966	0.385487	0.339649	1.09718	1.50007	0.434104	0.354163	0.368194	-1.34458	2.21469e-12	2.32816e-11	cytokine inducible SH2-containing protein
CLC	1.21474	0.0521723	0.0304236	0.229741	3.38405	0	0	0.156517	-4.54122	2.07728e-16	3.84272e-15	Charcot-Leyden crystal protein
CLCA2	0.441223	0.196087	0.129217	0.831214	0.363238	0.07288	0.0405463	0.474836	-1.17001	5.15687e-07	3.3315e-06	chloride channel accessory 2
CLDN23	5.45504	2.6815	2.03236	4.81774	9.51501	1.99605	1.80673	4.24173	-1.02455	8.694e-37	2.6555e-35	claudin 23
CLDN5	1.4751	0.474669	0.183094	2.27643	1.96578	0.108632	0.428479	0.886895	-1.63582	2.29657e-20	4.99071e-19	claudin 5
CLEC14A	1.72806	0.6481	0.365506	2.04451	2.77415	0.114855	0.492286	1.33716	-1.41486	8.30837e-21	1.82019e-19	C-type lectin domain family 14, member A
CLEC2B	1.04768	0.317079	0.264587	1.0545	1.82394	0.174736	0.227857	0.548644	-1.72428	6.4865e-16	8.76564e-15	C-type lectin domain family 2, member B
CLEC4A	0.412711	0.160485	0.16537	0.315349	0.757414	0.277996	0.137165	0.0662933	-1.3627	0.000139339	0.000643175	C-type lectin domain family 4, member A
CLEC5A	0.287899	0.0581767	0.065821	0.151874	0.646001	0.035798	0.0500453	0.0886869	-2.30705	8.07903e-12	8.17749e-11	C-type lectin domain family 5, member A
CLEC7A	1.25918	0.283174	0.218522	0.621025	2.93799	0.191689	0.284824	0.373009	-2.15272	7.37713e-35	2.16598e-33	C-type lectin domain family 7, member A
CLIC2	0.51788	0.163638	0.0501887	0.415091	1.08836	0.101386	0.168214	0.221315	-1.66211	3.61653e-11	3.49157e-10	chloride intracellular channel 2
CMKLR1	1.52874	0.719308	0.624328	1.21462	2.74727	0.320896	1.17145	0.665578	-1.08766	1.56174e-28	4.08579e-27	chemokine-like receptor 1
CMPK2	3.43969	0.348553	0.157777	0.284233	9.87706	0.227145	0.160285	0.658228	-3.30283	4.9342e-227	3.54036e-225	cytidine monophosphate (UMP-CMP) kinase 2, mitochondrial
COBL	0.0514185	0.137834	0.0652818	0.0699896	0.018984	0.00394497	0.382901	0.0266546	1.42257	1.05045e-06	6.53724e-06	cordon-bleu WH2 repeat protein
COL10A1	0.908434	2.32121	0.684863	1.82213	0.218308	2.27943	3.8453	0.838892	1.35342	0	0	collagen, type X, alpha 1
COL11A1	27.1159	63.8557	51.894	12.7939	16.6598	16.0373	122.697	52.8327	1.23568	6.66134e-16	8.76564e-15	collagen, type XI, alpha 1
COL15A1	6.81253	3.22721	6.70234	7.78122	5.95403	1.18609	5.34478	3.15076	-1.0779	7.74791e-79	3.70616e-77	collagen, type XV, alpha 1
COL28A1	0.247135	0.0746469	0.0876614	0.478089	0.175656	0.0893932	0.0499883	0.0845593	-1.72715	2.0275e-06	1.212e-05	collagen, type XXVIII, alpha 1
COL9A3	0.69905	0.170407	0.457235	1.13792	0.501996	0.118016	0.17677	0.216434	-2.03641	3.62299e-13	4.04907e-12	collagen, type IX, alpha 3
COLEC12	3.2746	1.13132	0.467013	6.04783	3.30897	1.72448	0.612714	1.05678	-1.53331	1.03099e-61	4.23791e-60	collectin sub-family member 12
CORO1A	1.87468	0.665629	0.408475	1.18702	4.02855	0.769423	0.422034	0.805431	-1.49385	3.32323e-25	8.15739e-24	coronin, actin binding protein, 1A
CP	3.68332	0.684191	0.5741	2.20469	8.27118	0.616465	0.530038	0.906069	-2.42854	1.10293e-215	7.79834e-214	ceruloplasmin (ferroxidase)
CPA3	1.42346	0.305528	0.446002	1.73675	2.08763	0.0621966	0.812363	0.0420238	-2.22003	2.39356e-20	5.18755e-19	carboxypeptidase A3 (mast cell)
CPNE5	0.358381	0.105315	0.103817	0.469414	0.501911	0.1192	0.0526232	0.144122	-1.76678	4.60157e-10	4.05218e-09	copine V
CPNE7	0.257703	0.895236	0.268179	0.182444	0.322485	2.50711	0.0614069	0.117192	1.79656	1.68951e-08	1.28204e-07	copine VII
CPVL	1.4946	0.385205	0.454661	2.34339	1.68575	0.200176	0.430348	0.525092	-1.95606	6.92677e-20	1.46843e-18	carboxypeptidase, vitellogenic-like
CPXM1	2.10812	0.488439	0.401211	2.5315	3.39166	0.139652	0.240554	1.08511	-2.10971	1.06033e-43	3.56659e-42	carboxypeptidase X (M14 family), member 1
CR1	0.0673239	0.0185075	0.0193238	0.123223	0.0594249	0.0147135	0.0251869	0.0156221	-1.86301	1.99045e-05	0.000104894	complement component (3b/4b) receptor 1 (Knops blood group)
CRABP2	12.1009	5.70444	20.0688	8.63451	7.59934	4.5171	5.4343	7.16192	-1.08496	4.29489e-31	1.17961e-29	cellular retinoic acid binding protein 2
CRHBP	0.351301	0.0806352	0.0104778	0.597811	0.445615	0.205147	0.0136568	0.0231017	-2.12323	8.52482e-08	5.99954e-07	corticotropin releasing hormone binding protein
CSF1	8.90963	4.05424	4.87428	5.98012	15.8745	7.2369	1.85897	3.06686	-1.13593	1.86462e-208	1.29573e-206	colony stimulating factor 1 (macrophage)
CSF1R	1.21732	0.595175	0.59382	1.23548	1.82265	0.682681	0.58836	0.514483	-1.03232	1.25964e-17	2.47159e-16	colony stimulating factor 1 receptor
CSF2	0.935534	0	0	0.0617521	2.74485	0	0	0	#NAME?	1.64965e-18	3.3535e-17	colony stimulating factor 2 (granulocyte-macrophage)
CSF2RB	1.08088	0.258436	0.26626	0.893618	2.08277	0.276653	0.189062	0.309592	-2.06433	5.422e-49	1.95968e-47	colony stimulating factor 2 receptor, beta, low-affinity (granulocyte-macrophage)
CSF3R	0.22138	0.0586989	0.0938075	0.245387	0.324944	0.0600224	0.0755196	0.0405548	-1.91512	6.63693e-07	4.23353e-06	colony stimulating factor 3 receptor (granulocyte)
CST7	0.59698	0.194437	0.124246	0.677614	0.98908	0.225245	0.175439	0.182627	-1.61838	8.86365e-05	0.000422593	cystatin F (leukocystatin)
CTSC	10.9416	4.12902	1.66484	15.7642	15.3958	5.80647	1.85716	4.72344	-1.40595	0	0	cathepsin C
CTSG	1.14165	0.144812	0.270948	1.50393	1.65008	0.113354	0.244493	0.0765888	-2.97887	3.38196e-14	4.04634e-13	cathepsin G
CTSH	5.97214	2.00717	0.894822	6.3981	10.6235	1.21314	2.42561	2.38276	-1.57309	1.09004e-53	4.10492e-52	cathepsin H
CTSL1	137.098	61.4551	58.8418	163.244	189.208	60.0691	46.2118	78.0844	-1.1576	0	0	cathepsin L1
CTSS	9.50988	2.36193	1.75841	6.19664	20.5746	2.32073	2.49057	2.2745	-2.00946	0	0	cathepsin S
CX3CL1	0.658774	0.0842127	0.16475	0.236971	1.5746	0.00640019	0.103534	0.142704	-2.96767	7.55532e-30	2.03139e-28	chemokine (C-X3-C motif) ligand 1
CXCL13	7.31457	1.05042	0.50084	4.48696	16.9559	1.31802	0.800208	1.03302	-2.79981	3.3976e-117	1.86422e-115	chemokine (C-X-C motif) ligand 1 (melanoma growth stimulating activity, alpha)
CXCL10	30.972	0.095962	0	0.0797293	92.8362	0.0344536	0.0206425	0.23279	-8.33428	0	0	chemokine (C-X-C motif) ligand 10
CXCL11	10.6934	0.0366588	0.0240576	0.0706492	31.9856	0.0392526	0	0.0707239	-8.18835	0	0	chemokine (C-X-C motif) ligand 11
CXCL16	11.7742	4.66916	4.16001	15.8822	15.2805	2.33239	4.71041	6.96467	-1.3344	4.41989e-117	2.41967e-115	chemokine (C-X-C motif) ligand 16
CXCL2	5.75766	1.52611	1.45677	4.56682	11.2494	2.15921	1.32496	1.09417	-1.91562	6.59474e-61	2.69706e-59	chemokine (C-X-C motif) ligand 2
CXCL3	3.51036	1.16124	0.467673	3.06913	6.99427	1.74414	0.892586	0.847007	-1.59595	6.64768e-31	1.81963e-29	chemokine (C-X-C motif) ligand 3
CXCL6	1.34754	0.38519	0.185732	1.82136	2.03554	0.252535	0.143738	0.759296	-1.80669	2.78062e-17	5.3478e-16	chemokine (C-X-C motif) ligand 6
CXCL9	19.9701	0.0416491	0	0.165077	59.7452	0.0329239	0.0197259	0.0722975	-8.90534	0	0	chemokine (C-X-C motif) ligand 9
CXCR4	2.02195	0.550323	0.480252	2.93351	2.6521	0.229851	0.701083	0.720034	-1.8774	1.35464e-28	3.5555e-27	chemokine (C-X-C motif) receptor 4
CXCR6	0.314668	0.112769	0.147912	0.099284	0.696808	0.150163	0.115674	0.0724712	-1.48045	2.78931e-05	0.000143806	chemokine (C-X-C motif) receptor 6
CYBB	4.52126	1.4142	0.811713	2.01326	10.7388	1.07213	1.91835	1.25213	-1.67673	4.05777e-141	2.44191e-139	cytochrome b-245, beta polypeptide
CYGB	27.4798	11.8911	8.1887	27.8857	46.3651	9.87429	8.84223	16.9569	-1.20849	9.82345e-252	7.30792e-250	cytoglobin
CYP27C1	0.149935	0.460495	0.250746	0.13451	0.0645496	0.885307	0.254495	0.241684	1.61885	1.28655e-10	1.18999e-09	cytochrome P450, family 27, subfamily C, polypeptide 1
CYTH4	1.40829	0.373705	0.282305	1.12769	2.81486	0.333776	0.403956	0.383383	-1.91397	1.89085e-37	5.86405e-36	cytohesin 4
CYTIP	1.104	0.352191	0.261423	1.47693	1.57365	0.341231	0.215803	0.499539	-1.64831	8.27634e-17	1.55475e-15	cytohesin 1 interacting protein
CYTL1	4.01004	0.544151	0.154065	0.371645	11.5044	0.335165	0.702836	0.594452	-2.88154	3.2753e-57	1.28117e-55	cytokine-like 1
DACT1	8.72728	21.9302	17.2733	5.4473	3.46123	20.03	28.6029	17.1578	1.32932	0	0	dishevelled-binding antagonist of beta-catenin 1
DAPP1	0.156416	0.0397641	0.0131141	0.181556	0.274579	0	0.0470061	0.0722861	-1.97585	0.000123054	0.000572695	dual adaptor of phosphotyrosine and 3-phosphoinositides
DCSTAMP	0.459537	0.0516768	0.398176	0.32594	0.654495	0.0528185	0.0379747	0.0642373	-3.15259	2.04332e-12	2.15455e-11	dendrocyte expressed seven transmembrane protein
DDX3Y	0.00175191	3.40231	0	0	0.00525573	0.00873735	10.1923	0.00590349	10.9234	0	0	DEAD (Asp-Glu-Ala-Asp) box polypeptide 3, Y-linked
DDX60	3.70263	1.40284	0.964016	1.5166	8.62726	1.11413	1.11805	1.97633	-1.4002	1.07851e-131	6.22763e-130	DEAD (Asp-Glu-Ala-Asp) box polypeptide 60
DEF6	0.71402	0.160199	0.234855	0.710804	1.1964	0.0638653	0.163989	0.252743	-2.1561	1.73438e-15	2.2267e-14	differentially expressed in FDCP 6 homolog (mouse)
DENND2D	0.830387	0.401974	0.565935	0.771626	1.1536	0.40842	0.425565	0.371937	-1.04668	1.52544e-10	1.40292e-09	DENN/MADD domain containing 2D
DERL3	1.77575	0.430763	0.860597	2.93882	1.52782	0.569518	0.262779	0.459993	-2.04346	5.18055e-45	1.76459e-43	derlin 3
DHRS9	0.149317	0.0272917	0.0159598	0.0491004	0.382892	0.0115734	0.0312032	0.0390984	-2.45185	2.319e-07	1.55661e-06	dehydrogenase/reductase (SDR family) member 9
DHX58	3.52833	1.28517	1.14062	2.00051	7.44385	1.18467	1.36201	1.30882	-1.45703	1.4731e-55	5.66177e-54	DEXH (Asp-Glu-X-His) box polypeptide 58
DIO2	0.289356	0.126171	0.220797	0.315182	0.332089	0.143478	0.123339	0.111695	-1.19747	1.88939e-08	1.42569e-07	deiodinase, iodothyronine, type II
DIRAS3	1.46858	0.719748	0.661223	2.19938	1.54514	0.141279	0.846456	1.17151	-1.02886	7.12431e-07	4.52064e-06	DIRAS family, GTP-binding RAS-like 3
DLL4	0.83229	0.310306	0.0957275	0.614211	1.78693	0.0306254	0.403675	0.496618	-1.42339	3.19576e-16	5.5202e-15	delta-like 4 (Drosophila)
DMKN	4.12848	1.75122	3.1135	4.7405	4.53145	0.602993	2.91495	1.73572	-1.23725	4.21559e-33	1.20137e-31	dermokine
DNASE1L3	2.12937	0.549054	0.34006	1.14131	4.90674	0.0389364	0.384917	1.22331	-1.95541	3.51571e-20	7.55879e-19	deoxyribonuclease I-like 3
DOCK5	4.0666	8.28823	4.49144	5.89875	1.80962	20.1548	2.09648	2.61341	1.02724	0	0	dedicator of cytokinesis 5
DOCK8	0.475412	0.127021	0.0513208	0.4263	0.948614	0.103274	0.113717	0.164073	-1.90411	1.14129e-30	3.10645e-29	dedicator of cytokinesis 8
DOK2	0.901429	0.248182	0.141444	0.775972	1.78687	0.213029	0.28363	0.247888	-1.86081	8.09595e-14	9.44865e-13	docking protein 2, 56kDa
DOK3	0.524735	0.255187	0.18211	0.60642	0.785676	0.352844	0.174314	0.238403	-1.04004	6.55477e-08	4.67136e-07	docking protein 3
DSG2	0.167643	0.382412	0.136268	0.308706	0.0579543	0.767061	0.277522	0.102653	1.18974	1.89402e-06	1.13782e-05	desmoglein 2
DSP	4.64859	9.61443	7.43605	4.02716	2.48257	19.9596	5.65875	3.22493	1.04841	2.22045e-16	3.87412e-15	desmoplakin
DUSP4	2.00671	0.634254	0.574517	4.03467	1.41094	0.713384	0.529995	0.659384	-1.6617	6.53378e-84	3.20764e-82	dual specificity phosphatase 4
DUSP5	8.99193	3.90449	3.30618	10.0671	13.6025	6.47161	2.48729	2.75458	-1.20349	6.24056e-109	3.37073e-107	dual specificity phosphatase 5
EAF2	1.17395	0.434766	0.547535	1.10892	1.86538	0.225908	0.356832	0.721557	-1.43305	4.04367e-07	2.64546e-06	ELL associated factor 2
EDNRB	2.54398	0.712551	0.431832	3.9158	3.2843	0.374914	0.58351	1.17923	-1.83602	1.60389e-84	7.90602e-83	endothelin receptor type B
EFNA1	1.16337	0.357478	0.332037	1.58902	1.56904	0.12039	0.400723	0.551322	-1.70238	4.79793e-12	4.94305e-11	ephrin-A1
EFNA5	0.49765	1.12204	0.490929	0.678444	0.323577	2.55222	0.232898	0.581001	1.17292	6.00453e-12	6.13403e-11	ephrin-A5
EGFL6	0.82269	0.2097	0.0791864	0.425223	1.96366	0.0258402	0.288995	0.314266	-1.97202	5.59248e-18	1.11537e-16	EGF-like-domain, multiple 6
EIF1AY	0.00302173	1.48079	0	0	0.00906519	0	4.44238	0	8.93678	0	0	eukaryotic translation initiation factor 1A, Y-linked
ELMO1	0.175593	0.0670191	0.0373721	0.274976	0.21443	0.0469051	0.0337232	0.120429	-1.38959	7.09712e-07	4.50456e-06	engulfment and cell motility 1
EMILIN2	4.66363	2.20275	1.70532	4.7359	7.54968	1.98557	1.73123	2.89145	-1.08215	3.43296e-68	1.52205e-66	elastin microfibril interfacer 2
EMR2	0.329099	0.151855	0.190586	0.397278	0.399432	0.171677	0.159139	0.12475	-1.11582	1.04335e-08	8.10481e-08	egf-like module containing, mucin-like, hormone receptor-like 2
ENSG00000110347.7	0.47177	0.0734344	0.194734	0.335381	0.885195	0.0780387	0.00667942	0.135585	-2.68356	1.1834e-11	1.18447e-10	ENSG00000110347.7
ENSG00000130600.11	5.55358	11.316	3.25991	4.63148	8.76934	1.95175	17.5004	14.4959	1.02688	0	0	ENSG00000130600.11
ENSG00000152268.8	8.58614	2.76175	1.72466	14.1727	9.86106	2.97928	1.86735	3.43863	-1.63643	6.25863e-293	4.81855e-291	ENSG00000152268.8
ENSG00000152931.7	0.0274991	0.0954011	0.0217227	0.0530221	0.00775263	0.221249	0.0141568	0.0507974	1.79462	3.37904e-05	0.000171944	ENSG00000152931.7
ENSG00000176728.3	0	0.209177	0	0	0	0	0.627532	0	Inf	2.22045e-16	3.87412e-15	ENSG00000176728.3
ENSG00000179428.2	2.6281	0.529477	0.875369	1.54003	5.46889	0.568232	0.542879	0.477321	-2.31138	1.58208e-38	4.9444e-37	ENSG00000179428.2
ENSG00000204792.2	0.176261	0.572159	0.00922324	0.112212	0.407347	1.37947	0.0150271	0.321981	1.69871	3.34787e-07	2.2096e-06	ENSG00000204792.2
ENSG00000206028.1	0.20333	0.0643274	0.0810713	0.321562	0.207358	0.0962012	0.0480315	0.0487495	-1.66032	0.000111625	0.000523216	ENSG00000206028.1
ENSG00000224298.2	3.02781	0.671736	0.169327	1.13659	7.77752	0.724455	0.676822	0.613932	-2.17231	9.70885e-56	3.75533e-54	ENSG00000224298.2
ENSG00000224318.1	4.21495	1.22105	0.392578	6.13034	6.12193	0.450746	0.952313	2.26009	-1.78739	4.21598e-26	1.04868e-24	ENSG00000224318.1
ENSG00000224397.1	0.351189	0.0873915	0.141431	0.290075	0.622062	0.179479	0.0307237	0.0519717	-2.00668	1.5096e-09	1.26825e-08	ENSG00000224397.1
ENSG00000225670.2	0.574088	0.151977	0.0113819	0.549121	1.16176	0.049522	0.0927204	0.313688	-1.91742	4.2581e-17	8.11851e-16	ENSG00000225670.2
ENSG00000226585.1	0.163246	0.373225	0.238955	0.224282	0.0264997	0.854653	0.0923811	0.172641	1.193	2.94438e-05	0.000151351	ENSG00000226585.1
ENSG00000226751.1	0.281832	0	0.0277095	0.255746	0.562042	0	0	0	#NAME?	5.05236e-05	0.000250316	ENSG00000226751.1
ENSG00000226876.2	0.732888	2.1065	1.06069	0.834345	0.303629	4.97555	0.540045	0.803906	1.52318	3.41222e-05	0.000173494	ENSG00000226876.2
ENSG00000228318.1	6.99675	1.55026	0.867483	0.960774	19.162	0.226463	0.701026	3.72329	-2.17418	8.41479e-41	2.73927e-39	ENSG00000228318.1
ENSG00000230184.1	0.113027	1.1378	0.16004	0.179041	0	3.19149	0.104299	0.11762	3.33151	8.38221e-05	0.000401863	ENSG00000230184.1
ENSG00000231083.1	3.42529	1.34393	1.67017	4.74745	3.85824	1.11227	1.26617	1.65334	-1.34977	1.38477e-09	1.16609e-08	ENSG00000231083.1
ENSG00000231106.1	0.363824	2.59599	0.213715	0.458255	0.419502	0.103318	3.23438	4.45027	2.83497	0	0	ENSG00000231106.1
ENSG00000231486.3	797.581	157.741	161.814	1195.1	1035.83	81.467	94.0416	297.713	-2.33808	0	0	ENSG00000231486.3
ENSG00000231528.2	0.871268	0.408471	0.397791	0.739052	1.47696	0.679945	0.234553	0.310916	-1.09288	1.37005e-24	3.3094e-23	ENSG00000231528.2
ENSG00000232934.3	0.725486	0.307401	0.233541	0.602928	1.33999	0.175868	0.1522	0.594135	-1.23883	6.48952e-05	0.000315968	ENSG00000232934.3
ENSG00000232993.1	5.94817	2.3077	8.86616	4.01367	4.96469	1.61482	2.33813	2.97014	-1.36599	7.28834e-11	6.8777e-10	ENSG00000232993.1
ENSG00000233864.3	0	0.630223	0	0	0	0	1.89067	0	Inf	0	0	ENSG00000233864.3
ENSG00000234661.1	2.88302	1.16909	0.232026	4.44225	3.97478	0.619486	0.329918	2.55788	-1.30219	4.19057e-13	4.66405e-12	ENSG00000234661.1
ENSG00000235096.1	0.210405	1.09648	0.191759	0.367761	0.0716962	2.86058	0.267794	0.161065	2.38164	8.40188e-06	4.64151e-05	ENSG00000235096.1
ENSG00000235385.1	0.356223	0.0954498	0.235006	0.40474	0.428923	0.107632	0.0241823	0.154535	-1.89997	1.71406e-05	9.08221e-05	ENSG00000235385.1
ENSG00000235897.1	1.89084	0.443069	0.640134	0.484149	4.54825	0.970896	0.099888	0.258423	-2.09343	1.3662e-45	4.69309e-44	ENSG00000235897.1
ENSG00000236199.1	0.544252	1.80161	0.550232	0.692506	0.390019	2.99254	1.16542	1.24687	1.72694	6.33779e-05	0.000309015	ENSG00000236199.1
ENSG00000236700.1	0.18758	0.0125057	0.0596458	0.0250228	0.478072	0.0162197	0.00485894	0.0164386	-3.90684	9.47289e-10	8.08992e-09	ENSG00000236700.1
ENSG00000237568.1	14.1924	0.10727	0.0594387	0.398975	42.1187	0.0646537	0.0387365	0.21842	-7.04772	4.63285e-108	2.49126e-106	ENSG00000237568.1
ENSG00000237989.1	0.168581	0.0288339	0.0275313	0.167475	0.310737	0.0224601	0.0134567	0.0505848	-2.54761	9.43157e-07	5.89674e-06	ENSG00000237989.1
ENSG00000238164.2	0.796943	0.35568	0.338908	0.721431	1.33049	0.331096	0.323122	0.412823	-1.1639	8.30723e-21	1.82019e-19	ENSG00000238164.2
ENSG00000241956.5	0.266638	0.130901	0.428366	0.205383	0.166166	0.252945	0.0677982	0.0719599	-1.02641	3.7719e-06	2.17948e-05	ENSG00000241956.5
ENSG00000242094.1	0.300816	0.845966	0.533285	0.237423	0.131739	1.74614	0.595792	0.195967	1.49172	1.49392e-12	1.59045e-11	ENSG00000242094.1
ENSG00000242125.2	71.4419	163.507	78.5965	74.7606	60.9687	46.5177	188.778	255.226	1.19451	4.44089e-16	6.23989e-15	ENSG00000242125.2
ENSG00000242258.1	0.152178	0.00869253	0.00887062	0.0297715	0.417892	0	0	0.0260776	-4.12984	1.55549e-07	1.06595e-06	ENSG00000242258.1
ENSG00000244203.2	0.183385	0.884426	0.357651	0.138501	0.0540026	1.82545	0.484096	0.343731	2.26987	1.29142e-05	6.95832e-05	ENSG00000244203.2
ENSG00000245105.1	1.28651	0.52939	1.04788	1.25603	1.55563	0.316085	0.579613	0.692472	-1.28106	1.22269e-11	1.22229e-10	ENSG00000245105.1
ENSG00000248187.1	0.260606	0.0862776	0.0593288	0.248898	0.47359	0.206509	0	0.0523239	-1.59481	8.5225e-05	0.00040799	ENSG00000248187.1
ENSG00000248265.1	0.150603	0.334309	0.146561	0.0942783	0.210969	0.286956	0.382059	0.333913	1.15044	2.58624e-05	0.00013402	ENSG00000248265.1
ENSG00000249623.1	0.817351	2.76122	1.76246	0.577089	0.112505	7.06053	0.812429	0.410708	1.75628	1.81591e-06	1.09252e-05	ENSG00000249623.1
ENSG00000250033.1	0.59067	1.19693	0.787704	0.569127	0.41518	1.58443	0.605022	1.40135	1.01892	0	0	ENSG00000250033.1
ENSG00000251037.1	0	3.6583	0	0	0	0	10.9749	0	Inf	0	0	ENSG00000251037.1
ENSG00000251301.2	0.694439	0.28451	0.393023	1.1152	0.575093	0.0855012	0.442416	0.325612	-1.28737	3.54425e-07	2.33257e-06	ENSG00000251301.2
ENSG00000253139.1	0.221506	0.952153	0.357875	0.262739	0.0439046	2.23833	0.437304	0.180824	2.10385	8.25736e-06	4.56375e-05	ENSG00000253139.1
ENSG00000253364.1	105.793	25.2415	43.6103	149.822	123.947	5.11307	12.3077	58.3038	-2.06737	0	0	ENSG00000253364.1
ENSG00000253701.1	0.675421	0.0194501	0	1.71037	0.315893	0.0583504	0	0	-5.11794	1.23166e-05	6.65556e-05	ENSG00000253701.1
ENSG00000254287.1	9.90482	0.0308811	0	0.160249	29.5542	0.0692489	0	0.0233944	-8.32526	6.16149e-144	3.74507e-142	ENSG00000254287.1
ENSG00000254418.1	13.165	3.78842	2.64799	20.9387	15.9083	4.9751	2.14407	4.24608	-1.79704	4.85372e-24	1.15066e-22	ENSG00000254418.1
ENSG00000254693.1	4.19059	1.50804	2.23437	3.42215	6.91525	1.85174	1.52549	1.14689	-1.47448	2.86766e-14	3.44631e-13	ENSG00000254693.1
ENSG00000254829.1	0.7187	0.155798	0.168438	0.518202	1.46946	0.183217	0.0365908	0.247585	-2.20572	3.6088e-06	2.09029e-05	ENSG00000254829.1
ENSG00000256262.1	1.95863	0.55058	0.38164	0.788218	4.70602	0.255461	0.55483	0.84145	-1.83082	8.18813e-12	8.28446e-11	ENSG00000256262.1
ENSG00000257452.1	1.73697	0.166782	0.0334924	0.224814	4.95259	0.109293	0.0218272	0.369225	-3.38054	9.70389e-18	1.91644e-16	ENSG00000257452.1
ENSG00000258666.1	109.43	30.3884	29.5125	23.4613	275.315	29.871	29.2739	32.0203	-1.84841	0	0	ENSG00000258666.1
ENSG00000259583.1	3.56503	1.77339	2.5999	2.97692	5.11827	1.97748	0.97458	2.36811	-1.0074	2.12671e-67	9.30994e-66	ENSG00000259583.1
ENSG00000259834.1	0.129045	0.0262935	0.0221294	0.227453	0.137553	0.0300888	0	0.0487916	-2.2951	2.99253e-05	0.000153403	ENSG00000259834.1
ENSG00000260248.1	0.467782	0.100126	0	0.407121	0.996226	0.109198	0.0436165	0.147562	-2.22403	4.04276e-07	2.64546e-06	ENSG00000260248.1
ENSG00000260454.1	0.707604	0.112127	0.124246	1.07723	0.921335	0.210229	0.0449844	0.0811677	-2.65781	6.45365e-13	7.08849e-12	ENSG00000260454.1
ENSG00000260708.1	1.88131	0.881546	1.7821	2.677	1.18483	0.937961	0.861685	0.844992	-1.09363	0.000125187	0.00058206	ENSG00000260708.1
ENSG00000261295.1	1.89216	0.910602	1.21102	2.72612	1.73935	1.51004	0.461987	0.75978	-1.05514	1.27763e-05	6.88708e-05	ENSG00000261295.1
ENSG00000261416.1	0.921183	0.196981	0.332446	0.597724	1.83338	0.154978	0.13928	0.296685	-2.22543	2.05341e-08	1.54273e-07	ENSG00000261416.1
ENSG00000261742.1	0.303806	0.0482119	0.15672	0.386752	0.367945	0.0100277	0.0600796	0.0745284	-2.65569	7.56008e-08	5.35476e-07	ENSG00000261742.1
ENSG00000262074.3	9.29853	21.2988	7.55769	15.7592	4.57871	26.885	14.1559	22.8556	1.1957	0	0	ENSG00000262074.3
ENSG00000262202.3	12.1544	27.1899	3.9	20.3186	12.2446	31.7012	17.8507	32.0178	1.16159	0	0	ENSG00000262202.3
ENSG00000264198.1	0.142546	0.0333717	0.0377857	0.161162	0.22869	0.00685017	0.0307815	0.0624833	-2.09473	3.33245e-08	2.45724e-07	ENSG00000264198.1
ENSG00000264860.1	1.47212	0.379751	0.589534	1.1267	2.70013	0.285004	0.661683	0.192566	-1.95477	5.16764e-08	3.73549e-07	ENSG00000264860.1
ENSG00000265185.2	33.2706	6.61787	81.8223	13.7749	4.21461	6.61131	4.28401	8.95829	-2.32981	2.78497e-122	1.54911e-120	ENSG00000265185.2
ENSG00000265206.2	0.400992	0.0590375	0.0355535	0.477297	0.690126	0.0515638	0.108129	0.0174198	-2.76387	7.76834e-09	6.10294e-08	ENSG00000265206.2
ENSG00000266918.1	0.363853	0.761988	0.485284	0.350029	0.256246	1.49098	0.438329	0.356656	1.06641	0.000153489	0.000704334	ENSG00000266918.1
ENSG00000267257.1	18.8173	38.7987	21.8455	22.5636	12.0429	64.0168	25.0423	27.337	1.04395	4.44089e-16	6.23989e-15	ENSG00000267257.1
ENSG00000267269.1	0.418812	1.61363	0.497442	0.596254	0.162739	4.63789	0.0463123	0.156682	1.94593	0.000147173	0.000676889	ENSG00000267269.1
ENSG00000267272.1	0.444552	0.145209	0.0917463	0.392114	0.849796	0.0592539	0.138268	0.238106	-1.61422	8.31341e-20	1.76085e-18	ENSG00000267272.1
ENSG00000267374.1	0.18763	0.0546423	0.117681	0.232329	0.212879	0.0978869	0.0406023	0.0254378	-1.7798	4.63862e-05	0.000231568	ENSG00000267374.1
ENSG00000267488.1	0.302911	0.732846	0.27492	0.346006	0.287808	0.95693	0.877917	0.36369	1.27461	7.47875e-05	0.000361304	ENSG00000267488.1
ENSG00000267607.1	1.53078	0.282448	0.215375	0.411617	3.96534	0.383945	0.296318	0.167082	-2.43821	2.29997e-60	9.3432e-59	ENSG00000267607.1
ENSG00000267702.1	0.0334086	0.127472	0.0639653	0.0153343	0.0209263	0.213702	0.12506	0.0436529	1.93188	9.55719e-05	0.000452785	ENSG00000267702.1
ENSG00000267801.1	2.61221	1.11911	1.80753	1.48098	4.54813	1.1744	1.19775	0.985181	-1.22292	1.91365e-36	5.78677e-35	ENSG00000267801.1
ENSG00000268565.1	1.87427	0.743821	0.835174	2.47324	2.3144	0.801574	0.960508	0.46938	-1.3333	0.000109216	0.000512817	ENSG00000268565.1
ENSG00000269420.1	0.597009	0.123183	0.154418	0.22211	1.4145	0.167966	0.0718822	0.129701	-2.27695	7.02486e-07	4.4622e-06	ENSG00000269420.1
ENSG00000270346.1	0.667855	1.33693	1.50535	0.323543	0.174672	1.88748	0.657253	1.46605	1.00131	1.21037e-10	1.12252e-09	ENSG00000270346.1
ENSG00000271204.1	1.18841	2.80358	1.20484	1.75495	0.605435	6.4479	1.04903	0.913822	1.23824	4.01235e-13	4.47185e-12	ENSG00000271204.1
EPB41L3	0.809488	0.313907	0.233904	0.879521	1.31504	0.391063	0.324634	0.226025	-1.36667	3.80484e-20	8.15151e-19	erythrocyte membrane protein band 4.1-like 3
EPB41L4B	0.237433	0.48321	0.259089	0.398897	0.054313	1.1054	0.185243	0.158988	1.02513	3.3492e-07	2.2096e-06	erythrocyte membrane protein band 4.1 like 4B
EPHA5	0.0383924	0.168904	0.0196061	0.0699145	0.0256566	0.266579	0.00958308	0.23055	2.13731	1.51067e-09	1.26825e-08	EPH receptor A5
ERAP2	1.55671	3.27147	3.7467	0.372014	0.551415	4.75283	0.158813	4.90277	1.07144	0	0	endoplasmic reticulum aminopeptidase 2
ESAM	1.42368	0.697832	0.463679	1.79827	2.00909	0.280201	0.684946	1.12835	-1.02867	7.22255e-09	5.69445e-08	endothelial cell adhesion molecule
ETV7	2.29037	0.368835	0.154477	0.309632	6.407	0.233376	0.324393	0.548736	-2.63453	6.91926e-67	3.00189e-65	ets variant 7
EXOC3L4	0.502416	0.107679	0.171748	0.162901	1.1726	0.105592	0.102196	0.115249	-2.22215	1.02359e-14	1.25882e-13	exocyst complex component 3-like 4
F11R	0.627442	0.266841	0.203347	0.705888	0.973091	0.225525	0.270241	0.304757	-1.2335	4.69258e-14	5.5623e-13	F11 receptor
F13A1	0.433569	0.111066	0.244279	0.694359	0.362068	0.0108454	0.0292404	0.293111	-1.96485	2.24999e-12	2.36424e-11	coagulation factor XIII, A1 polypeptide
F3	1.00928	2.03244	0.563338	0.79003	1.67446	4.92838	0.340907	0.828043	1.00989	5.67439e-05	0.000278348	coagulation factor III (thromboplastin, tissue factor)
FABP3	1.74727	0.574702	1.24642	1.97378	2.02161	0.840204	0.251699	0.632203	-1.60422	4.26083e-13	4.73573e-12	fatty acid binding protein 3, muscle and heart (mammary-derived growth inhibitor)
FABP4	11.6438	1.83588	1.12607	25.896	7.90921	0.799916	1.09331	3.61441	-2.66501	8.43616e-97	4.39987e-95	fatty acid binding protein 4, adipocyte
FAM105A	0.132089	0.0487241	0.0300567	0.112339	0.253872	0.0594433	0.0284918	0.0582371	-1.43881	6.89875e-07	4.38899e-06	family with sequence similarity 105, member A
FAM106A	0.202075	0.531386	0.287057	0.170015	0.149152	0.679587	0.418171	0.4964	1.39487	2.35123e-06	1.39452e-05	family with sequence similarity 106, member A
FAM106CP	0.0526602	0.259106	0.0547417	0.0459309	0.0573081	0.381086	0.299674	0.0965568	2.29875	9.42555e-05	0.000446811	family with sequence similarity 106, member C pseudogene
FAM167B	1.69697	0.370759	1.59141	1.04793	2.45158	0.438239	0.170668	0.503371	-2.19441	9.35074e-16	1.2225e-14	family with sequence similarity 167, member B
FAM20A	4.94633	2.41468	2.75295	5.47236	6.61369	1.62182	2.52153	3.10069	-1.03453	4.219e-65	1.80457e-63	family with sequence similarity 20, member A
FAM225A	0.915291	0.430893	0.418222	0.777011	1.55064	0.714868	0.250926	0.326885	-1.0869	1.37005e-24	3.3094e-23	family with sequence similarity 225, member A (non-protein coding)
FAM225B	0.643629	0.285704	0.321743	0.576095	1.03305	0.342756	0.229137	0.285218	-1.17171	4.48655e-17	8.52726e-16	family with sequence similarity 225, member B (non-protein coding)
FAM26F	5.85397	0.979507	0.901661	0.642342	16.0179	1.48041	0.820448	0.637663	-2.57929	6.59582e-88	3.30499e-86	family with sequence similarity 26, member F
FAM46C	2.16941	0.636859	0.747431	3.41249	2.3483	0.501722	0.302795	1.10606	-1.76825	4.81173e-80	2.31536e-78	family with sequence similarity 46, member C
FAM65B	0.779177	0.164852	0.375138	1.03421	0.928184	0.0514351	0.176683	0.266437	-2.24078	5.38109e-40	1.72166e-38	family with sequence similarity 65, member B
FBP1	0.468667	0.132012	0.107228	0.449846	0.848928	0.198281	0.0559048	0.141851	-1.82789	2.0872e-08	1.56618e-07	fructose-1,6-bisphosphatase 1
FBXO6	4.64528	2.14566	3.03356	2.40969	8.4926	1.67691	1.86355	2.89651	-1.11435	1.15037e-27	2.96796e-26	F-box protein 6
FCER1G	8.54792	1.27864	1.69445	4.6753	19.274	1.31145	1.42283	1.10164	-2.74096	5.87991e-65	2.50614e-63	Fc fragment of IgE, high affinity I, receptor for; gamma polypeptide
FCGR1A	1.43534	0.141626	0.265507	0.86139	3.17911	0.0673872	0.10382	0.253672	-3.34123	1.38499e-47	4.92504e-46	Fc fragment of IgG, high affinity Ia, receptor (CD64)
FCGR1B	0.155245	0.024091	0.0134156	0.140704	0.311614	0	0.0131146	0.0591583	-2.68798	1.67841e-06	1.01483e-05	Fc fragment of IgG, high affinity Ib, receptor (CD64)
FCGR2A	3.93897	0.750294	0.737343	3.81178	7.26779	0.543315	0.955894	0.751674	-2.39229	5.29503e-98	2.77955e-96	Fc fragment of IgG, low affinity IIa, receptor (CD32)
FCGR2B	0.76729	0.2362	0.16041	0.69539	1.44607	0.13571	0.232312	0.340578	-1.69976	9.09015e-13	9.85392e-12	Fc fragment of IgG, low affinity IIb, receptor (CD32)
FCGR2C	0.201885	0.0642844	0.0077404	0.162364	0.435552	0.0336781	0.0454002	0.113775	-1.651	9.99803e-05	0.000471828	Fc fragment of IgG, low affinity IIc, receptor for (CD32) (gene/pseudogene)
FCGR3A	6.80983	0.606566	0.433127	3.84277	16.1536	0.532202	0.62727	0.660227	-3.48888	3.20228e-257	2.40439e-255	Fc fragment of IgG, low affinity IIIa, receptor (CD16a)
FCN3	1.76762	0.414624	0.373219	2.53651	2.39314	0.182684	0.389167	0.672022	-2.09193	6.08606e-16	8.50226e-15	ficolin (collagen/fibrinogen domain containing) 3 (Hakata antigen)
FCRL2	0.309469	0.043711	0.0595075	0.343266	0.525634	0.0242732	0.0193907	0.0874692	-2.82373	9.51333e-11	8.8977e-10	Fc receptor-like 2
FCRL5	0.481546	0.162855	0.117907	0.812421	0.514311	0.0971605	0.0605411	0.330864	-1.56408	2.35134e-15	2.99815e-14	Fc receptor-like 5
FERMT3	2.54157	0.861054	0.867823	1.80453	4.95236	1.00142	0.816381	0.76536	-1.56155	1.48451e-43	4.98646e-42	fermitin family member 3
FFAR2	0.160638	0.0212649	0	0.125931	0.355984	0.0102035	0.0122266	0.0413647	-2.91727	1.13655e-05	6.16774e-05	free fatty acid receptor 2
FGD2	0.566429	0.0944223	0.0442716	0.318394	1.33662	0.0619147	0.0865561	0.134796	-2.58469	8.45673e-22	1.90076e-20	FYVE, RhoGEF and PH domain containing 2
FGD3	0.212219	0.0676115	0.0460476	0.188888	0.40172	0.100175	0.0500158	0.0526436	-1.65021	3.51807e-07	2.3166e-06	FYVE, RhoGEF and PH domain containing 3
FGF5	0.363506	1.47941	0.864811	0.164913	0.0607934	4.33416	0.0489077	0.0551542	2.02497	0	0	fibroblast growth factor 5
FGL2	1.002	0.217587	0.20305	0.514891	2.28807	0.117795	0.173498	0.361468	-2.20322	1.86282e-43	6.24857e-42	fibrinogen-like 2
FGR	0.756677	0.270682	0.173622	0.37876	1.71765	0.619445	0.0905203	0.102082	-1.48308	7.72767e-18	1.53114e-16	Gardner-Rasheed feline sarcoma viral (v-fgr) oncogene homolog
FILIP1	1.00178	0.369592	0.191665	1.54872	1.26497	0.231142	0.225379	0.652254	-1.43857	4.11455e-24	9.80217e-23	filamin A interacting protein 1
FLG	1.47981	3.07664	3.06541	1.19411	0.17991	7.75662	1.22681	0.246497	1.05594	0	0	filaggrin
FLJ12825	0.150603	0.334309	0.146561	0.0942783	0.210969	0.286956	0.382059	0.333913	1.15044	2.58624e-05	0.00013402	uncharacterized LOC440101
FLJ40852	0.172916	0.416239	0.332037	0.114295	0.0724173	0.277822	0.432781	0.538113	1.26734	9.80128e-06	5.36449e-05	uncharacterized LOC285962
FLJ43681	0.25235	0.0173167	0	0.67327	0.0837807	0.0185708	0.0333793	0	-3.86519	1.2651e-08	9.74623e-08	ribosomal protein L23a pseudogene
FLT1	0.969394	0.471042	0.174782	0.91623	1.81717	0.0680237	0.734646	0.610456	-1.04123	2.43954e-35	7.22391e-34	fms-related tyrosine kinase 1
FLT3LG	2.57723	0.927236	1.34086	1.63132	4.7595	1.02095	0.873847	0.886911	-1.47481	1.08989e-18	2.22118e-17	fms-related tyrosine kinase 3 ligand
FLT4	0.358232	0.16395	0.0813851	0.480531	0.512781	0.0557384	0.227872	0.208239	-1.12764	1.60654e-08	1.22252e-07	fms-related tyrosine kinase 4
FMOD	17.229	7.27929	8.63584	16.8836	26.1676	5.63332	7.5825	8.62205	-1.24297	6.21991e-206	4.28538e-204	fibromodulin
FOLR2	2.73589	0.25983	0.476771	2.82881	4.90209	0.0555645	0.210842	0.513084	-3.39637	6.70523e-45	2.28072e-43	folate receptor 2 (fetal)
FOXJ1	0.148108	0.0194554	0.0145895	0.19586	0.233875	0	0.00475403	0.0536122	-2.92841	7.94274e-06	4.39688e-05	forkhead box J1
FPR2	0.420749	0.0901091	0.0943101	0.371914	0.796023	0.0718093	0.073755	0.124763	-2.22322	8.84332e-10	7.58642e-09	formyl peptide receptor 2
FPR3	3.8093	1.00967	0.803378	3.57579	7.04873	0.840575	0.872611	1.31583	-1.91564	4.84679e-78	2.30028e-76	formyl peptide receptor 3
FRAS1	1.04448	2.27343	1.0278	0.943433	1.1622	1.02175	2.89169	2.90686	1.12209	0	0	Fraser syndrome 1
FREM1	0.168521	0.0404635	0.0414356	0.176993	0.287134	0.0184382	0.0392783	0.063674	-2.05823	1.68156e-15	2.16003e-14	FRAS1 related extracellular matrix 1
FRMD4B	0.374879	0.176459	0.106156	0.568204	0.450278	0.16325	0.145522	0.220604	-1.0871	5.06607e-08	3.66425e-07	FERM domain containing 4B
FRZB	1.4035	0.506809	0.737753	0.963552	2.50919	0.340676	0.294829	0.884921	-1.46951	1.04206e-22	2.39773e-21	frizzled-related protein
FYB	0.334346	0.0814108	0.0156158	0.284976	0.702446	0.101915	0.0763266	0.0659909	-2.03805	8.0128e-17	1.50641e-15	FYN binding protein
GABBR2	0.0984655	0.811702	0.239562	0.0558344	0	2.37056	0.0498729	0.014672	3.04326	0	0	gamma-aminobutyric acid (GABA) B receptor, 2
GADD45G	2.4358	0.956674	0.470151	3.11032	3.72694	0.668756	1.39059	0.810677	-1.3483	3.38499e-13	3.79181e-12	growth arrest and DNA-damage-inducible, gamma
GAL	0.500326	0.150149	0.173274	0.145385	1.18232	0.323102	0	0.127346	-1.73647	5.11148e-05	0.000253021	galanin/GMAP prepropeptide
GATM	0.28009	0.0796201	0.0819178	0.412397	0.345956	0.0567033	0.116479	0.065678	-1.81469	4.44324e-06	2.54025e-05	glycine amidinotransferase (L-arginine:glycine amidinotransferase)
GBP1	72.2391	12.1148	9.50278	10.1825	197.032	9.43681	11.3943	15.5133	-2.57601	0	0	guanylate binding protein 1, interferon-inducible
GBP1P1	6.12928	0.120129	0.234094	0.130944	18.0228	0.0509266	0.0915362	0.217924	-5.67306	2.0438e-165	1.28743e-163	guanylate binding protein 1, interferon-inducible pseudogene 1
GBP2	39.237	9.44771	7.52514	10.6727	99.5133	4.14113	10.7902	13.4118	-2.05418	0	0	guanylate binding protein 2, interferon-inducible
GBP3	11.5311	3.61868	5.78377	5.26214	23.5474	3.54183	2.58857	4.72563	-1.672	4.49266e-244	3.29172e-242	guanylate binding protein 3
GBP4	6.28816	0.107239	0.0219377	0.307655	18.5349	0.085223	0.0959935	0.1405	-5.87374	0	0	guanylate binding protein 4
GBP5	14.7479	0.107294	0.0332774	0.315112	43.8953	0.10342	0.040276	0.178187	-7.10279	0	0	guanylate binding protein 5
GBP7	0.118258	0.00192252	0.00784765	0.0131691	0.333757	0	0	0.00576757	-5.94279	8.80995e-08	6.19122e-07	guanylate binding protein 7
GCH1	4.90413	0.585089	0.38187	1.16562	13.1649	0.580093	0.497735	0.677438	-3.06727	2.88375e-212	2.02129e-210	GTP cyclohydrolase 1
GDF10	0.32542	0.040854	0	0.10988	0.866381	0.0158276	0.0853462	0.0213882	-2.99376	2.63325e-13	2.97169e-12	growth differentiation factor 10
GDNF	1.01268	4.34328	1.41407	1.32561	0.298364	11.3231	1.16171	0.545021	2.1006	0	0	glial cell derived neurotrophic factor
GFI1	0.151984	0.0339399	0.0463254	0.188793	0.220835	0.0575885	0.0345035	0.00972757	-2.16287	1.74382e-05	9.23187e-05	growth factor independent 1 transcription repressor
GFRA2	0.0908196	0.0151505	0.0462658	0.116458	0.109735	0.0251625	0.00753792	0.012751	-2.58364	0.000220047	0.00097937	GDNF family receptor alpha 2
GIMAP1	0.337714	0.0688549	0.0261659	0.270772	0.716203	0.00948723	0.0881045	0.108973	-2.29417	5.52044e-16	7.73047e-15	GTPase, IMAP family member 1
GIMAP1-GIMAP5	2.1673	0.302412	0.110679	0.842927	5.54828	0.037043	0.388393	0.481799	-2.84131	5.87991e-65	2.50614e-63	GIMAP1-GIMAP5 readthrough
GIMAP2	2.19127	0.7412	0.534206	1.35588	4.68372	0.232431	0.548329	1.44284	-1.56383	7.06079e-21	1.55813e-19	GTPase, IMAP family member 2
GIMAP4	1.46318	0.247579	0.127407	1.18413	3.07801	0.0319814	0.300193	0.410563	-2.56315	9.7348e-33	2.75161e-31	GTPase, IMAP family member 4
GIMAP5	2.57775	0.328161	0.133381	0.886693	6.71317	0.044641	0.434625	0.505217	-2.97364	3.42344e-67	1.49058e-65	GTPase, IMAP family member 5
GIMAP6	1.40093	0.359263	0.142762	0.987187	3.07285	0.0589023	0.407446	0.611442	-1.96327	4.93912e-46	1.71364e-44	GTPase, IMAP family member 6
GIMAP7	0.898216	0.128937	0.0156698	0.525907	2.15307	0.085223	0.163393	0.138196	-2.80039	9.97378e-16	1.30045e-14	GTPase, IMAP family member 7
GIMAP8	0.707748	0.186321	0.117219	0.504056	1.50197	0.0637519	0.225994	0.269217	-1.92545	1.57762e-23	3.69666e-22	GTPase, IMAP family member 8
GLDN	1.40451	0.607486	0.121239	1.13488	2.95741	0.239027	0.138272	1.44516	-1.20914	5.87601e-34	1.70054e-32	gliomedin
GM2A	15.0968	7.49744	8.16173	13.0652	24.0635	9.22431	5.79208	7.47593	-1.00977	2.58094e-189	1.71959e-187	GM2 ganglioside activator
GNA14	0.415759	0.139931	0.28605	0.505966	0.455261	0.243872	0.0906911	0.0852285	-1.57104	2.09241e-07	1.41233e-06	guanine nucleotide binding protein (G protein), alpha 14
GNA15	0.779323	0.174766	0.0722631	0.492637	1.77307	0.196509	0.188377	0.139412	-2.1568	3.12399e-18	6.28739e-17	guanine nucleotide binding protein (G protein), alpha 15 (Gq class)
GNLY	0.853845	0.0236852	0	0.0490642	2.51247	0.0424045	0	0.028651	-5.17192	1.01903e-19	2.15275e-18	granulysin
GOLGA7B	0.108659	0.014834	0.0418135	0.225537	0.0586257	0.0259898	0.00973219	0.00878016	-2.87282	6.21068e-09	4.9271e-08	golgin A7 family, member B
GPC3	0.474798	0.197162	0.145344	0.386177	0.892874	0.131747	0.210493	0.249246	-1.26793	1.63956e-06	9.93567e-06	glypican 3
GPR133	0.48272	0.16447	0.211038	0.102041	1.13508	0.062252	0.349665	0.0814937	-1.55336	1.67482e-16	3.10533e-15	G protein-coupled receptor 133
GPR65	0.204335	0.0763956	0.0851753	0.157225	0.370606	0.0416918	0.124896	0.0625989	-1.41938	8.00095e-06	4.42708e-05	G protein-coupled receptor 65
GPR84	0.462169	0.130274	0.0510487	0.224869	1.11059	0.138819	0.0831719	0.16883	-1.82688	2.6397e-07	1.76407e-06	G protein-coupled receptor 84
GPRC5B	0.643489	0.259621	0.257226	0.840582	0.832659	0.161987	0.233808	0.383068	-1.30951	6.23314e-09	4.94168e-08	G protein-coupled receptor, family C, group 5, member B
GPRIN3	0.327349	0.088457	0.121273	0.386664	0.47411	0.135211	0.027662	0.102498	-1.88778	3.88455e-18	7.78579e-17	GPRIN family member 3
GRAP	0.730983	0.215396	0.198928	0.66764	1.32638	0.0103039	0.308673	0.327211	-1.76285	1.00493e-10	9.38087e-10	GRB2-related adaptor protein
GSTM5	0.868696	0.168872	0.895441	0.442557	1.26809	0.10674	0.327755	0.0721203	-2.36292	4.43805e-13	4.92819e-12	glutathione S-transferase mu 5
GSTT1	3.30271	0	6.72218	3.18596	0	0	0	0	#NAME?	6.91149e-60	2.79363e-58	glutathione S-transferase theta 1
GSTT2	0.920495	0.424493	1.17029	1.14077	0.450424	0.730084	0.201887	0.341508	-1.11667	0.000197012	0.000885951	glutathione S-transferase theta 2
GVINP1	0.508414	0.118161	0.0573552	0.399797	1.06809	0.127175	0.0862587	0.14105	-2.10525	7.70748e-44	2.59975e-42	GTPase, very large interferon inducible pseudogene 1
GZMA	0.480796	0.0341205	0	0.036068	1.40632	0.0233792	0	0.0789822	-3.81672	6.74798e-09	5.33242e-08	granzyme A (granzyme 1, cytotoxic T-lymphocyte-associated serine esterase 3)
GZMB	1.02147	0.0237434	0.0207971	0.226847	2.81677	0	0.0406608	0.0305694	-5.42698	1.58314e-20	3.45272e-19	granzyme B (granzyme 2, cytotoxic T-lymphocyte-associated serine esterase 1)
H19	6.52437	13.1889	3.83827	5.48184	10.253	2.27812	20.5226	16.766	1.01541	0	0	H19, imprinted maternally expressed transcript (non-protein coding)
HAVCR2	2.0493	0.397621	0.293231	1.29667	4.558	0.362061	0.335717	0.495085	-2.36567	2.45155e-55	9.37774e-54	hepatitis A virus cellular receptor 2
HBA2	1.00519	0.0837015	0.0318316	2.48387	0.499859	0.0692489	0.0414897	0.140366	-3.58607	1.89111e-09	1.57173e-08	hemoglobin, alpha 2
HBB	6.20532	0.532791	0.153819	17.1135	1.34863	0.970426	0.0400979	0.58785	-3.54186	9.72398e-53	3.63929e-51	hemoglobin, beta
HCK	1.42451	0.471354	0.455514	0.821018	2.99699	0.458778	0.626707	0.328577	-1.59558	5.28766e-23	1.2248e-21	hemopoietic cell kinase
HDC	0.182781	0.0406326	0.0291569	0.256872	0.262314	0	0.0522547	0.0696431	-2.16941	2.96133e-05	0.000152042	histidine decarboxylase
HELZ2	3.42665	1.51224	1.25485	1.91432	7.11078	1.88611	1.21554	1.43506	-1.18011	1.24018e-165	7.83254e-164	helicase with zinc finger 2, transcriptional coactivator
HERC6	3.52957	1.06914	0.302069	1.10105	9.18558	0.921079	0.506673	1.77967	-1.72304	2.542e-113	1.38848e-111	HECT and RLD domain containing E3 ubiquitin protein ligase family member 6
HIST1H2AB	47.3572	21.8141	16.6742	37.9064	87.491	36.3183	12.6559	16.468	-1.11833	5.49161e-107	2.94001e-105	histone cluster 1, H2ab
HIST1H2AG	184.128	91.7717	77.4192	152.208	322.758	135.109	60.2582	79.948	-1.00459	0	0	histone cluster 1, H2ag
HIST1H2AI	115.615	54.7616	40.8568	91.0249	214.963	97.4587	28.4998	38.3264	-1.07809	1.89731e-250	1.40285e-248	histone cluster 1, H2ai
HIST1H2AJ	69.0904	32.0648	25.2242	46.8559	135.191	57.4991	15.0951	23.6001	-1.1075	4.84294e-149	2.97344e-147	histone cluster 1, H2aj
HIST1H2AL	82.7036	39.3837	31.3866	56.5891	160.135	77.2395	18.0248	22.8867	-1.07035	1.1325e-188	7.52475e-187	histone cluster 1, H2al
HIST1H2BB	64.341	29.0835	19.3028	53.6491	120.071	49.0888	16.9477	21.214	-1.14554	1.80229e-136	1.0609e-134	histone cluster 1, H2bb
HIST1H2BJ	160.987	70.313	57.7343	107.566	317.661	109.181	43.9664	57.7915	-1.19508	0	0	histone cluster 1, H2bj
HIST1H2BO	95.0141	43.9809	37.2791	63.6651	184.098	82.0418	21.715	28.186	-1.11126	3.05445e-219	2.16598e-217	histone cluster 1, H2bo
HIST1H3C	153.344	62.8608	53.243	114.201	292.587	116.514	31.8278	40.2407	-1.28654	0	0	histone cluster 1, H3c
HIST1H3E	3.17824	8.3134	3.20969	3.95218	2.37284	15.2348	5.32451	4.38088	1.38721	1.94289e-13	2.20905e-12	histone cluster 1, H3e
HIST1H3H	157.621	77.8476	62.2937	107.063	303.507	125.377	42.4546	65.7111	-1.01774	3.35015183515009e-312	2.60409879186089e-310	histone cluster 1, H3h
HIST1H3J	37.9639	18.3632	12.8925	23.6292	77.3699	38.3021	6.03901	10.7485	-1.04781	2.10007e-92	1.07676e-90	histone cluster 1, H3j
HIST1H4F	19.9473	40.1394	19.9908	18.793	21.0581	51.0034	38.2999	31.1149	1.00883	0	0	histone cluster 1, H4f
HIST1H4I	88.6186	40.4403	24.7753	61.0965	179.984	48.6895	30.9356	41.6958	-1.13182	5.48251e-148	3.34916e-146	histone cluster 1, H4i
HIST3H2BB	3.72047	0.580776	1.06516	1.28696	8.80928	1.15862	0.333203	0.250506	-2.67943	6.73283e-24	1.59147e-22	histone cluster 3, H2bb
HK3	2.30928	0.331234	0.464505	0.926953	5.53638	0.375531	0.216813	0.401357	-2.80152	3.30244e-95	1.70406e-93	hexokinase 3 (white cell)
HLA-B	23.1248	4.61956	6.99107	0.806896	61.5763	0.128814	13.5273	0.20258	-2.32361	0	0	major histocompatibility complex, class I, B
HLA-DQA1	8.15539	0.475664	1.01161	1.45657	21.998	0	0.756945	0.670048	-4.09974	1.09453e-222	7.80722e-221	major histocompatibility complex, class II, DQ alpha 1
HLA-DQB1	1.42765	0.538914	0.0925871	2.66071	1.52964	0.0377665	0.890009	0.688968	-1.40551	8.62314e-11	8.08694e-10	major histocompatibility complex, class II, DQ beta 1
HLA-DRB1	23.6224	2.66476	1.47163	0.243404	69.1521	0.1512	0.129977	7.71309	-3.14808	0	0	major histocompatibility complex, class II, DR beta 1
HLA-DRB5	56.6095	3.71985	3.77578	0.345858	165.707	0.0717391	0	11.0878	-3.92773	0	0	major histocompatibility complex, class II, DR beta 5
HLA-H	0.0272746	0.246742	0.00702019	0.0633204	0.0114833	0.0419987	0.00686265	0.691364	3.17737	4.44089e-16	6.23989e-15	major histocompatibility complex, class I, H (pseudogene)
HMCN1	4.81152	13.5316	6.68726	4.28095	3.46634	15.7178	15.5884	9.2886	1.49177	4.44089e-16	6.23989e-15	hemicentin 1
HP	1.35379	0.243402	0.322987	3.4214	0.316997	0.161024	0.0350821	0.534099	-2.4756	4.93595e-18	9.86051e-17	haptoglobin
HPGD	0.377032	0.0511328	0.0636212	0.443064	0.624411	0.0276813	0.00414623	0.121571	-2.88237	1.32745e-15	1.71881e-14	hydroxyprostaglandin dehydrogenase 15-(NAD)
HPSE	0.754416	0.278202	0.171365	0.855852	1.23603	0.226343	0.19145	0.416812	-1.43923	7.61132e-21	1.67656e-19	heparanase
HS3ST1	0.385655	0.0860386	0.225413	0.386488	0.545065	0.0319814	0.146903	0.0792314	-2.16426	1.64805e-07	1.12587e-06	heparan sulfate (glucosamine) 3-O-sulfotransferase 1
HS3ST2	0.981249	0.235546	0.217049	1.82942	0.897277	0.321944	0.16717	0.217525	-2.05861	1.37488e-16	2.55702e-15	heparan sulfate (glucosamine) 3-O-sulfotransferase 2
HSD11B1	6.80202	1.85448	0.860836	12.0621	7.48312	1.03	1.51473	3.01872	-1.87495	3.39828e-73	1.56385e-71	hydroxysteroid (11-beta) dehydrogenase 1
HSD17B14	0.970224	0.289311	0.358073	1.04501	1.50759	0.169344	0.263797	0.434792	-1.7457	3.62817e-09	2.94479e-08	hydroxysteroid (17-beta) dehydrogenase 14
HSH2D	0.43585	0.147586	0.1223	0.513076	0.672175	0.203979	0.100958	0.137821	-1.56228	7.59282e-08	5.37481e-07	hematopoietic SH2 domain containing
HSPA7	0.537887	0.164191	0.0926986	0.434263	1.0867	0.15965	0.0604122	0.272512	-1.71193	1.24424e-11	1.24178e-10	heat shock 70kDa protein 7 (HSP70B)
IBSP	0.692157	3.45255	0.205775	1.5539	0.316797	2.30413	1.79069	6.26282	2.31849	0	0	integrin-binding sialoprotein
ICAM1	8.13248	1.35145	1.37643	2.21022	20.8108	1.38749	1.68579	0.981073	-2.58919	0	0	intercellular adhesion molecule 1
ICAM2	6.22153	2.53675	2.65542	4.58336	11.4258	2.37949	1.82944	3.40133	-1.29429	4.64431e-47	1.63712e-45	intercellular adhesion molecule 2
ICOS	0.122868	0.00528383	0.0145729	0.0489095	0.305123	0.0158515	0	0	-4.53939	3.04171e-07	2.01716e-06	inducible T-cell co-stimulator
ICOSLG	0.355106	0.103257	0.113003	0.419182	0.533133	0.161734	0.0387605	0.109277	-1.78201	3.17926e-10	2.83052e-09	inducible T-cell co-stimulator ligand
IDO1	29.1143	0.0416009	0.00997314	0.251038	87.0819	0.0108482	0.0259982	0.0879562	-9.4509	0	0	indoleamine 2,3-dioxygenase 1
IFI30	147.147	59.0885	39.188	134.294	267.958	81.7208	26.9985	68.5463	-1.3163	0	0	interferon, gamma-inducible protein 30
IFI35	30.4027	7.94992	8.51979	13.4051	69.2832	6.75357	5.77329	11.3229	-1.93519	0	0	interferon-induced protein 35
IFI6	237.805	33.0355	13.4135	21.1939	678.807	13.4456	43.6937	41.9671	-2.84769	0	0	interferon, alpha-inducible protein 6
IFIH1	3.34216	0.737084	0.508201	1.02337	8.49491	0.482963	0.658908	1.06938	-2.18088	3.58162e-123	2.00142e-121	interferon induced with helicase C domain 1
IFIT1	5.535	1.62779	1.40526	0.765546	14.4342	0.611421	0.772469	3.49949	-1.76567	9.22666e-206	6.33895e-204	interferon-induced protein with tetratricopeptide repeats 1
IFIT2	8.20168	0.83224	0.655713	0.896923	23.0524	0.353625	0.405786	1.73731	-3.30085	0	0	interferon-induced protein with tetratricopeptide repeats 2
IFIT3	36.2091	3.6159	2.49324	3.25213	102.882	2.96137	1.53615	6.35017	-3.32393	0	0	interferon-induced protein with tetratricopeptide repeats 3
IFITM1	181.876	64.751	17.1094	59.5182	468.999	9.78733	90.9177	93.5481	-1.48998	0	0	interferon induced transmembrane protein 1
IFNG	0.370891	0.00577073	0	0.0400623	1.07261	0.0173122	0	0	-6.0061	1.84903e-11	1.82585e-10	interferon, gamma
IGFBPL1	0.378357	0.909485	0.557344	0.340513	0.237213	1.03003	1.14962	0.548806	1.2653	4.88498e-14	5.78187e-13	insulin-like growth factor binding protein-like 1
IGFLR1	1.76774	0.668307	0.950025	1.54019	2.81301	0.805685	0.524692	0.674545	-1.40332	1.07907e-12	1.16258e-11	IGF-like family receptor 1
IGJ	47.3573	5.29026	12.4515	79.9782	49.6423	3.56811	2.93056	9.37212	-3.16218	0	0	immunoglobulin J polypeptide, linker protein for immunoglobulin alpha and mu polypeptides
IGLL5	74.6286	19.2842	24.5186	70.1932	129.174	12.8498	10.9966	34.0061	-1.95231	0	0	immunoglobulin lambda-like polypeptide 5
IGSF11	0.114915	0.0231851	0.00498786	0.0460356	0.293721	0.0325529	0.0260049	0.0109974	-2.3093	3.3633e-06	1.95651e-05	immunoglobulin superfamily, member 11
IGSF21	0.127977	0.00789593	0.0297193	0.166239	0.187972	0.0107756	0.0129122	0	-4.01863	6.14971e-05	0.000300146	immunoglobin superfamily, member 21
IGSF6	3.48186	0.583005	0.590287	1.45488	8.40041	0.622013	0.516932	0.61007	-2.57828	1.41606e-45	4.85747e-44	immunoglobulin superfamily, member 6
IKZF1	0.318369	0.0716046	0.0529069	0.287239	0.614962	0.0744751	0.0831571	0.0571817	-2.15258	3.64129e-20	7.81493e-19	IKAROS family zinc finger 1 (Ikaros)
IKZF3	0.195533	0.0502661	0.0461826	0.235725	0.304691	0.0209311	0.0351137	0.0947534	-1.95975	3.09571e-16	5.35883e-15	IKAROS family zinc finger 3 (Aiolos)
IL10RA	1.68745	0.506387	0.411911	1.53606	3.11438	0.431457	0.467293	0.620412	-1.73653	1.0212e-46	3.57894e-45	interleukin 10 receptor, alpha
IL12RB1	0.660306	0.0790169	0.0335274	0.236301	1.71109	0.072938	0.06555	0.0985628	-3.0629	3.90451e-29	1.03376e-27	interleukin 12 receptor, beta 1
IL15	1.13561	0.537236	0.321996	0.919728	2.1651	0.663235	0.37951	0.568964	-1.07984	9.77406e-15	1.2057e-13	interleukin 15
IL15RA	2.89104	0.34387	0.261304	0.621199	7.79061	0.3695	0.329234	0.332876	-3.07165	1.49802e-95	7.77942e-94	interleukin 15 receptor, alpha
IL1RL1	0.586644	0.0657725	0.0726511	0.389191	1.29809	0.0303944	0.0437051	0.123218	-3.15693	1.80497e-29	4.81562e-28	interleukin 1 receptor-like 1
IL1RN	0.705066	0.126736	0.0729129	0.229415	1.81287	0.277586	0.0356383	0.0669835	-2.47593	8.03181e-21	1.76438e-19	interleukin 1 receptor antagonist
IL2RA	0.374644	0.0220446	0.0119764	0.0854148	1.02654	0.00651362	0.0156102	0.04401	-4.08702	4.02057e-23	9.33079e-22	interleukin 2 receptor, alpha
IL2RB	0.153985	0.0411305	0.00952665	0.14388	0.308548	0.0362688	0.00310429	0.0840185	-1.90451	1.27977e-06	7.86739e-06	interleukin 2 receptor, beta
IL2RG	0.306375	0.0310639	0.138096	0.189604	0.591424	0.040967	0.0245449	0.0276798	-3.30199	4.45044e-08	3.23344e-07	interleukin 2 receptor, gamma
IL3	0.169473	0.00510593	0	0.0174875	0.490933	0	0	0.0153178	-5.05274	0.000207252	0.000928729	interleukin 3 (colony-stimulating factor, multiple)
IL32	15.5193	3.63489	2.24382	1.17836	43.1357	4.30194	5.52312	1.07961	-2.09408	2.52961e-190	1.6947e-188	interleukin 32
IL6	38.9432	6.89697	12.8659	18.7924	85.1712	5.73234	8.76636	6.19221	-2.49734	0	0	interleukin 6 (interferon, beta 2)
IL8	13.9183	4.96838	1.52484	9.75195	30.478	6.40106	5.75636	2.74771	-1.48613	8.86415e-156	5.48401e-154	interleukin 8
INHBE	0.562162	1.18541	0.647996	0.583482	0.455008	0.369617	2.10636	1.08025	1.07633	4.68958e-13	5.1956e-12	inhibin, beta E
INMT	2.95506	1.04072	3.83808	2.81621	2.21089	0.794036	1.69206	0.636055	-1.50561	1.10314e-30	3.00599e-29	indolethylamine N-methyltransferase
INPP5D	0.313149	0.114393	0.0956331	0.351053	0.492761	0.117027	0.13244	0.0937132	-1.45285	1.80692e-09	1.50589e-08	inositol polyphosphate-5-phosphatase, 145kDa
IQGAP2	0.586289	0.176454	0.18694	0.621803	0.950124	0.196079	0.156638	0.176644	-1.73232	3.96404e-25	9.72052e-24	IQ motif containing GTPase activating protein 2
IRF1	23.268	3.02882	2.73645	4.45108	62.6166	3.66027	2.60265	2.82355	-2.94152	0	0	interferon regulatory factor 1
IRF4	1.27936	0.288406	0.366754	1.87002	1.60132	0.203302	0.174665	0.487251	-2.14925	2.13464e-59	8.61387e-58	interferon regulatory factor 4
IRF5	0.520222	0.181905	0.294927	0.452795	0.812943	0.225245	0.126774	0.193696	-1.51594	7.88614e-11	7.42448e-10	interferon regulatory factor 5
IRF8	1.16806	0.232185	0.224352	0.916922	2.36291	0.212548	0.249975	0.234032	-2.33077	1.2029e-33	3.46471e-32	interferon regulatory factor 8
ISG15	197.121	43.3602	31.2005	36.2717	523.89	30.6354	42.3631	57.082	-2.18464	0	0	ISG15 ubiquitin-like modifier
ISG20	11.127	4.32802	3.74687	5.52701	24.1072	1.49001	4.5949	6.89915	-1.36229	4.48043e-54	1.69251e-52	interferon stimulated exonuclease gene 20kDa
ISM1	1.48127	0.732114	0.965878	2.39385	1.08408	1.51936	0.300208	0.376775	-1.01669	6.93889e-15	8.63427e-14	isthmin 1, angiogenesis inhibitor
ITGA8	1.40595	5.51649	2.26184	1.37255	0.583469	8.84549	1.39323	6.31075	1.9722	0	0	integrin, alpha 8
ITGAL	0.273061	0.043023	0.0517592	0.16751	0.599914	0.060322	0.0361412	0.0326058	-2.66604	3.6081e-19	7.45982e-18	integrin, alpha L (antigen CD11A (p180), lymphocyte function-associated antigen 1; alpha polypeptide)
ITGAM	1.06935	0.17776	0.288162	0.609561	2.31033	0.136856	0.259212	0.137211	-2.58874	2.18593e-59	8.80619e-58	integrin, alpha M (complement component 3 receptor 3 subunit)
ITGAX	1.45787	0.341691	0.451524	1.56406	2.35804	0.545211	0.199773	0.280089	-2.0931	8.59379e-64	3.61207e-62	integrin, alpha X (complement component 3 receptor 4 subunit)
ITGB7	1.30218	0.409281	0.444792	0.769729	2.69201	0.491378	0.31252	0.423944	-1.66976	5.95362e-28	1.5459e-26	integrin, beta 7
ITK	0.252683	0.0426702	0.00882186	0.125833	0.623393	0.00959588	0.0373702	0.0810445	-2.56603	1.59828e-14	1.9488e-13	IL2-inducible T-cell kinase
ITM2A	0.352565	0.0435098	0.0735043	0.475768	0.508422	0.0114219	0.0342166	0.0848908	-3.01848	6.21068e-09	4.9271e-08	integral membrane protein 2A
JSRP1	1.0063	0.299453	0.302748	1.98982	0.726323	0.0365901	0.317876	0.543894	-1.74865	1.9289e-07	1.30889e-06	junctional sarcoplasmic reticulum protein 1
KAL1	0.358187	0.145062	0.268406	0.253356	0.552798	0.199061	0.0993874	0.136739	-1.30404	2.21469e-12	2.32816e-11	Kallmann syndrome 1 sequence
KCNA3	0.432337	0.139076	0.195689	0.589162	0.512159	0.137732	0.0637659	0.215731	-1.63628	5.39758e-10	4.7172e-09	potassium voltage-gated channel, shaker-related subfamily, member 3
KCNJ5	0.422112	0.0885124	0.13286	0.607545	0.525931	0.108388	0.0692688	0.0878803	-2.25367	1.0974e-12	1.18023e-11	potassium inwardly-rectifying channel, subfamily J, member 5
KCNK17	0.153705	0.0149304	0.0224323	0.225861	0.212823	0	0.0365481	0.00824322	-3.36384	0.000178097	0.000808279	potassium channel, subfamily K, member 17
KCNK3	0.434644	0.191682	0.256581	0.771773	0.275579	0.157977	0.328121	0.0889493	-1.18112	3.24811e-06	1.89404e-05	potassium channel, subfamily K, member 3
KCNK5	0.132979	0.0245604	0.0305442	0.145226	0.223167	0.0221494	0.00663528	0.0448965	-2.43679	1.10129e-06	6.82904e-06	potassium channel, subfamily K, member 5
KCNQ5	0.162835	0.47314	0.26977	0.131429	0.0873065	1.3473	0.0529323	0.019187	1.53885	1.51218e-09	1.26897e-08	potassium voltage-gated channel, KQT-like subfamily, member 5
KCNS2	1.00537	0.39259	0.431878	1.27083	1.31339	0.721197	0.17046	0.286112	-1.35663	4.8114e-19	9.90543e-18	potassium voltage-gated channel, delayed-rectifier, subfamily S, member 2
KCTD14	0.742702	0.250949	0.207448	0.512507	1.50815	0.363547	0.135195	0.254104	-1.56539	5.27681e-10	4.61664e-09	potassium channel tetramerisation domain containing 14
KDM5D	0	1.39427	0	0	0	0	4.1828	0	Inf	0	0	lysine (K)-specific demethylase 5D
KIAA0125	0.335093	0.0466126	0.0540902	0.670679	0.280509	0.0435822	0.0417789	0.0544766	-2.84577	1.9698e-36	5.94175e-35	KIAA0125
KIAA1755	0.333484	0.131799	0.234269	0.302404	0.463778	0.176416	0.117442	0.101539	-1.33928	9.19384e-12	9.27106e-11	KIAA1755
KIF19	0.184686	0.0450085	0.015859	0.150807	0.387392	0	0.0378965	0.0971289	-2.03681	4.52366e-07	2.93729e-06	kinesin family member 19
KIF21B	0.228468	0.108166	0.0678103	0.323495	0.294099	0.0885119	0.0921727	0.143814	-1.07874	9.15344e-09	7.15402e-08	kinesin family member 21B
KLHL6	0.779113	0.216935	0.219396	0.871842	1.2461	0.218759	0.176742	0.255303	-1.84457	4.48353e-38	1.39762e-36	kelch-like family member 6
KRT34	2.71824	7.15478	5.37384	1.47153	1.30935	15.0536	5.70017	0.710573	1.39623	0	0	keratin 34
KRTAP2-3	0.377852	1.67245	0.519879	0.436203	0.177473	4.64687	0.220962	0.14951	2.14607	3.82504e-08	2.80511e-07	keratin associated protein 2-3
KYNU	6.63587	1.96321	0.525917	6.53079	12.8509	1.26893	0.467377	4.15332	-1.75707	2.22205e-100	1.17662e-98	kynureninase
L1CAM	0.358192	0.0520161	0.0808239	0.277425	0.716326	0.127877	0.0119712	0.0162002	-2.7837	1.76519e-27	4.5397e-26	L1 cell adhesion molecule
L3MBTL4	0.241578	0.0925192	0.102008	0.211722	0.411004	0.0291996	0.0944709	0.153887	-1.38466	3.09474e-05	0.000158141	l(3)mbt-like 4 (Drosophila)
LAIR1	1.40969	0.476876	0.307747	1.12467	2.79666	0.438892	0.499173	0.492562	-1.5637	9.69093e-27	2.44054e-25	leukocyte-associated immunoglobulin-like receptor 1
LAP3	57.8055	14.3346	12.6095	17.3819	143.425	13.1373	11.7498	18.1166	-2.01171	0	0	leucine aminopeptidase 3
LAPTM5	11.5738	5.5312	2.9661	8.94487	22.8105	9.71642	2.99758	3.87961	-1.0652	1.21152e-122	6.75442e-121	lysosomal protein transmembrane 5
LAT2	0.647344	0.258131	0.210952	0.626869	1.10421	0.22946	0.234859	0.310075	-1.32643	3.90875e-08	2.86131e-07	linker for activation of T cells family, member 2
LAX1	0.635139	0.199311	0.111624	0.936581	0.857211	0.15337	0.0689175	0.375645	-1.67205	1.08431e-14	1.3308e-13	lymphocyte transmembrane adaptor 1
LBP	48.1188	2.06374	1.26083	54.8313	88.2642	0.917987	1.4247	3.84853	-4.54327	0	0	lipopolysaccharide binding protein
LCK	0.215205	0.0112545	0	0.0361811	0.609434	0.028143	0.00562053	0	-4.25714	4.61672e-11	4.41676e-10	lymphocyte-specific protein tyrosine kinase
LCNL1	1.58869	0.73095	2.85306	0.67767	1.23535	0.810073	0.581048	0.80173	-1.12	9.94626e-09	7.73626e-08	lipocalin-like 1
LCP1	4.9003	1.30642	1.23984	2.80535	10.6557	1.76868	1.05637	1.0942	-1.90725	3.83838e-164	2.40539e-162	lymphocyte cytosolic protein 1 (L-plastin)
LCP2	0.545118	0.139957	0.135173	0.43365	1.06653	0.138384	0.129548	0.151938	-1.96159	7.66222e-13	8.36292e-12	lymphocyte cytosolic protein 2 (SH2 domain containing leukocyte protein of 76kDa)
LGALS17A	0.704474	0.0041751	0.0170426	0	2.09638	0	0	0.0125253	-7.39859	4.84037e-20	1.03426e-18	Charcot-Leyden crystal protein pseudogene
LGALS9	4.54331	0.938922	0.414858	1.13586	12.0792	0.629384	0.526501	1.66088	-2.27467	3.95185e-89	1.99252e-87	lectin, galactoside-binding, soluble, 9
LGI4	1.27901	0.485121	0.553471	1.18055	2.10301	0.152321	0.464999	0.838043	-1.39861	1.97687e-18	4.00192e-17	leucine-rich repeat LGI family, member 4
LILRA5	0.752226	0.165164	0.0357958	0.300343	1.92054	0.0519153	0.303268	0.140308	-2.18727	4.55386e-13	5.05216e-12	leukocyte immunoglobulin-like receptor, subfamily A (with TM domain), member 5
LILRA6	0.227422	0.0684054	0.147009	0.246694	0.288564	0.0373116	0.0670645	0.10084	-1.73319	1.58836e-06	9.65195e-06	leukocyte immunoglobulin-like receptor, subfamily A (with TM domain), member 6
LILRB1	0.256247	0.0839336	0.0444321	0.271616	0.452692	0.0759479	0.157193	0.01866	-1.61021	4.37428e-06	2.5026e-05	leukocyte immunoglobulin-like receptor, subfamily B (with TM and ITIM domains), member 1
LILRB2	0.30877	0.113933	0.0592558	0.259641	0.607414	0.0787781	0.175923	0.0870992	-1.43834	2.14692e-06	1.27803e-05	leukocyte immunoglobulin-like receptor, subfamily B (with TM and ITIM domains), member 2
LILRB3	0.285488	0.109046	0.204511	0.205913	0.446039	0.163133	0.0888541	0.0751519	-1.38849	1.38728e-05	7.45334e-05	leukocyte immunoglobulin-like receptor, subfamily B (with TM and ITIM domains), member 3
LILRB4	2.13167	0.602467	0.277095	0.914485	5.20342	0.743471	0.758456	0.305474	-1.82303	3.46377e-39	1.09237e-37	leukocyte immunoglobulin-like receptor, subfamily B (with TM and ITIM domains), member 4
LILRB5	0.7265	0.136774	0.18689	0.769791	1.22282	0.110884	0.0996521	0.199786	-2.40917	4.07942e-18	8.16287e-17	leukocyte immunoglobulin-like receptor, subfamily B (with TM and ITIM domains), member 5
LINC00669	0.176738	0.0310578	0.0896978	0.188152	0.252364	0.0682975	0.0116913	0.0131846	-2.50858	2.52999e-05	0.000131358	long intergenic non-protein coding RNA 669
LIPA	19.253	8.87477	9.32102	16.1706	32.2674	8.42012	5.23848	12.9657	-1.1173	3.74097e-196	2.51319e-194	lipase A, lysosomal acid, cholesterol esterase
LIPG	0.344609	0.118239	0.111614	0.249733	0.672479	0.0505863	0.0272774	0.276852	-1.54326	3.7458e-10	3.31665e-09	lipase, endothelial
LMO2	3.10367	0.944693	0.58986	3.65171	5.06945	0.632943	0.654545	1.54659	-1.71606	1.1909e-51	4.41615e-50	LIM domain only 2 (rhombotin-like 1)
LOC100131825	0.569567	0.14532	0.0116929	0.549408	1.1476	0.0508751	0.0800132	0.305072	-1.97063	2.8923e-17	5.55377e-16	uncharacterized LOC100131825
LOC100133445	4.36286	1.96505	1.79982	4.14449	7.14427	1.80547	1.81157	2.2781	-1.15071	1.17698e-17	2.31501e-16	uncharacterized LOC100133445
LOC100190986	4.58951	9.55224	7.68108	3.83365	2.25381	20.7411	4.23171	3.6839	1.0575	0	0	uncharacterized LOC100190986
LOC100303749	0.624995	1.56747	1.00172	0.840493	0.0327714	3.89537	0.310094	0.496941	1.32652	0.000211988	0.000948023	LSM3 homolog, U6 small nuclear RNA associated (S. cerevisiae) pseudogene
LOC100499194	0.413695	0.905236	0.415763	0.634897	0.190424	1.89037	0.428109	0.39723	1.12973	1.73434e-05	9.18569e-05	uncharacterized LOC100499194
LOC100506123	0.272154	0.085569	0.2464	0.565819	0.00424263	0	0.042258	0.214449	-1.66926	0.000129483	0.000600883	uncharacterized LOC100506123
LOC154092	0.242237	0.0156655	0.0747163	0.0470179	0.604976	0.0203179	0.00608663	0.0205921	-3.95075	4.91086e-10	4.31047e-09	uncharacterized LOC154092
LOC283867	0.347268	0.0505762	0.15319	0.459048	0.429566	0	0.0713104	0.0804183	-2.77952	2.319e-07	1.55661e-06	LOC283867
LOC285972	0.154964	0.00923713	0.00942639	0.0237276	0.431739	0	0	0.0277114	-4.06835	3.04171e-07	2.01716e-06	uncharacterized LOC285972
LOC339524	0.562927	0.181951	0.107865	0.473407	1.10751	0.0767154	0.170334	0.298805	-1.6294	3.72232e-18	7.4668e-17	uncharacterized LOC339524
LOC390660	0.000637857	0.05395	0.00191357	0	0	0.0686882	0.0523774	0.0407845	6.40225	4.55513e-11	4.35955e-10	FLJ00317 protein
LPL	5.01071	1.14493	0.53452	8.30995	6.18765	0.357795	0.633058	2.44393	-2.12976	8.97061e-152	5.5217e-150	lipoprotein lipase
LRMP	0.234053	0.0545305	0.0604124	0.281605	0.360143	0.0584114	0.0262474	0.0789327	-2.1017	2.77727e-07	1.85192e-06	lymphoid-restricted membrane protein
LRP1B	0.0361589	0.0115264	0.00582485	0.0957916	0.00686017	0.0101375	0.00303687	0.0214047	-1.64941	0.000217866	0.000970732	low density lipoprotein receptor-related protein 1B
LRRC15	0.466087	2.20652	0.732717	0.440686	0.224859	4.29536	1.44734	0.876857	2.2431	0	0	leucine rich repeat containing 15
LRRC25	1.09691	0.270245	0.216383	0.840537	2.23382	0.226651	0.407386	0.176699	-2.02111	4.71993e-24	1.12223e-22	leucine rich repeat containing 25
LRRC33	0.526753	0.164633	0.164132	0.439374	0.976752	0.195536	0.137527	0.160837	-1.67787	1.31565e-10	1.21598e-09	leucine rich repeat containing 33
LRRN1	0.266809	0.618742	0.332471	0.388852	0.079104	1.13424	0.318444	0.403543	1.21353	9.37095e-08	6.56833e-07	leucine rich repeat neuronal 1
LRRTM4	0.00793037	0.0706249	0.00399878	0.00671033	0.013082	0.0391466	0.00521206	0.167516	3.15472	6.41071e-05	0.000312382	leucine rich repeat transmembrane neuronal 4
LY6E	97.7549	43.0783	53.8769	48.4067	190.981	37.4602	41.7074	50.0672	-1.18221	0	0	lymphocyte antigen 6 complex, locus E
LY75	0.674699	0.331981	0.34459	0.715823	0.963683	0.296232	0.246304	0.453406	-1.02314	6.58415e-16	8.76564e-15	lymphocyte antigen 75
LYL1	0.781072	0.347711	0.323123	0.948904	1.07119	0.246031	0.266736	0.530365	-1.16757	1.71543e-06	1.03592e-05	lymphoblastic leukemia derived sequence 1
LYPD5	0.191387	0.043431	0.0147121	0.092581	0.466868	0.0240044	0.0143819	0.0919066	-2.1397	3.7224e-06	2.15301e-05	LY6/PLAUR domain containing 5
LYPD6B	0.538945	1.9193	0.648875	0.503347	0.464612	4.6743	0.885646	0.197953	1.83237	1.92291e-13	2.18735e-12	LY6/PLAUR domain containing 6B
MAMDC2	0.176042	0.488515	0.212915	0.2769	0.0383103	0.833744	0.444025	0.187776	1.47249	1.39147e-08	1.06589e-07	MAM domain containing 2
2017-03-04	0.63474	1.50346	1.16414	0.377636	0.362445	3.82239	0.465361	0.222641	1.24405	5.55112e-15	6.94663e-14	membrane-associated ring finger (C3HC4) 4, E3 ubiquitin protein ligase
MARCO	2.28816	0.213532	0.367321	1.81398	4.68317	0.102741	0.49929	0.0385657	-3.42166	8.2244e-62	3.39792e-60	macrophage receptor with collagenous structure
MATK	0.383124	0.103362	0.105689	0.253367	0.790317	0.114962	0.122997	0.0721274	-1.8901	1.57113e-09	1.31617e-08	megakaryocyte-associated tyrosine kinase
MBP	0.491895	0.155778	0.209327	0.484754	0.781603	0.173047	0.169161	0.125126	-1.65886	1.69724e-23	3.96929e-22	myelin basic protein
MCTP2	0.164577	0.0620183	0.0626863	0.334365	0.0966799	0.0779272	0.0423121	0.0658155	-1.408	1.11773e-07	7.7671e-07	multiple C2 domains, transmembrane 2
MEFV	0.329803	0.0466744	0.0471756	0.167126	0.775106	0.0570163	0.0136643	0.0693427	-2.8209	1.59692e-17	3.11572e-16	Mediterranean fever
MEGF10	0.281885	0.140642	0.102743	0.47729	0.265621	0.0872257	0.119219	0.215481	-1.00308	9.80599e-07	6.12294e-06	multiple EGF-like-domains 10
MEI1	0.216427	0.0741661	0.0673025	0.314618	0.267362	0.0679784	0.0626592	0.0918607	-1.54505	5.11046e-06	2.90187e-05	meiosis inhibitor 1
MERTK	0.496394	0.133491	0.164645	0.744199	0.580337	0.0751024	0.141913	0.183458	-1.89474	1.57658e-13	1.80185e-12	c-mer proto-oncogene tyrosine kinase
MFNG	0.518257	0.163495	0.162288	0.537103	0.855379	0.0490351	0.123391	0.318059	-1.66442	5.26095e-08	3.79615e-07	MFNG O-fucosylpeptide 3-beta-N-acetylglucosaminyltransferase
MGAT3	0.421474	0.186547	0.218128	0.434284	0.612009	0.140751	0.187934	0.230957	-1.1759	1.80325e-09	1.50335e-08	mannosyl (beta-1,4-)-glycoprotein beta-1,4-N-acetylglucosaminyltransferase
MGAT4A	0.363063	0.167614	0.1357	0.459231	0.494258	0.0984043	0.165082	0.239357	-1.11507	2.26259e-11	2.22696e-10	mannosyl (alpha-1,3-)-glycoprotein beta-1,4-N-acetylglucosaminyltransferase, isozyme A
MGAT5B	0.168605	0.0563724	0.0519554	0.388704	0.065156	0.0518044	0.0282164	0.0890965	-1.58059	5.09867e-05	0.000252456	mannosyl (alpha-1,6-)-glycoprotein beta-1,6-N-acetyl-glucosaminyltransferase, isozyme B
MGP	7.92338	1.65895	2.85015	12.7249	8.1951	0.511963	1.30363	3.16126	-2.25585	5.9751e-96	3.10961e-94	matrix Gla protein
MILR1	1.9058	0.657581	0.9156	1.94619	2.85561	0.929538	0.437582	0.605622	-1.53516	1.24078e-08	9.57412e-08	mast cell immunoglobulin-like receptor 1
MIR1291	11.6099	23.6396	22.7998	4.64324	7.38657	7.94572	24.0914	38.8818	1.02586	3.88238e-09	3.14481e-08	microRNA 1291
MIR4420	7.74712	2.54813	2.75116	4.61671	15.8735	3.80869	1.62995	2.20576	-1.60422	1.38092e-05	7.42078e-05	microRNA 4420
MLC1	0.317958	0.123755	0.21685	0.166463	0.57056	0.0451678	0.0751715	0.250927	-1.36134	1.76282e-07	1.20124e-06	megalencephalic leukoencephalopathy with subcortical cysts 1
MLKL	3.23584	1.40332	1.10068	2.63682	5.97002	1.9734	0.747003	1.48956	-1.2053	8.4219e-42	2.77511e-40	mixed lineage kinase domain-like
MMP12	0.472524	0.0735519	0.195045	0.335917	0.88661	0.0781635	0.0066901	0.135802	-2.68355	1.1834e-11	1.18447e-10	matrix metallopeptidase 12 (macrophage elastase)
MMP13	6.35217	1.26135	1.18991	15.6236	2.24299	1.0863	0.64161	2.05615	-2.33228	3.05725e-142	1.84899e-140	matrix metallopeptidase 13 (collagenase 3)
MMP25	0.42279	0.171512	0.211509	0.22297	0.83389	0.20057	0.194392	0.119574	-1.30163	5.79334e-09	4.61564e-08	matrix metallopeptidase 25
MMP7	1.25937	0.38599	0.240942	0.722005	2.81515	0.561603	0.381342	0.215024	-1.70606	1.06329e-12	1.14711e-11	matrix metallopeptidase 7 (matrilysin, uterine)
MNDA	0.788689	0.125587	0.0462103	0.271408	2.04845	0.0251323	0.105404	0.246224	-2.65077	1.47373e-17	2.88233e-16	myeloid cell nuclear differentiation antigen
MOB3B	0.131835	0.0542163	0.0826402	0.0965794	0.216286	0.016052	0.0750153	0.0715815	-1.28194	0.000141075	0.000650692	MOB kinase activator 3B
MOXD1	1.37069	0.618035	0.975897	1.66423	1.47194	0.66862	0.454284	0.7312	-1.14914	9.41473e-16	1.22954e-14	monooxygenase, DBH-like 1
MPEG1	2.65926	0.927754	0.734131	3.26966	3.974	0.510696	1.41306	0.859506	-1.51921	5.92963e-63	2.47514e-61	macrophage expressed 1
MPZ	1.0488	0.50411	0.522087	1.00009	1.62422	0.45003	0.468643	0.593656	-1.05693	3.90773e-08	2.86131e-07	myelin protein zero
MRC1	1.42806	0.413614	0.263403	1.07391	2.94686	0.242125	0.548833	0.449884	-1.7877	4.10247e-55	1.56436e-53	mannose receptor, C type 1
MS4A2	0.134354	0.0283238	0.0211164	0.181606	0.200339	0.0229691	0.0309637	0.0310386	-2.24595	1.05396e-05	5.73881e-05	membrane-spanning 4-domains, subfamily A, member 2
MS4A4A	1.49353	0.460345	0.311134	1.65636	2.5131	0.210062	0.5244	0.646572	-1.69794	1.72294e-18	3.49956e-17	membrane-spanning 4-domains, subfamily A, member 4A
MS4A6A	0.974106	0.24301	0.219617	0.7752	1.9275	0.00823744	0.370152	0.35064	-2.00306	7.17916e-21	1.58281e-19	membrane-spanning 4-domains, subfamily A, member 6A
MS4A7	2.03955	0.902767	0.505782	2.68055	2.93232	0.891396	1.02641	0.790495	-1.17583	2.98542e-25	7.34305e-24	membrane-spanning 4-domains, subfamily A, member 7
MSR1	4.05604	0.951609	1.00325	3.86155	7.30331	0.995879	0.644677	1.21427	-2.09163	2.08377e-201	1.41556e-199	macrophage scavenger receptor 1
MTUS1	0.303515	0.0843443	0.137467	0.371656	0.401421	0.0692261	0.0696797	0.114127	-1.8474	4.43673e-17	8.43918e-16	microtubule associated tumor suppressor 1
MX1	18.2903	3.56556	1.54386	2.86863	50.4584	0.418375	1.35428	8.92404	-2.35888	0	0	myxovirus (influenza virus) resistance 1, interferon-inducible protein p78 (mouse)
MX2	9.70363	4.28534	2.20483	5.50076	21.4053	1.45736	3.98009	7.41858	-1.17911	3.56254e-120	1.96361e-118	myxovirus (influenza virus) resistance 2 (mouse)
MYBPH	0.231194	0.0475462	0.149288	0.348937	0.195358	0.069594	0.0416965	0.031348	-2.28171	4.92664e-05	0.000244838	myosin binding protein H
MYO1F	1.077	0.420987	0.387655	1.06484	1.77852	0.451786	0.393993	0.417181	-1.35518	4.79286e-24	1.13734e-22	myosin IF
MYO1G	0.530636	0.0880304	0.146829	0.349879	1.0952	0.0830502	0.103345	0.077696	-2.59165	1.21498e-21	2.71825e-20	myosin IG
MYO7A	0.119796	0.0275187	0.0348068	0.114732	0.209848	0.016226	0.0243041	0.042026	-2.12209	2.70587e-09	2.21766e-08	myosin VIIA
MYOCD	0.33643	0.127523	0.613826	0.257515	0.13795	0.194499	0.093921	0.0941482	-1.39955	2.76865e-10	2.47678e-09	myocardin
MYZAP	0.302531	0.107489	0.0562164	0.525589	0.325787	0.0524132	0.0575717	0.212481	-1.4929	8.61288e-05	0.000412073	myocardial zonula adherens protein
MZB1	13.6744	2.23857	2.84098	20.203	17.9791	1.29182	1.35067	4.07323	-2.61082	2.0662e-119	1.13627e-117	marginal zone B and B1 cell-specific protein
NAMPT	11.0698	5.3238	4.09881	11.6083	17.5022	4.62763	3.83286	7.5109	-1.0561	1.8475e-173	1.18533e-171	nicotinamide phosphoribosyltransferase
NCF1B	0.328861	0.0513505	0.101626	0.319759	0.565199	0.110543	0.0248363	0.0186723	-2.67903	1.23656e-07	8.55604e-07	neutrophil cytosolic factor 1B pseudogene
NCF2	3.56845	1.0197	0.826231	1.82058	8.05853	1.25149	1.13227	0.675333	-1.80715	2.27966e-74	1.06525e-72	neutrophil cytosolic factor 2
NCF4	1.33667	0.386424	0.293033	1.4162	2.30078	0.331493	0.46597	0.361809	-1.79039	4.43673e-17	8.43918e-16	neutrophil cytosolic factor 4, 40kDa
NCKAP1L	1.68092	0.345575	0.341716	1.46225	3.23879	0.377007	0.34041	0.319308	-2.28218	3.56857e-68	1.57929e-66	NCK-associated protein 1-like
NCRNA00185	0	0.139918	0	0	0	0	0.419754	0	Inf	9.5448e-06	5.23238e-05	non-protein coding RNA 185
NDP	0.581592	0.176058	0.211628	0.645693	0.887456	0.0627806	0.175533	0.289859	-1.72396	1.3984e-08	1.07052e-07	Norrie disease (pseudoglioma)
NES	4.38229	1.90242	3.48635	3.98946	5.67107	1.5757	1.49289	2.63868	-1.20385	2.18992e-88	1.09958e-86	nestin
NFAM1	0.3343	0.082916	0.0927854	0.446924	0.463192	0.127092	0.0559896	0.0656663	-2.01142	1.78475e-17	3.46547e-16	NFAT activating protein with ITAM motif 1
NIM1	0.179875	0.464969	0.0999658	0.231893	0.207766	0.55008	0.525019	0.319807	1.37014	5.02515e-07	3.249e-06	serine/threonine-protein kinase NIM1
NKG7	0.375191	0.0283305	0.0932597	0.25431	0.778004	0.0507211	0	0.0342703	-3.7272	1.15853e-06	7.16387e-06	natural killer cell group 7 sequence
NLGN4Y	0	0.564438	0	0	0	0.00330199	1.68555	0.00446205	Inf	0	0	neuroligin 4, Y-linked
NMUR1	0.138221	0.0181192	0.0647035	0.103643	0.246316	0.00639823	0.0306674	0.0172921	-2.93138	7.49701e-07	4.74402e-06	neuromedin U receptor 1
NOD2	0.257065	0.0778094	0.0901718	0.183742	0.497282	0.0467064	0.0699589	0.116763	-1.72412	2.54446e-09	2.09109e-08	nucleotide-binding oligomerization domain containing 2
NPL	1.88042	0.847148	0.82726	1.98026	2.83374	0.846911	0.733376	0.961158	-1.15037	2.96192e-24	7.09106e-23	N-acetylneuraminate pyruvate lyase (dihydrodipicolinate synthase)
NR1H3	2.67284	1.334	1.17296	2.46391	4.38164	1.27587	1.39331	1.33282	-1.00261	4.02378e-21	8.91185e-20	nuclear receptor subfamily 1, group H, member 3
NR4A2	1.23307	0.470946	0.812648	2.10504	0.781516	0.314425	0.689556	0.408856	-1.38862	3.37542e-17	6.46099e-16	nuclear receptor subfamily 4, group A, member 2
NR4A3	1.64006	0.688105	0.979537	2.76264	1.178	0.268859	0.902866	0.892591	-1.25305	4.53064e-32	1.26586e-30	nuclear receptor subfamily 4, group A, member 3
NTNG1	0.0582695	0.22616	0.0553872	0.0650615	0.0543598	0.530172	0.0180481	0.13026	1.95653	0.000107332	0.000504655	netrin G1
NUGGC	0.264934	0.0536409	0.049545	0.307622	0.437634	0.0646704	0.0161444	0.0801079	-2.30423	7.3385e-12	7.44658e-11	nuclear GTPase, germinal center associated
NUP210	0.221056	0.0834727	0.0856988	0.298857	0.278612	0.113609	0.0383972	0.098412	-1.40503	7.85355e-10	6.77568e-09	nucleoporin 210kDa
OAS1	6.91866	0.556493	0.12587	0.991118	19.639	0.273828	0.271331	1.12432	-3.63606	3.41426e-233	2.46436e-231	2'-5'-oligoadenylate synthetase 1, 40/46kDa
OAS2	4.67551	1.15418	0.471385	1.32013	12.235	1.0153	0.850408	1.59684	-2.01825	8.42944e-279	6.42864e-277	2'-5'-oligoadenylate synthetase 2, 69/71kDa
OAS3	3.04254	0.969219	0.374875	0.719292	8.03344	1.87446	0.405287	0.627911	-1.65038	3.40269e-179	2.22431e-177	2'-5'-oligoadenylate synthetase 3, 100kDa
OASL	5.12266	0.762504	0.175494	1.28648	13.906	0.432017	0.300974	1.55452	-2.74808	3.04525e-143	1.84633e-141	2'-5'-oligoadenylate synthetase-like
ODF3B	4.99436	1.49244	0.833857	1.78243	12.3668	0.604679	2.23841	1.63423	-1.74263	4.41718e-37	1.36119e-35	outer dense fiber of sperm tails 3B
OGN	0.0791254	0.256408	0.0627914	0.121175	0.0534098	0.471274	0.196423	0.101526	1.69623	8.67512e-05	0.000414641	osteoglycin
OLFM1	0.499488	0.246878	0.252763	0.328219	0.917482	0.340402	0.121584	0.278649	-1.01665	1.63661e-07	1.119e-06	olfactomedin 1
OPCML	0.046452	0.276146	0.0765029	0.0493766	0.0134766	0.71693	0.0920444	0.0194626	2.57162	2.08722e-13	2.36539e-12	opioid binding protein/cell adhesion molecule-like
OSCAR	0.445802	0.128774	0.318316	0.342199	0.676892	0.0432806	0.23338	0.109661	-1.79156	1.14792e-06	7.10006e-06	osteoclast associated, immunoglobulin-like receptor
OSM	0.561763	0.0564395	0.0207859	0.209284	1.45522	0.0226096	0.047412	0.0992968	-3.31519	1.75727e-17	3.41485e-16	oncostatin M
OVOL1	0.100962	0.00936707	0.0382359	0.160408	0.104241	0	0	0.0281012	-3.43007	5.18489e-05	0.000256411	ovo-like 1(Drosophila)
P2RX7	0.596613	0.196296	0.180027	0.286202	1.32361	0.257661	0.132762	0.198464	-1.60377	3.87193e-19	7.99846e-18	purinergic receptor P2X, ligand-gated ion channel, 7
P2RY10	0.164751	0.00994573	0	0.198596	0.295657	0	0.0140231	0.0158141	-4.05007	4.38648e-06	2.50898e-05	purinergic receptor P2Y, G-protein coupled, 10
P2RY13	0.149122	0.0162663	0.0556392	0.105039	0.286688	0	0.0181302	0.0306687	-3.19654	5.36752e-07	3.45654e-06	purinergic receptor P2Y, G-protein coupled, 13
P2RY6	0.382255	0.183148	0.187207	0.445891	0.513666	0.302163	0.114132	0.133148	-1.06153	4.31982e-06	2.47319e-05	pyrimidinergic receptor P2Y, G-protein coupled, 6
PARM1	0.847927	0.384517	0.40391	1.09023	1.04964	0.344018	0.305447	0.504086	-1.14089	3.12043e-16	5.39776e-15	prostate androgen-regulated mucin-like protein 1
PARP12	4.3136	1.86602	1.37667	1.96493	9.5992	1.8732	1.67518	2.04968	-1.20893	3.37275e-80	1.62616e-78	poly (ADP-ribose) polymerase family, member 12
PARP14	14.9494	5.54909	4.25737	6.53425	34.0566	4.51405	4.94991	7.18331	-1.42977	0	0	poly (ADP-ribose) polymerase family, member 14
PART1	0.0270975	0.092356	0.0223012	0.0510321	0.00795912	0.211705	0.0132126	0.0521504	1.76905	0.000116157	0.00054247	prostate androgen-regulated transcript 1 (non-protein coding)
PCDH10	0.207134	0.636964	0.187836	0.284792	0.148775	0.957061	0.609921	0.343911	1.62065	0	0	protocadherin 10
PCDH15	0.0235125	0.00274582	0.013907	0.0505641	0.00606625	0.0016808	0.00201406	0.0045426	-3.09812	0.000178097	0.000808279	protocadherin-related 15
PCDH17	0.38277	0.1826	0.0529003	0.451929	0.643482	0.078466	0.227225	0.242108	-1.0678	3.28238e-11	3.17908e-10	protocadherin 17
PCDH7	0.348165	0.13966	0.414695	0.412986	0.216815	0.215001	0.0644076	0.139571	-1.31786	5.77194e-15	7.21333e-14	protocadherin 7
PCDHA1	0.278855	0.114086	0.333014	0.297249	0.206301	0.0963383	0.113131	0.132788	-1.28939	3.46383e-06	2.01113e-05	protocadherin alpha 1
PCDHA10	0.340732	0.138935	0.388657	0.397904	0.235634	0.10472	0.141749	0.170336	-1.29423	3.24253e-07	2.14214e-06	protocadherin alpha 10
PCDHA11	0.274155	0.105569	0.356574	0.275563	0.190329	0.0850569	0.112114	0.119537	-1.3768	2.83422e-07	1.88627e-06	protocadherin alpha 11
PCDHA12	0.285422	0.130651	0.347736	0.306807	0.201722	0.120883	0.126161	0.144909	-1.12738	2.67571e-05	0.00013842	protocadherin alpha 12
PCDHA13	0.302571	0.117073	0.36748	0.323597	0.216636	0.110814	0.106703	0.133701	-1.36987	3.36592e-07	2.22002e-06	protocadherin alpha 13
PCDHA2	0.288845	0.120224	0.351105	0.306378	0.209053	0.0954777	0.12585	0.139343	-1.26458	3.92561e-06	2.26406e-05	protocadherin alpha 2
PCDHA3	0.363803	0.161208	0.436292	0.414475	0.240641	0.121584	0.17389	0.18815	-1.17423	1.96937e-06	1.17987e-05	protocadherin alpha 3
PCDHA4	0.343177	0.170837	0.42006	0.367512	0.241958	0.164021	0.163785	0.184704	-1.00633	2.79666e-05	0.000144124	protocadherin alpha 4
PCDHA5	0.287097	0.113291	0.369443	0.285668	0.206179	0.0984945	0.110942	0.130436	-1.34151	1.20873e-06	7.45525e-06	protocadherin alpha 5
PCDHA6	0.375537	0.142445	0.490075	0.399012	0.237523	0.118461	0.13012	0.178754	-1.39855	1.88286e-08	1.4212e-07	protocadherin alpha 6
PCDHA7	0.36741	0.147469	0.393548	0.475249	0.233434	0.11202	0.122246	0.208141	-1.31698	9.45554e-08	6.6239e-07	protocadherin alpha 7
PCDHA8	0.288461	0.112732	0.340852	0.313373	0.211157	0.0986058	0.106341	0.133248	-1.35548	8.39975e-07	5.27748e-06	protocadherin alpha 8
PCDHA9	0.17937	0.0746027	0.220592	0.199056	0.118463	0.0701731	0.0664557	0.0871792	-1.26564	1.64087e-06	9.94117e-06	protocadherin alpha 9
PCDHAC1	0.297699	0.139796	0.356033	0.32317	0.213893	0.130264	0.120233	0.168892	-1.09053	7.91753e-06	4.38804e-05	protocadherin alpha subfamily C, 1
PCDHAC2	0.472313	0.175829	0.597297	0.406204	0.413438	0.174394	0.165949	0.187144	-1.42557	3.38499e-13	3.79181e-12	protocadherin alpha subfamily C, 2
PCSK1	0.582901	0.286907	0.304763	1.05937	0.38457	0.351235	0.165513	0.343974	-1.02267	5.23409e-10	4.58423e-09	proprotein convertase subtilisin/kexin type 1
PDCD1	0.222949	0.0223095	0	0.0841587	0.584687	0.0297554	0.0237701	0.013403	-3.32098	1.2651e-08	9.74623e-08	programmed cell death 1
PDE1B	0.631174	0.248022	0.332129	0.898942	0.662452	0.233077	0.160592	0.350396	-1.34757	2.93032e-11	2.84949e-10	phosphodiesterase 1B, calmodulin-dependent
PDE2A	0.47506	0.224286	0.155837	0.670976	0.598368	0.17397	0.176393	0.322495	-1.08277	1.53628e-08	1.172e-07	phosphodiesterase 2A, cGMP-stimulated
PDE3B	0.257747	0.0869894	0.0790563	0.390032	0.304153	0.0963118	0.0391563	0.1255	-1.56705	2.13643e-10	1.93548e-09	phosphodiesterase 3B, cGMP-inhibited
PDGFB	0.707979	0.340566	0.134672	0.663854	1.32541	0.189214	0.424206	0.408277	-1.05577	1.42211e-09	1.19671e-08	platelet-derived growth factor beta polypeptide
PDK4	1.59676	0.752767	0.317499	3.79506	0.677709	1.12099	0.55969	0.577621	-1.08487	5.52412e-20	1.17622e-18	pyruvate dehydrogenase kinase, isozyme 4
PDZD4	1.68097	0.835834	0.766211	1.00964	3.26707	0.469857	1.1495	0.888144	-1.00801	1.74853e-20	3.81001e-19	PDZ domain containing 4
PECAM1	2.53208	1.13545	0.61844	3.01906	3.95874	0.376336	1.21194	1.81807	-1.15706	5.32623e-40	1.70636e-38	platelet/endothelial cell adhesion molecule 1
PF4	0.473814	0.0626122	0.0449956	1.17036	0.206085	0.171302	0	0.0165346	-2.9198	6.21044e-06	3.49319e-05	platelet factor 4
PHACTR1	0.259916	0.111905	0.0802143	0.336518	0.363017	0.14542	0.0871269	0.103168	-1.21577	9.19552e-05	0.000436931	phosphatase and actin regulator 1
PIGR	0.204325	0.0424961	0.00450482	0.31372	0.294751	0.00980014	0.0117433	0.105945	-2.26546	4.49165e-09	3.61178e-08	polymeric immunoglobulin receptor
PIK3AP1	1.62366	0.444485	0.296217	1.1856	3.38915	0.505081	0.51653	0.311844	-1.86904	8.48166e-66	3.64712e-64	phosphoinositide-3-kinase adaptor protein 1
PIK3CG	0.326032	0.0897586	0.103827	0.321427	0.552843	0.0700986	0.0886641	0.110513	-1.86089	2.58996e-14	3.12031e-13	phosphatidylinositol-4,5-bisphosphate 3-kinase, catalytic subunit gamma
PIK3R5	0.422031	0.170675	0.154499	0.444954	0.666641	0.204391	0.114295	0.193339	-1.3061	4.87848e-11	4.65799e-10	phosphoinositide-3-kinase, regulatory subunit 5
PILRA	2.17237	0.6681	0.395113	1.75582	4.36617	0.907314	0.505459	0.591527	-1.70113	2.27556e-23	5.30643e-22	paired immunoglobin-like type 2 receptor alpha
PIM2	5.14247	1.60288	1.55861	6.98945	6.87935	1.61874	0.86655	2.32334	-1.6818	1.45378e-73	6.71562e-72	pim-2 oncogene
PKDCC	0.315678	0.876771	0.308007	0.31658	0.322447	1.87617	0.431569	0.322573	1.47375	1.18104e-07	8.18124e-07	protein kinase domain containing, cytoplasmic
PKNOX2	0.458249	0.149889	0.423369	0.485188	0.466189	0.162865	0.131226	0.155576	-1.61224	1.07256e-10	9.99302e-10	PBX/knotted 1 homeobox 2
PKP1	0.0611113	0.241307	0.102531	0.0622963	0.0185065	0.634549	0.0529952	0.0363779	1.98136	2.28656e-07	1.53696e-06	plakophilin 1 (ectodermal dysplasia/skin fragility syndrome)
PLA1A	0.402467	0.04718	0.0324575	0.0635446	1.1114	0.0117684	0.0423055	0.0874662	-3.09262	8.59103e-12	8.68124e-11	phospholipase A1 member A
PLA2G2D	0.111662	0.0118787	0.0391028	0.0656182	0.230265	0.0212668	0	0.0143692	-3.23269	0.000118318	0.000551925	phospholipase A2, group IID
PLA2G4C	1.42939	0.303069	0.675197	0.736479	2.87649	0.293775	0.361802	0.253629	-2.23768	1.05012e-36	3.20347e-35	phospholipase A2, group IVC (cytosolic, calcium-independent)
PLA2G5	1.48219	0.583323	0.111848	1.13468	3.20005	0.741026	0.642773	0.366171	-1.34537	1.03997e-17	2.04885e-16	phospholipase A2, group V
PLA2G7	2.8244	1.05635	0.485581	2.33862	5.64899	1.56343	0.78481	0.82081	-1.41885	1.20451e-36	3.66982e-35	phospholipase A2, group VII (platelet-activating factor acetylhydrolase, plasma)
PLAC8	0.2964	0.0744803	0.0563928	0.346985	0.485822	0.102234	0.024501	0.096706	-1.99261	7.7988e-07	4.9203e-06	placenta-specific 8
PLCB2	0.430452	0.144577	0.189411	0.428405	0.673541	0.206029	0.112706	0.114996	-1.57402	2.95653e-14	3.55135e-13	phospholipase C, beta 2
PLCB4	3.47115	7.97606	6.14027	3.11289	1.16029	13.5135	5.51669	4.89798	1.20026	2.22045e-16	3.87412e-15	phospholipase C, beta 4
PLCG2	0.662065	0.229017	0.175812	1.05529	0.755093	0.254983	0.196838	0.235231	-1.53152	4.68135e-17	8.8697e-16	phospholipase C, gamma 2 (phosphatidylinositol-specific)
PLEK	3.02242	0.483747	0.492932	1.47874	7.09558	0.499457	0.435664	0.516121	-2.64338	4.35456e-108	2.34681e-106	pleckstrin
PLEKHA6	0.102192	0.0238166	0.124682	0.169997	0.011897	0.0169526	0.00677132	0.047726	-2.10124	8.57648e-06	4.7315e-05	pleckstrin homology domain containing, family A member 6
PLIN1	0.95776	0.0863256	0.0714708	2.45321	0.3486	0.0706741	0.0211718	0.167131	-3.4718	5.71485e-37	1.75439e-35	perilipin 1
PLIN4	0.936588	0.464689	0.357699	2.16447	0.287595	0.445137	0.262747	0.686182	-1.01115	2.86066e-15	3.63039e-14	perilipin 4
PLP1	0.530258	0.261236	0.334977	0.454809	0.800988	0.0397492	0.238152	0.505806	-1.02134	1.40063e-05	7.51605e-05	proteolipid protein 1
PLVAP	8.72659	4.0169	1.93766	8.34192	15.9002	0.994008	4.86916	6.18754	-1.11934	2.97447e-68	1.32119e-66	plasmalemma vesicle associated protein
PMAIP1	1.60372	0.391815	0.328263	0.584243	3.89864	0.357065	0.175035	0.643346	-2.03317	2.52889e-31	6.96939e-30	phorbol-12-myristate-13-acetate-induced protein 1
PNMAL1	1.72941	0.378051	2.30827	0.336635	2.54331	0.323059	0.48559	0.325503	-2.19362	3.35335e-52	1.24924e-50	paraneoplastic Ma antigen family-like 1
PNPLA3	0.676376	1.43371	1.02985	0.702793	0.296485	3.14404	0.738273	0.418806	1.08385	5.95407e-09	4.73592e-08	patatin-like phospholipase domain containing 3
PODN	4.37415	1.99636	5.9854	3.05484	4.0822	1.23835	2.20747	2.54326	-1.13163	1.41965e-38	4.44249e-37	podocan
POU2AF1	0.917553	0.27736	0.254149	1.35942	1.13909	0.283359	0.0910967	0.457623	-1.72603	6.92195e-20	1.46843e-18	POU class 2 associating factor 1
PPAPDC1A	1.02238	2.24418	0.911627	1.21109	0.944425	4.71016	1.28724	0.735132	1.13425	1.92663e-07	1.30771e-06	phosphatidic acid phosphatase type 2 domain containing 1A
PPBP	0.237197	0.0189636	0.0294692	0.383254	0.298867	0.0160274	0.0192053	0.0216582	-3.64478	2.78205e-05	0.000143462	pro-platelet basic protein (chemokine (C-X-C motif) ligand 7)
PPP1R16B	0.471989	0.072421	0.0831818	0.633311	0.699474	0.0201067	0.0341323	0.163024	-2.70427	1.62171e-33	4.65993e-32	protein phosphatase 1, regulatory subunit 16B
PRCD	4.14055	2.03555	1.60628	4.14412	6.67124	1.47625	1.657	2.9734	-1.0244	7.44353e-31	2.03518e-29	progressive rod-cone degeneration
PRDM1	0.788296	0.381529	0.18195	1.26322	0.919719	0.582099	0.153453	0.409034	-1.04695	2.38891e-17	4.60173e-16	PR domain containing 1, with ZNF domain
PRF1	0.162146	0.0204058	0	0.0637667	0.422672	0.0165334	0	0.0446839	-2.99025	1.55271e-07	1.06434e-06	perforin 1 (pore forming protein)
PRG2	1.33321	0.458552	0.224716	1.45181	2.3231	0.317761	0.380766	0.677128	-1.53975	4.0415e-08	2.95224e-07	proteoglycan 2, bone marrow (natural killer cell activator, eosinophil granule major basic protein)
PRKCB	0.195703	0.0542916	0.0504643	0.159286	0.377358	0.052278	0.0328879	0.0777089	-1.84986	5.48568e-14	6.46761e-13	protein kinase C, beta
PRKY	0.00149263	0.610403	0	0.00447789	0	0	1.83121	0	8.67576	0	0	protein kinase, Y-linked, pseudogene
PRRT2	0.395437	0.191283	0.414941	0.348155	0.423214	0.358423	0.139186	0.0762394	-1.04774	8.93065e-06	4.91571e-05	proline-rich transmembrane protein 2
PRTG	0.240778	0.532671	0.262201	0.330674	0.129458	0.265959	0.891082	0.440971	1.14554	0	0	protogenin
PSMB10	38.7312	14.3912	11.486	21.8766	82.8309	13.639	12.2013	17.3333	-1.42831	1.58159e-228	1.13818e-226	proteasome (prosome, macropain) subunit, beta type, 10
PSME1	61.4697	30.4884	25.7104	41.0177	117.681	26.1758	29.4457	35.8437	-1.01162	1.45123e-242	1.05691e-240	proteasome (prosome, macropain) activator subunit 1 (PA28 alpha)
PSME2	74.2909	35.3635	30.5482	41.4975	150.827	41.0112	26.4941	38.5853	-1.07092	3.85826e-251	2.86149e-249	proteasome (prosome, macropain) activator subunit 2 (PA28 beta)
PSTPIP1	0.460747	0.142108	0.30107	0.313588	0.767584	0.112926	0.115019	0.19838	-1.69698	1.14792e-06	7.10006e-06	proline-serine-threonine phosphatase interacting protein 1
PTAFR	1.04469	0.285116	0.237912	0.894723	2.00142	0.337346	0.271335	0.246666	-1.87345	4.75108e-40	1.52412e-38	platelet-activating factor receptor
PTGDS	78.8467	25.4107	50.9913	27.9788	157.57	11.738	34.7925	29.7017	-1.63361	0	0	prostaglandin D2 synthase 21kDa (brain)
PTGER1	0.37789	0.789806	0.758941	0.0909696	0.283758	0.810788	1.21002	0.348611	1.06353	3.43108e-05	0.000174409	prostaglandin E receptor 1 (subtype EP1), 42kDa
PTPN6	1.58043	0.348332	0.286759	1.01307	3.44147	0.287294	0.363929	0.393772	-2.18179	1.34302e-40	4.35439e-39	protein tyrosine phosphatase, non-receptor type 6
PTPN7	0.388948	0.0968415	0.102793	0.303745	0.760306	0.140981	0.0378645	0.111679	-2.00588	4.61307e-17	8.754e-16	protein tyrosine phosphatase, non-receptor type 7
PTPRC	0.997192	0.243175	0.179206	0.57094	2.24143	0.189279	0.238657	0.301588	-2.03588	2.52093e-68	1.12179e-66	protein tyrosine phosphatase, receptor type, C
PTPRE	1.18162	0.545618	0.394877	1.28423	1.86574	0.668992	0.505578	0.462285	-1.1148	4.32382e-27	1.09918e-25	protein tyrosine phosphatase, receptor type, E
PTPRN2	0.524232	0.211505	0.11969	0.528908	0.924097	0.177928	0.0754026	0.381183	-1.30952	4.25481e-14	5.0607e-13	protein tyrosine phosphatase, receptor type, N polypeptide 2
PTPRO	0.137309	0.0489964	0.0453963	0.105805	0.260725	0.0685824	0.0246542	0.0537526	-1.48668	4.31801e-08	3.14193e-07	protein tyrosine phosphatase, receptor type, O
RAB11FIP4	0.106789	0.0354429	0.0602863	0.146129	0.113953	0.0340022	0.0247375	0.047589	-1.5912	2.15832e-06	1.28419e-05	RAB11 family interacting protein 4 (class II)
RAB20	15.8221	7.08934	2.62901	17.8825	26.9548	2.51263	9.64794	9.10746	-1.15822	4.25287e-85	2.10062e-83	RAB20, member RAS oncogene family
RAB39A	0.220917	0.0281889	0.0216141	0.117879	0.523258	0.0352657	0.049301	0	-2.97031	5.36752e-07	3.45654e-06	RAB39A, member RAS oncogene family
RAB3B	3.46691	7.22126	6.34541	3.18414	0.871173	17.8131	2.40381	1.44688	1.0586	2.22045e-16	3.87412e-15	RAB3B, member RAS oncogene family
RAB42	1.84022	0.84116	0.967963	2.38801	2.1647	0.69145	1.03569	0.79634	-1.12943	3.11942e-09	2.54807e-08	RAB42, member RAS oncogene family
RAI2	0.277124	0.102183	0.105351	0.271076	0.454945	0.183351	0.0457718	0.0774268	-1.43937	3.58395e-06	2.07789e-05	retinoic acid induced 2
RAMP3	1.68502	0.468113	0.371723	1.25957	3.42377	0.233272	0.456556	0.714511	-1.84784	9.58102e-19	1.95918e-17	receptor (G protein-coupled) activity modifying protein 3
RANBP17	0.1778	0.389637	0.269934	0.106166	0.157301	0.646877	0.329846	0.192187	1.13187	6.9723e-06	3.89613e-05	RAN binding protein 17
RARRES3	30.7825	3.19745	3.22227	5.97758	83.1476	1.56082	3.46168	4.56986	-3.26711	0	0	retinoic acid receptor responder (tazarotene induced) 3
RASAL3	0.261994	0.0968864	0.0292677	0.201367	0.555346	0.057304	0.160221	0.0731342	-1.43517	4.92958e-06	2.80441e-05	RAS protein activator like 3
RASD1	9.26953	4.32297	2.65819	15.0757	10.0747	2.71146	4.73704	5.5204	-1.10047	2.23555e-49	8.10411e-48	RAS, dexamethasone-induced 1
RASSF5	0.649524	0.216476	0.129934	0.537318	1.28132	0.312955	0.169358	0.167115	-1.58518	2.31932e-20	5.03565e-19	Ras association (RalGDS/AF-6) domain family member 5
RBM47	0.733644	0.295996	0.238525	0.886746	1.07566	0.287394	0.217627	0.382968	-1.3095	3.06683e-19	6.35699e-18	RNA binding motif protein 47
RBP7	1.1769	0.134796	0.264615	2.68897	0.577127	0.0639628	0.210774	0.129651	-3.12615	5.82486e-10	5.07234e-09	retinol binding protein 7, cellular
RCSD1	0.497738	0.135551	0.167406	0.243107	1.0827	0.0420217	0.109099	0.255532	-1.87655	9.41423e-13	1.01744e-11	RCSD domain containing 1
RENBP	2.55626	0.954909	0.903338	2.05414	4.71131	0.840191	0.571647	1.45289	-1.4206	2.08458e-22	4.77838e-21	renin binding protein
RGCC	5.35041	2.19657	0.851668	7.00006	8.1995	1.13436	1.9936	3.46176	-1.28439	1.05773e-26	2.65823e-25	regulator of cell cycle
RGS1	0.917233	0.217757	0.205896	1.85425	0.691552	0.20903	0.313095	0.131145	-2.07457	1.14053e-10	1.06181e-09	regulator of G-protein signaling 1
RGS20	0.436673	1.22308	0.283822	0.840493	0.185705	1.71614	0.799715	1.15339	1.48589	6.17506e-13	6.80098e-12	regulator of G-protein signaling 20
RGS6	0.0638253	0.00537374	0.0209751	0.13325	0.0372509	0	0.0117168	0.00440442	-3.57013	6.21044e-06	3.49319e-05	regulator of G-protein signaling 6
RHEBL1	0.804509	0.298926	0.425413	0.617784	1.37033	0.142381	0.213265	0.541132	-1.42832	4.20617e-06	2.414e-05	Ras homolog enriched in brain like 1
RHOH	0.534242	0.111493	0.192678	0.735579	0.67447	0.0419166	0.0376707	0.254893	-2.26054	7.23494e-11	6.82996e-10	ras homolog family member H
RHOU	0.891194	0.416283	0.169996	0.798075	1.70551	0.290575	0.509095	0.44918	-1.09817	3.7068e-17	7.07853e-16	ras homolog family member U
RNASE1	15.8142	2.95366	6.07524	18.1408	23.2267	2.74265	2.1349	3.98344	-2.42065	4.47323e-153	2.76043e-151	ribonuclease, RNase A family, 1 (pancreatic)
RNASE2	0.588057	0.146865	0.0262015	1.27509	0.46288	0.171002	0	0.269593	-2.00147	0.000141927	0.000654252	ribonuclease, RNase A family, 2 (liver, eosinophil-derived neurotoxin)
RNASE6	1.41442	0.248724	0.0544528	0.685327	3.50347	0.296152	0.236581	0.213438	-2.50759	1.33398e-19	2.80587e-18	ribonuclease, RNase A family, k6
RNF157	0.12359	0.0318453	0.0472495	0.135452	0.188069	0.0556781	0.00513213	0.0347257	-1.95641	1.31804e-06	8.09652e-06	ring finger protein 157
RNU6ATAC	62.5115	146.694	96.2906	21.5877	69.6562	29.9973	147.395	262.691	1.23062	0	0	RNA, U6atac small nuclear (U12-dependent splicing)
RPS17	0.795039	4.4524	2.28318	0.0499747	0.0519613	0	4.17923	9.17796	2.48549	0	0	ribosomal protein S17
RPS17L	0.795039	4.4524	2.28318	0.0499747	0.0519613	0	4.17923	9.17796	2.48549	0	0	ribosomal protein S17-like
RPS4Y1	0.0340996	32.9204	0	0.0180139	0.084285	0	98.6981	0.0631153	9.91501	0	0	ribosomal protein S4, Y-linked 1
RPS6KA1	1.28743	0.618807	0.495258	1.25141	2.11562	0.835931	0.526808	0.493682	-1.05693	4.05123e-18	8.11316e-17	ribosomal protein S6 kinase, 90kDa, polypeptide 1
RSAD2	5.04792	0.348249	0.0274176	0.165634	14.9507	0.0775403	0.189403	0.777804	-3.8575	9.95438420806962e-315	7.76249922230115e-313	radical S-adenosyl methionine domain containing 2
RTN4RL1	3.74629	1.10189	2.59899	5.59725	3.04263	0.98648	0.614838	1.70434	-1.76549	6.28354e-71	2.83777e-69	reticulon 4 receptor-like 1
RTP4	4.02023	0.521264	0.380972	0.799133	10.8806	0.248639	0.33518	0.979973	-2.94719	2.59733e-58	1.03094e-56	receptor (chemosensory) transporter protein 4
S100A4	15.1492	7.22403	8.94615	21.2868	15.2146	5.94264	7.89978	7.82966	-1.06836	5.05115e-25	1.23738e-23	S100 calcium binding protein A4
S100A8	6.3578	1.73728	0.441869	6.27184	12.3597	0.841116	1.7998	2.57092	-1.8717	6.66695e-27	1.68775e-25	S100 calcium binding protein A8
S100A9	32.9847	5.51859	2.93711	24.6718	71.3452	4.02982	6.98224	5.5437	-2.57943	2.85213e-220	2.02844e-218	S100 calcium binding protein A9
S1PR3	4.7964	1.95586	1.06648	8.41802	4.9047	3.35127	0.426172	2.09014	-1.29415	1.53344e-105	8.19138e-104	sphingosine-1-phosphate receptor 3
S1PR4	0.244778	0.0259512	0	0.14183	0.592505	0	0.0157375	0.0621162	-3.2376	5.36752e-07	3.45654e-06	sphingosine-1-phosphate receptor 4
SAMD9L	5.73764	2.09627	1.50382	1.09641	14.6127	3.35376	1.13137	1.80368	-1.45263	8.28954e-294	6.40248e-292	sterile alpha motif domain containing 9-like
SAMHD1	7.74852	2.68135	2.63297	4.13969	16.4729	2.73918	2.18032	3.12454	-1.53096	8.10967e-160	5.04296e-158	SAM domain and HD domain 1
SAMSN1	0.828068	0.171805	0.197435	0.60741	1.67936	0.107379	0.166198	0.241839	-2.26898	3.44533e-20	7.42062e-19	SAM domain, SH3 domain and nuclear localization signals 1
SASH3	0.776882	0.244772	0.164477	0.594018	1.57215	0.178908	0.219042	0.336365	-1.66626	9.27546e-16	1.21331e-14	SAM and SH3 domain containing 3
SBSN	0.965727	0.351484	0.921209	1.36688	0.609093	0.474648	0.259102	0.320701	-1.45816	6.20583e-10	5.39246e-09	suprabasin
SCARA5	8.85887	2.60683	0.927879	17.8868	7.76193	0.903314	1.85039	5.0668	-1.76482	2.32702e-215	1.64055e-213	scavenger receptor class A, member 5 (putative)
SCG2	11.9064	4.13011	2.83032	14.0224	18.8666	1.18096	2.84488	8.3645	-1.52749	5.61094e-164	3.50713e-162	secretogranin II
SCGB1A1	4.23388	1.42455	0	7.04252	5.65912	0.0463447	0	4.2273	-1.57148	5.81942e-12	5.95245e-11	secretoglobin, family 1A, member 1 (uteroglobin)
SCIMP	0.388183	0.156385	0.143065	0.293427	0.728058	0.250717	0.119135	0.0993031	-1.31164	1.40927e-06	8.62638e-06	SLP adaptor and CSK interacting membrane protein
SCO2	34.4866	16.0692	11.9089	19.9961	71.5548	14.1552	17.0264	17.026	-1.10174	9.82824e-187	6.49467e-185	SCO2 cytochrome c oxidase assembly protein
SDPR	0.424125	0.194709	0.266651	0.67617	0.329554	0.174028	0.0965433	0.313557	-1.12317	1.17419e-05	6.35637e-05	serum deprivation response
SDS	4.94585	0.621891	1.09257	6.98119	6.76379	0.535449	0.500773	0.829451	-2.99148	2.1487e-98	1.13037e-96	serine dehydratase
SECTM1	4.22974	0.656257	0.39664	2.56326	9.72931	1.15663	0.148496	0.663645	-2.68824	1.42188e-129	8.1521e-128	secreted and transmembrane 1
SELL	0.148356	0.0398237	0.0231561	0.0582871	0.363625	0.0419796	0.0150909	0.0624007	-1.89736	8.68785e-05	0.000414923	selectin L
SELPLG	1.15639	0.476952	0.463468	1.09116	1.91453	0.594424	0.297537	0.538895	-1.27771	3.81468e-17	7.27881e-16	selectin P ligand
SEMA3G	0.189536	0.0614024	0.0204874	0.419433	0.128687	0.0311989	0.0988029	0.0542053	-1.6261	1.54288e-05	8.22554e-05	sema domain, immunoglobulin domain (Ig), short basic domain, secreted, (semaphorin) 3G
SERPINA1	0.310337	0.143066	0.083572	0.232275	0.615164	0.113631	0.204241	0.111325	-1.11716	7.42351e-06	4.13019e-05	serpin peptidase inhibitor, clade A (alpha-1 antiproteinase, antitrypsin), member 1
SERPINB2	0.995365	3.07793	0.453446	1.75311	0.779539	8.6944	0.0231775	0.516221	1.62866	0	0	serpin peptidase inhibitor, clade B (ovalbumin), member 2
SERPING1	10.8016	4.87733	8.60449	8.12406	15.6761	6.69738	4.5443	3.3903	-1.14708	1.57675e-83	7.69405e-82	serpin peptidase inhibitor, clade G (C1 inhibitor), member 1
SFMBT2	0.189129	0.0582687	0.0429869	0.23845	0.285951	0.0623447	0.0264584	0.0860029	-1.69858	5.72275e-12	5.85851e-11	Scm-like with four mbt domains 2
SFRP2	0.596164	0.165753	0.793551	0.722666	0.272275	0.178951	0.0693754	0.248933	-1.84667	5.39408e-08	3.88528e-07	secreted frizzled-related protein 2
SFRP4	9.01188	1.97918	2.70767	16.4955	7.83247	0.535497	1.87436	3.52769	-2.18692	2.52341e-203	1.72388e-201	secreted frizzled-related protein 4
SFTPA1	0.451354	0.202881	0.0507238	0.794447	0.508892	0.0183914	0	0.590252	-1.15363	9.16416e-05	0.000435697	surfactant protein A1
SFTPA2	0.710813	0.239831	0.00874972	1.35082	0.772868	0	0.00570224	0.71379	-1.56745	1.19259e-09	1.00987e-08	surfactant protein A2
SFTPB	0.312719	0.152417	0.021007	0.49793	0.419219	0.0228501	0.0136904	0.42071	-1.03684	9.06951e-05	0.000431451	surfactant protein B
SFTPC	1.03492	0.305531	0	1.87542	1.22933	0	0	0.916592	-1.76013	5.09718e-09	4.08246e-08	surfactant protein C
SHE	0.341209	0.108395	0.0996701	0.373712	0.550245	0.0542075	0.0649556	0.206021	-1.65436	1.89597e-14	2.3025e-13	Src homology 2 domain containing E
SHISA2	0.583317	1.18963	0.546613	0.889304	0.314034	2.58131	0.399674	0.587897	1.02816	1.76893e-06	1.06663e-05	shisa homolog 2 (Xenopus laevis)
SIGLEC1	0.413877	0.122084	0.1089	0.341444	0.791288	0.052993	0.136339	0.17692	-1.76133	1.22557e-20	2.68011e-19	sialic acid binding Ig-like lectin 1, sialoadhesin
SIGLEC10	0.201077	0.0818415	0.06809	0.204719	0.330423	0.104924	0.107239	0.0333615	-1.29685	0.000129483	0.000600883	sialic acid binding Ig-like lectin 10
SIGLEC11	0.097361	0.0092527	0	0.0970019	0.195081	0	0.0277581	0	-3.3954	7.9325e-06	4.39221e-05	sialic acid binding Ig-like lectin 11
SIGLEC12	0.254772	0.00637837	0.0173575	0.0655369	0.681421	0	0	0.0191351	-5.31987	7.66774e-13	8.36518e-12	sialic acid binding Ig-like lectin 12 (gene/pseudogene)
SIGLEC7	0.437534	0.138888	0.0439182	0.31322	0.955463	0.155257	0.164575	0.096832	-1.65547	5.6365e-07	3.62302e-06	sialic acid binding Ig-like lectin 7
SIGLEC9	0.37837	0.107115	0.0667361	0.375965	0.69241	0.134813	0.130477	0.0560539	-1.82064	2.51019e-07	1.68215e-06	sialic acid binding Ig-like lectin 9
SIT1	0.235303	0.0303839	0.062324	0.0522928	0.591291	0.0338961	0	0.0572557	-2.95314	1.48783e-05	7.95475e-05	signaling threshold regulating transmembrane adaptor 1
SLA	0.958823	0.290082	0.260892	0.835398	1.78018	0.237451	0.284532	0.348264	-1.7248	1.65151e-25	4.07865e-24	Src-like-adaptor
SLAMF1	0.233078	0.0276649	0.0673698	0.209955	0.42191	0.0209373	0.0125444	0.0495129	-3.07469	4.12287e-07	2.69364e-06	signaling lymphocytic activation molecule family member 1
SLAMF7	2.02882	0.404951	0.427636	1.642	4.01683	0.504576	0.236181	0.474096	-2.32482	1.99897e-58	7.94737e-57	SLAM family member 7
SLAMF8	1.50134	0.379349	0.554401	0.700201	3.24943	0.507826	0.304258	0.325962	-1.98466	2.39836e-46	8.36908e-45	SLAM family member 8
SLC14A1	5.02372	1.54135	12.8257	1.42757	0.81789	0.575982	3.77056	0.277522	-1.70456	5.76094e-69	2.5873e-67	solute carrier family 14 (urea transporter), member 1 (Kidd blood group)
SLC15A3	6.94302	1.91082	1.5472	3.65017	15.6317	1.63345	2.36659	1.73241	-1.86137	3.11848e-120	1.72277e-118	solute carrier family 15, member 3
SLC16A10	0.29457	0.0773109	0.0799369	0.503031	0.300741	0.0797046	0.0347302	0.117498	-1.92986	9.36876e-08	6.56833e-07	solute carrier family 16, member 10 (aromatic amino acid transporter)
SLC16A6	1.09004	0.531801	0.21425	2.07139	0.984473	1.03282	0.190402	0.372181	-1.03542	5.6964e-18	1.13516e-16	solute carrier family 16, member 6 (monocarboxylic acid transporter 7)
SLC19A3	0.945835	0.123917	0.102246	1.45413	1.28113	0.150144	0.0299856	0.191621	-2.93222	9.84443e-46	3.39129e-44	solute carrier family 19, member 3
SLC2A5	5.25525	1.96066	1.38281	2.94305	11.4399	0.146745	3.65309	2.08214	-1.42242	3.46744e-74	1.61406e-72	solute carrier family 2 (facilitated glucose/fructose transporter), member 5
SLC35E2	0.811112	1.94258	0.994972	0.595674	0.842689	3.6602	1.29858	0.868963	1.26	0	0	solute carrier family 35, member E2
SLC37A2	1.2393	0.34033	0.468143	1.77528	1.47448	0.424348	0.320047	0.276596	-1.86452	1.01699e-38	3.18658e-37	solute carrier family 37 (glycerol-3-phosphate transporter), member 2
SLC40A1	2.86671	1.10431	0.579753	4.8355	3.18489	0.786713	0.89781	1.6284	-1.37626	5.16121e-44	1.74331e-42	solute carrier family 40 (iron-regulated transporter), member 1
SLC47A1	0.477125	0.201131	0.146829	0.650479	0.634066	0.229985	0.0842068	0.289202	-1.24623	2.94779e-08	2.18356e-07	solute carrier family 47, member 1
SLC5A12	0.0317321	0.0938498	0.052357	0.0206729	0.0221664	0.0435505	0.174621	0.0633778	1.56441	3.12931e-05	0.00015984	solute carrier family 5 (sodium/glucose cotransporter), member 12
SLC6A12	0.0943023	0.0166178	0.0387975	0.0854515	0.158658	0.0158256	0.0126423	0.0213855	-2.50456	2.52999e-05	0.000131358	solute carrier family 6 (neurotransmitter transporter, betaine/GABA), member 12
SLC7A11-AS1	0.491372	1.01553	0.637248	0.493018	0.34385	1.44483	0.531258	1.07049	1.04734	2.86882e-12	2.99245e-11	SLC7A11 antisense RNA 1
SLC7A2	2.25044	0.609001	0.814069	3.76496	2.1723	0.205371	0.848534	0.773097	-1.88569	1.00212e-109	5.42485e-108	solute carrier family 7 (cationic amino acid transporter, y+ system), member 2
SLC7A7	1.9523	0.869081	0.928188	1.26628	3.66243	0.554909	0.932755	1.11958	-1.16761	4.92127e-22	1.11438e-20	solute carrier family 7 (amino acid transporter light chain, y+L system), member 7
SLCO2B1	2.28757	0.462393	0.480263	2.52669	3.85577	0.39533	0.549848	0.442002	-2.30663	2.54599e-99	1.34521e-97	solute carrier organic anion transporter family, member 2B1
SLCO4A1	0.188606	0.02691	0.0346868	0.22701	0.304121	0.0377302	0.0226056	0.0203943	-2.80916	1.6423e-07	1.12226e-06	solute carrier organic anion transporter family, member 4A1
SLPI	3.47139	1.44975	1.41699	3.53973	5.45746	0.665566	1.3642	2.31949	-1.25971	1.06671e-09	9.07078e-09	secretory leukocyte peptidase inhibitor
SMOC2	5.41972	2.34335	0.892599	6.29411	9.07244	0.771411	2.64161	3.61704	-1.20964	4.33669e-66	1.87141e-64	SPARC related modular calcium binding 2
SMPDL3B	0.235135	0.0391131	0.0508801	0.377102	0.277424	0.0184481	0.0552648	0.0436263	-2.58777	1.10129e-06	6.82904e-06	sphingomyelin phosphodiesterase, acid-like 3B
SMTNL2	0.861274	0.228658	0.136241	1.04227	1.40531	0.0348694	0.297705	0.353399	-1.91328	2.26589e-16	3.94773e-15	smoothelin-like 2
SNCA	0.160558	0.0472296	0.0553553	0.209006	0.217314	0.0120424	0.0360754	0.0935709	-1.76534	0.000139339	0.000643175	synuclein, alpha (non A4 component of amyloid precursor)
SNCAIP	1.31911	0.456174	0.597848	2.01981	1.33968	0.24746	0.568916	0.552147	-1.53191	7.79865e-24	1.83981e-22	synuclein, alpha interacting protein
SND1-IT1	0.246244	0.602266	0.412299	0.30191	0.0245244	1.55743	0.161219	0.0881502	1.29031	6.85392e-05	0.000332642	SND1 intronic transcript 1 (non-protein coding)
SNORA14B	5.31591	12.1434	6.13407	5.14677	4.66689	4.81024	12.6436	18.9763	1.19178	3.49747e-08	2.57266e-07	small nucleolar RNA, H/ACA box 14B
SNORA16A	6.66256	14.1404	12.216	2.41171	5.35996	8.59798	9.74079	24.0823	1.08567	5.31509e-08	3.83408e-07	small nucleolar RNA, H/ACA box 16A
SNORA34	14.7223	29.9247	29.098	5.77931	9.2895	10.0916	30.5063	49.1761	1.02334	0	0	small nucleolar RNA, H/ACA box 34
SNORA38B	4.80115	10.809	4.37685	3.91721	6.10939	2.06304	11.5998	18.7643	1.17079	6.53617e-07	4.17475e-06	small nucleolar RNA, H/ACA box 38B
SNORA46	6.66943	16.8532	12.6961	3.112	4.2002	1.24135	16.0834	33.2348	1.33739	2.53131e-14	3.05267e-13	small nucleolar RNA, H/ACA box 46
SNORA6	24.4613	51.0482	29.0811	18.0021	26.3006	20.2449	53.4876	79.4122	1.06136	0	0	small nucleolar RNA, H/ACA box 6
SNORA71D	23.297	48.8592	41.7259	8.89887	19.2662	12.2955	59.2063	75.0757	1.06849	0	0	small nucleolar RNA, H/ACA box 71D
SNORA72	6.15038	12.97	8.89959	3.06032	6.49122	1.11087	11.3146	26.4844	1.07643	5.9505e-08	4.26075e-07	small nucleolar RNA, H/ACA box 72
SNORA8	30.6805	63.7696	35.3297	23.7146	32.9973	23.0577	64.2881	103.963	1.05555	0	0	small nucleolar RNA, H/ACA box 8
SNORD12	13.5605	28.8575	16.0484	10.7723	13.8607	14.6635	26.7747	45.1343	1.08954	3.49532e-10	3.10167e-09	small nucleolar RNA, C/D box 12
SNORD22	28.3857	64.7605	55.9403	10.5158	18.7009	16.7915	48.31	129.18	1.18995	0	0	small nucleolar RNA, C/D box 22
SNX10	1.35988	0.349321	0.281047	0.605608	3.19299	0.402976	0.0957428	0.549245	-1.96085	8.14881e-40	2.59691e-38	sorting nexin 10
SNX20	0.115983	0.0107416	0.00437287	0.0660428	0.277534	0.00475654	0.0113993	0.016069	-3.43263	1.89111e-09	1.57173e-08	sorting nexin 20
SOCS1	1.48841	0.589001	0.649328	0.717564	3.09834	0.861341	0.381886	0.523777	-1.33743	6.68142e-12	6.79974e-11	suppressor of cytokine signaling 1
SOD2	82.7101	31.9836	23.8584	38.926	185.346	27.2262	33.8549	34.8697	-1.37073	0	0	superoxide dismutase 2, mitochondrial
SOD3	1.48977	0.721376	1.92707	0.729192	1.81304	0.465811	0.763381	0.934935	-1.04626	6.71728e-07	4.2814e-06	superoxide dismutase 3, extracellular
SORL1	0.0857654	0.0348443	0.0737119	0.119278	0.0643064	0.0400897	0.0205879	0.0438552	-1.29948	4.55805e-05	0.000227733	sortilin-related receptor, L(DLR class) A repeats containing
SOX18	0.614151	0.21106	0.395328	0.530718	0.916408	0.0737166	0.169305	0.390158	-1.54094	6.88064e-07	4.37977e-06	SRY (sex determining region Y)-box 18
SOX6	0.152699	0.378782	0.215967	0.115627	0.126504	0.357967	0.675587	0.102792	1.31067	0	0	SRY (sex determining region Y)-box 6
SP140	0.160108	0.0461299	0.0432039	0.203907	0.233214	0.0528688	0.0140781	0.0714428	-1.79527	9.88642e-06	5.40865e-05	SP140 nuclear body protein
SPI1	1.57258	0.42219	0.341941	1.13614	3.23965	0.505842	0.418949	0.341778	-1.89717	2.49479e-20	5.4021e-19	spleen focus forming virus (SFFV) proviral integration oncogene spi1
SPN	0.171955	0.0415547	0.035577	0.140069	0.340218	0.0744202	0.0160517	0.0341923	-2.04894	2.36684e-13	2.67602e-12	sialophorin
SPOCK2	0.169786	0.042833	0.0338672	0.0826653	0.392825	0.0971201	0.020065	0.0113138	-1.98692	2.98031e-12	3.10075e-11	sparc/osteonectin, cwcv and kazal-like domains proteoglycan (testican) 2
SPON1	9.3778	2.92797	1.84821	15.4948	10.7904	3.05022	2.00585	3.72783	-1.67935	3.07924e-300	2.38587e-298	spondin 1, extracellular matrix protein
SPP1	34.1846	8.8309	7.87736	15.1341	79.5422	15.2316	5.90862	5.35247	-1.95271	0	0	secreted phosphoprotein 1
SPRY1	1.8115	0.888426	0.531957	3.35284	1.5497	0.661292	1.25465	0.749336	-1.02786	4.01391e-15	5.0648e-14	sprouty homolog 1, antagonist of FGF signaling (Drosophila)
SPTA1	0.116884	0.0260506	0.0192173	0.163258	0.168176	0.0365809	0.00626201	0.035309	-2.16568	5.48659e-10	4.79326e-09	spectrin, alpha, erythrocytic 1 (elliptocytosis 2)
SQRDL	17.1251	8.42054	8.50221	12.9995	29.8737	11.4785	7.27465	6.50846	-1.02413	1.63535e-138	9.69694e-137	sulfide quinone reductase-like (yeast)
SSTR2	1.0773	0.208143	0.116952	0.921317	2.19363	0.0282696	0.304874	0.291286	-2.37177	9.36171e-33	2.64924e-31	somatostatin receptor 2
ST14	0.592691	0.158334	0.175074	0.690408	0.91259	0.298348	0.0608516	0.115802	-1.90431	2.37241e-18	4.78666e-17	suppression of tumorigenicity 14 (colon carcinoma)
ST8SIA4	0.6139	0.257122	0.201697	1.011	0.629002	0.105423	0.151932	0.514012	-1.25555	1.38213e-17	2.70973e-16	ST8 alpha-N-acetyl-neuraminide alpha-2,8-sialyltransferase 4
STAP1	0.277411	0.0542252	0.0382359	0.235266	0.55873	0.0138635	0.00830618	0.140506	-2.35499	1.74382e-05	9.23187e-05	signal transducing adaptor family member 1
STMN2	1.20836	0.274455	0.233938	1.69647	1.69466	0.0999678	0.201464	0.521934	-2.1384	1.74429e-24	4.20503e-23	stathmin-like 2
STRA6	0.102562	0.029527	0.0216383	0.184582	0.101466	0.0470737	0.00705092	0.0344564	-1.79639	1.71406e-05	9.08221e-05	stimulated by retinoic acid 6
STX11	0.39686	0.127306	0.104968	0.199632	0.88598	0.18649	0.120855	0.0745739	-1.64033	6.33011e-18	1.25938e-16	syntaxin 11
STXBP2	0.900438	0.231034	0.223254	0.61083	1.86723	0.295634	0.183452	0.214016	-1.96252	1.80856e-17	3.50889e-16	syntaxin binding protein 2
SUCNR1	0.742464	0.0937312	0.151731	0.166481	1.90918	0.126956	0.068458	0.0857795	-2.98572	9.92309e-19	2.02742e-17	succinate receptor 1
SYK	0.839352	0.34913	0.203061	0.751486	1.56351	0.193267	0.427728	0.426394	-1.26551	6.13922e-21	1.356e-19	spleen tyrosine kinase
SYNGR1	0.362535	0.154486	0.29838	0.422286	0.36694	0.160325	0.171028	0.132104	-1.23065	3.84028e-08	2.81543e-07	synaptogyrin 1
TAGAP	0.730108	0.191377	0.0919113	0.902734	1.19568	0.147023	0.109228	0.31788	-1.93169	2.47977e-22	5.66818e-21	T-cell activation RhoGTPase activating protein
TAPBPL	9.97618	3.1753	2.09742	4.51513	23.316	2.50037	2.96162	4.06391	-1.6516	7.80401e-131	4.4849e-129	TAP binding protein-like
TBC1D30	0.0965858	0.027124	0.0566126	0.144567	0.0885779	0.0187416	0.0336865	0.028944	-1.83224	9.99382e-06	5.46248e-05	TBC1 domain family, member 30
TBX21	0.0760426	0.00162657	0	0.0125649	0.215563	0	0.00487972	0	-5.5469	2.49455e-05	0.000129712	T-box 21
TC2N	0.134775	0.0360433	0.0617248	0.0670223	0.275579	0.0236966	0.0283951	0.0560381	-1.90276	4.33137e-07	2.8215e-06	tandem C2 domains, nuclear
TCN2	3.26101	1.31851	1.63583	2.69828	5.44891	1.01099	1.38711	1.55744	-1.30641	1.69326e-31	4.6985e-30	transcobalamin II
TDRD9	0.535651	0.206699	0.367861	0.96666	0.272431	0.241841	0.155434	0.222821	-1.37376	1.27028e-11	1.26673e-10	tudor domain containing 9
TEK	0.363936	0.173753	0.21852	0.322558	0.550731	0.123248	0.213617	0.184393	-1.06665	1.09948e-06	6.82131e-06	TEK tyrosine kinase, endothelial
TENM3	0.588397	1.1829	1.12591	0.505233	0.134049	2.80208	0.345984	0.400648	1.00747	0	0	teneurin transmembrane protein 3
TF	7.90814	0.346111	0.317404	5.38423	18.0228	0.120088	0.314778	0.603468	-4.51403	0	0	transferrin
TFEC	0.346995	0.111808	0.0817815	0.208222	0.750981	0.101227	0.0974057	0.13679	-1.6339	5.55331e-18	1.10847e-16	transcription factor EC
THEMIS2	3.55732	1.57213	1.13283	3.28516	6.25398	1.1013	1.51807	2.09702	-1.17807	7.50899e-40	2.39616e-38	thymocyte selection associated family member 2
THSD7B	0.126985	0.0449818	0.0922545	0.185221	0.103478	0.0537583	0.0279142	0.0532728	-1.49724	6.68537e-05	0.000324852	thrombospondin, type I, domain containing 7B
TIE1	1.06182	0.439809	0.256324	1.27417	1.65498	0.0789094	0.639824	0.600693	-1.2716	1.97648e-17	3.82855e-16	tyrosine kinase with immunoglobulin-like and EGF-like domains 1
TIGIT	0.182114	0.0602789	0.0389315	0.0871077	0.420303	0.0776367	0.0507438	0.0524561	-1.59512	2.43539e-05	0.000126799	T cell immunoreceptor with Ig and ITIM domains
TIMP4	3.00319	1.3677	1.33262	5.32349	2.35345	1.09036	0.637907	2.37483	-1.13474	8.78946e-17	1.64858e-15	TIMP metallopeptidase inhibitor 4
TIPARP	3.74102	7.62008	3.78786	4.54792	2.88729	16.0461	3.96467	2.84947	1.02637	0	0	TCDD-inducible poly(ADP-ribose) polymerase
TIPARP-AS1	1.45698	2.92977	1.49188	1.82363	1.05542	5.96391	1.58425	1.24115	1.00781	6.37046e-13	7.00029e-12	TIPARP antisense RNA 1
TLDC2	1.54581	0.635554	0.528395	0.688774	3.42025	0.636337	0.424299	0.846027	-1.28227	3.51682e-18	7.06627e-17	TBC/LysM-associated domain containing 2
TLR1	0.935587	0.321616	0.324234	0.997507	1.48502	0.279206	0.228914	0.456728	-1.54053	6.06927e-17	1.14457e-15	toll-like receptor 1
TLR2	0.965914	0.263381	0.198129	0.603212	2.0964	0.09852	0.350473	0.341151	-1.87474	6.66695e-27	1.68775e-25	toll-like receptor 2
TLR3	2.28547	0.68811	0.360971	1.78004	4.71539	0.771507	0.226993	1.06583	-1.73178	1.35545e-55	5.21783e-54	toll-like receptor 3
TLR8	0.249669	0.0665257	0.068518	0.199298	0.48119	0.0546551	0.0744226	0.0704995	-1.90803	8.87253e-10	7.60879e-09	toll-like receptor 8
TM4SF19	4.54155	0.724465	1.29115	0.732396	11.6011	1.78027	0.16592	0.227206	-2.6482	8.15371e-69	3.64841e-67	transmembrane 4 L six family member 19
TM4SF19-TCTEX1D2	4.26986	1.1693	1.50932	1.47478	9.82548	2.11972	0.784415	0.603775	-1.86854	4.06349e-41	1.32457e-39	TM4SF19-TCTEX1D2 readthrough
TMC6	0.9048	0.289687	0.2474	0.950499	1.5165	0.184125	0.369136	0.315801	-1.6431	1.22643e-17	2.41032e-16	transmembrane channel-like 6
TMC8	0.152674	0.0405219	0.0348642	0.186486	0.236671	0.0284424	0.0482826	0.0448406	-1.91368	2.00395e-06	1.1997e-05	transmembrane channel-like 8
TMEM130	0.266107	0.101441	0.433543	0.200334	0.164445	0.13669	0.0614224	0.10621	-1.39137	0.000162738	0.000743683	transmembrane protein 130
TMEM132C	0.265531	0.0650933	0.0389289	0.525877	0.231788	0.0338756	0.0355183	0.125886	-2.0283	6.67384e-11	6.31749e-10	transmembrane protein 132C
TMEM140	11.0907	5.11444	4.41391	7.75292	21.1053	5.42298	4.67213	5.2482	-1.1167	8.39044e-94	4.31112e-92	transmembrane protein 140
TMEM144	0.661344	0.298567	0.446918	0.564914	0.972199	0.340923	0.0983473	0.456431	-1.14734	2.99518e-10	2.67252e-09	transmembrane protein 144
TMEM158	3.07773	1.43653	2.55877	3.74626	2.92817	1.67898	1.51904	1.11158	-1.09928	1.03817e-18	2.11934e-17	transmembrane protein 158 (gene/pseudogene)
TMEM176A	13.8369	3.15721	3.54364	6.42914	31.5379	0.928323	3.78454	4.75878	-2.1318	3.56668e-131	2.05461e-129	transmembrane protein 176A
TMEM176B	19.7263	5.54899	4.16703	9.91916	45.0926	1.23959	7.07427	8.33312	-1.82982	5.33483e-246	3.92061e-244	transmembrane protein 176B
TMEM229B	1.54996	0.571874	0.785853	1.13205	2.73199	0.520091	0.391822	0.803708	-1.43847	1.30162e-35	3.87798e-34	transmembrane protein 229B
TMEM51	0.788992	0.375422	0.189311	0.786986	1.39068	0.589684	0.403774	0.132809	-1.0715	7.57203e-09	5.95257e-08	transmembrane protein 51
TMSB4Y	0.00323105	0.125481	0	0.00969315	0	0	0.376444	0	5.27933	9.5448e-06	5.23238e-05	thymosin beta 4, Y-linked
TMTC2	0.902057	0.445924	0.401708	1.31817	0.986293	0.462911	0.451014	0.423848	-1.01642	5.32211e-14	6.27781e-13	transmembrane and tetratricopeptide repeat containing 2
TNFAIP8L2	0.774881	0.272296	0.245222	0.699561	1.37986	0.302303	0.298317	0.216269	-1.5088	7.88895e-07	4.97511e-06	tumor necrosis factor, alpha-induced protein 8-like 2
TNFRSF13B	0.416617	0.0685121	0.0850874	0.65443	0.510334	0.0771274	0.055452	0.0729568	-2.60429	2.01172e-07	1.36242e-06	tumor necrosis factor receptor superfamily, member 13B
TNFRSF14	9.70425	4.49245	3.79292	7.48253	17.8373	4.59231	3.96529	4.91975	-1.11111	7.86742e-67	3.40715e-65	tumor necrosis factor receptor superfamily, member 14
TNFRSF17	1.37446	0.355193	0.368113	1.6256	2.12968	0.252891	0.214649	0.59804	-1.95219	5.2972e-12	5.44354e-11	tumor necrosis factor receptor superfamily, member 17
TNFRSF18	0.94601	0.0853959	0.288872	0.942578	1.60658	0.0872825	0.0627532	0.106152	-3.46962	1.75727e-17	3.41485e-16	tumor necrosis factor receptor superfamily, member 18
TNFRSF1B	3.89593	1.74454	1.67166	4.37928	5.63684	1.90383	1.55047	1.77931	-1.15912	1.04671e-56	4.08771e-55	tumor necrosis factor receptor superfamily, member 1B
TNFRSF4	0.613084	0.148464	0.122108	0.541543	1.1756	0.0569234	0.170525	0.217945	-2.04597	7.45632e-07	4.72175e-06	tumor necrosis factor receptor superfamily, member 4
TNFSF10	1.84644	0.170358	0.251412	0.500997	4.78692	0.123062	0.217096	0.170915	-3.43811	5.0181e-90	2.546e-88	tumor necrosis factor (ligand) superfamily, member 10
TNFSF11	0.468088	0.113391	0.0706202	1.1673	0.166345	0.0998612	0.0690354	0.171276	-2.04548	1.94562e-10	1.77122e-09	tumor necrosis factor (ligand) superfamily, member 11
TNFSF12-TNFSF13	3.37196	1.38253	1.62206	2.07182	6.42199	1.47219	1.70349	0.971922	-1.28627	1.9876e-31	5.50267e-30	TNFSF12-TNFSF13 readthrough
TNFSF13	3.22252	0.799782	0.558452	1.99496	7.11414	0.699487	1.10287	0.596989	-2.01051	3.94588e-66	1.7058e-64	tumor necrosis factor (ligand) superfamily, member 13
TNFSF13B	3.54233	0.455439	0.237933	1.16152	9.22755	0.352921	0.197352	0.816045	-2.95937	3.52705e-135	2.07114e-133	tumor necrosis factor (ligand) superfamily, member 13b
TNFSF15	0.805727	0.196324	0.153723	0.365447	1.89801	0.275588	0.183668	0.129715	-2.03706	8.36818e-55	3.17598e-53	tumor necrosis factor (ligand) superfamily, member 15
TPRG1	0.212979	0.0655124	0.0631932	0.251855	0.323888	0.00572814	0.0514792	0.13933	-1.70087	4.97997e-06	2.83176e-05	tumor protein p63 regulated 1
TPSAB1	0.972415	0.183276	0.612905	0.879649	1.42469	0.0175442	0.473014	0.0592698	-2.40755	2.69208e-11	2.62519e-10	tryptase alpha/beta 1
TPSB2	1.09135	0.151036	0.231428	1.09573	1.94688	0.0719238	0.344738	0.0364471	-2.85314	2.93334e-16	5.08501e-15	tryptase beta 2 (gene/pseudogene)
TREM2	4.12604	1.00379	1.09525	2.80285	8.48003	1.07221	0.678091	1.26108	-2.0393	2.37105e-41	7.76015e-40	triggering receptor expressed on myeloid cells 2
TRIM21	9.00978	3.64005	3.43432	4.36421	19.2308	3.52931	3.14254	4.24829	-1.30753	1.22216e-91	6.23998e-90	tripartite motif containing 21
TRIM27	0.0725978	0.012682	0.0185026	0.121609	0.0776819	0.00167717	0.00803884	0.0283299	-2.51715	4.7481e-10	4.17819e-09	tripartite motif containing 27
TRIM47	7.40771	3.36368	5.106	5.16243	11.9547	3.14726	3.71028	3.2335	-1.13899	8.69607e-62	3.58668e-60	tripartite motif containing 47
TRPM2	0.25487	0.120833	0.0753422	0.219881	0.469388	0.124711	0.117415	0.120374	-1.07675	4.79175e-07	3.10471e-06	transient receptor potential cation channel, subfamily M, member 2
TSPAN33	0.520207	0.183662	0.353297	0.60449	0.602835	0.150704	0.094807	0.305474	-1.50204	1.47538e-08	1.12732e-07	tetraspanin 33
TTTY14	0	0.495527	0	0	0	0	1.48658	0	Inf	1.23848e-06	7.62714e-06	testis-specific transcript, Y-linked 14 (non-protein coding)
TTTY15	0	0.6241	0	0	0	0	1.8723	0	Inf	0	0	testis-specific transcript, Y-linked 15 (non-protein coding)
TXLNG2P	0	0.651777	0	0	0	0.0125964	1.93706	0.00567393	Inf	0	0	taxilin gamma 2, pseudogene
TYMP	73.478	11.2858	5.73183	15.9411	198.761	6.24601	16.1848	11.4265	-2.70281	0	0	thymidine phosphorylase
TYROBP	6.04567	1.52154	1.40118	5.03073	11.7051	1.52412	1.50778	1.53271	-1.99037	2.35016e-32	6.58153e-31	TYRO protein tyrosine kinase binding protein
UBE2L6	33.9579	11.1302	9.65668	15.5652	76.6519	9.65065	9.7568	13.9831	-1.60927	0	0	ubiquitin-conjugating enzyme E2L 6
UCP2	0.795064	0.322772	0.280799	0.726444	1.37795	0.559966	0.236373	0.171976	-1.30056	1.31019e-08	1.00616e-07	uncoupling protein 2 (mitochondrial, proton carrier)
UNC13D	0.429575	0.120428	0.118417	0.349591	0.820718	0.157431	0.120047	0.0838064	-1.83474	1.99654e-16	3.69619e-15	unc-13 homolog D (C. elegans)
USP18	4.50156	1.32808	0.54888	1.50071	11.4551	1.50289	0.666078	1.81528	-1.76108	3.99683e-79	1.91563e-77	ubiquitin specific peptidase 18
USP30-AS1	1.41739	0.374129	0.255987	0.594791	3.40139	0.171352	0.372156	0.57888	-1.92163	6.87328e-13	7.53234e-12	USP30 antisense RNA 1
USP32P2	0.905162	1.92656	1.48015	0.588812	0.646524	1.94782	1.93188	1.89999	1.08978	0	0	ubiquitin specific peptidase 32 pseudogene 2
USP9Y	0	0.624303	0	0	0	0	1.87009	0.00281945	Inf	0	0	ubiquitin specific peptidase 9, Y-linked
UTY	0	0.437368	0	0	0	0	1.31046	0.00164386	Inf	0	0	ubiquitously transcribed tetratricopeptide repeat containing, Y-linked
VAMP8	10.9106	4.08354	3.02769	10.4947	19.2094	4.21116	4.17276	3.86671	-1.41784	2.07705e-47	7.37519e-46	vesicle-associated membrane protein 8
VAV1	0.654176	0.192555	0.15737	0.638197	1.16696	0.14978	0.196571	0.231315	-1.76441	4.37244e-15	5.50003e-14	vav 1 guanine nucleotide exchange factor
VMO1	32.2366	6.0183	6.49123	34.4875	55.7311	1.7196	4.55819	11.7771	-2.42127	1.18918e-257	8.9565e-256	vitelline membrane outer layer 1 homolog (chicken)
VSIG4	3.25026	0.814527	0.632566	2.38102	6.73719	0.430042	1.01917	0.994369	-1.99652	1.54223e-60	6.29666e-59	V-set and immunoglobulin domain containing 4
WARS	122.828	36.3292	32.9685	24.8856	310.63	30.5324	38.1213	40.334	-1.75744	0	0	tryptophanyl-tRNA synthetase
WDFY4	0.211041	0.0684381	0.0423129	0.248518	0.342292	0.0962348	0.0313358	0.0777438	-1.62465	4.90596e-16	6.8814e-15	WDFY family member 4
WISP2	24.0304	8.63491	21.1373	22.9257	28.0283	4.47603	9.26101	12.1677	-1.47661	1.18325e-147	7.2101e-146	WNT1 inducible signaling pathway protein 2
WNT10A	0.236004	0.00397293	0.0810868	0.244929	0.381997	0	0	0.0119188	-5.89246	2.33509e-11	2.29739e-10	wingless-type MMTV integration site family, member 10A
WNT4	0.262178	0.544849	0.172608	0.384824	0.229102	0.563257	0.977053	0.0942366	1.05531	1.09987e-07	7.64522e-07	wingless-type MMTV integration site family, member 4
WNT7B	0.0802891	0.383725	0.147685	0.0867403	0.00644203	1.04953	0.0256659	0.075978	2.2568	2.43954e-09	2.0076e-08	wingless-type MMTV integration site family, member 7B
XIRP1	0.0794678	0.0288046	0.101359	0.0200105	0.117034	0.0616112	0.0116569	0.0131458	-1.46407	0.000178518	0.000809841	xin actin-binding repeat containing 1
ZBED2	0.25925	0.0168045	0	0.0513433	0.726408	0.0190175	0.00569707	0.0256988	-3.94743	4.79722e-12	4.94305e-11	zinc finger, BED-type containing 2
ZBP1	0.417587	0.088205	0.0747598	0.595907	0.582093	0.0650553	0.0292328	0.170327	-2.24314	2.51906e-11	2.46538e-10	Z-DNA binding protein 1
ZBTB7C	0.2398	0.0619561	0.0369372	0.437763	0.244701	0.080356	0.0240722	0.0814401	-1.95252	4.39404e-09	3.53799e-08	zinc finger and BTB domain containing 7C
ZC3H12A	5.81268	2.48433	2.73698	3.76595	10.9351	2.85371	2.58776	2.01152	-1.22635	1.98869e-73	9.16916e-72	zinc finger CCCH-type containing 12A
ZFY	0.00647515	0.869287	0.00342915	0.0115089	0.0044874	0.0149201	2.5879	0.00504046	7.06877	0	0	zinc finger protein, Y-linked
ZMYND15	0.951702	0.371985	0.291075	1.14852	1.41551	0.213928	0.497309	0.404719	-1.35526	1.0731e-11	1.07808e-10	zinc finger, MYND-type containing 15
ZNF366	0.213326	0.0672664	0.0486667	0.268336	0.322976	0.0378119	0.0362473	0.12774	-1.6651	7.79213e-05	0.000375173	zinc finger protein 366
ZNF702P	0.736683	0.310529	0.411251	0.722468	1.07633	0.34948	0.360145	0.221962	-1.24632	1.17467e-10	1.09192e-09	zinc finger protein 702, pseudogene
ZSCAN23	0.215934	0.628317	0.255881	0.16869	0.223231	0.497022	0.667038	0.72089	1.5409	1.24547e-11	1.2425e-10	zinc finger and SCAN domain containing 23
